# Supplementary material for: Identification, synthesis and characterization of process related desfluoro impurity of ezetimibe and HPLC method validations
Source: PubMed Central journal article supplement — J Pharm Anal. 2015 Apr 24;5(6):356–70. doi: 10.1016/j.jpha.2015.04.002 (PMC5762248; doi:10.1016/j.jpha.2015.04.002), 2015-04-24
Supplement: mmc1.pdf [file mmc1.pdf]

## Supporting Information for

# Identification, synthesis and characterization of process related desfluoro impurity of ezetimibe and HPLC method validations

Esen Bellur Atici<sup>a,\*</sup>, Bekir Karlığa<sup>a</sup>

<sup>a</sup>*Deva Holding A.Ş., Çerkezköy-2 Production Plant, Karaağaç Mh. Fatih Blv. No: 26 Address No: 2278035833 Kapaklı, Tekirdağ, Turkey*

\*Corresponding author. Tel: +90 282 7581771 (4413), Fax: +90 282 7581770

E-mail addresses: [ebellur@deva.com.tr](mailto:ebellur@deva.com.tr), [esenbellur@yahoo.com](mailto:esenbellur@yahoo.com)

### Table of contents

<sup>1</sup>H, <sup>13</sup>C and DEPT (or APT) NMR; MS and IR spectral data of:

|                                                                    |    |
|--------------------------------------------------------------------|----|
| Eze-1                                                              | 2  |
| Desfluoro Eze-1                                                    | 6  |
| Eze-4                                                              | 11 |
| Eze-5                                                              | 15 |
| Desfluoro Eze-5                                                    | 19 |
| Eze-6                                                              | 24 |
| Desfluoro Eze-6                                                    | 29 |
| Eze-7                                                              | 34 |
| Desfluoro Eze-7                                                    | 39 |
| Ezetimibe                                                          | 44 |
| Desfluoro Ezetimibe                                                | 51 |
| Ezetimibe vs Desfluoro Ezetimibe                                   | 57 |
| HPLC chromatograms of Eze-5-6-7+desfluoro Eze-5-6-7+spiked samples | 58 |

STANDARD 1H OBSERVE

exp1 s2pu1

SAMPLE SPECIAL  
date Jun 11 2007 temp not used  
solvent DMSO gain not used  
file exp spin 20  
ACQUISITION hst 0.008  
sw 4798.5 pw90 15.400  
at 1.998 alfa 20.000  
np 19174  
fb 2600 il n  
bs 16 in n  
d1 1.000 dp y  
nt 8 hs nn  
ct  
TRANSMITTER fn  
tn H1  
sfrq 299.927 sp 226.8  
tof 255.9 wp 2912.1  
tpwr 56 rfl 599.7  
pw 7.700 rfp 0  
DECOUPLER rp -167.9  
dn C13 lp -80.7  
dof 0  
dm nnn wc 250  
dmm c sc 0  
dpwr 1 vs 109  
dmf 200 th 6  
ai cdc ph

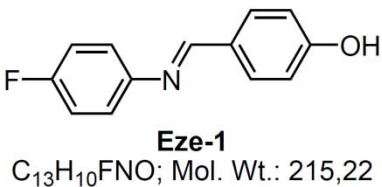

| INDEX | FREQUENCY | PPM    | HEI |
|-------|-----------|--------|-----|
| 1     | 3045.437  | 10.154 |     |
| 2     | 2527.927  | 8.429  |     |
| 3     | 2327.015  | 7.759  |     |
| 4     | 2318.522  | 7.730  |     |
| 5     | 2176.477  | 7.257  |     |
| 6     | 2167.398  | 7.226  |     |
| 7     | 2161.833  | 7.208  |     |
| 8     | 2153.047  | 7.179  |     |
| 9     | 2146.311  | 7.156  |     |
| 10    | 2143.968  | 7.148  |     |
| 11    | 2063.135  | 6.879  |     |
| 12    | 2054.641  | 6.851  |     |
| 13    | 1022.550  | 3.409  |     |
| 14    | 743.733   | 2.480  |     |
| 15    | 307.056   | 1.024  |     |
| 16    | 300.905   | 1.003  |     |

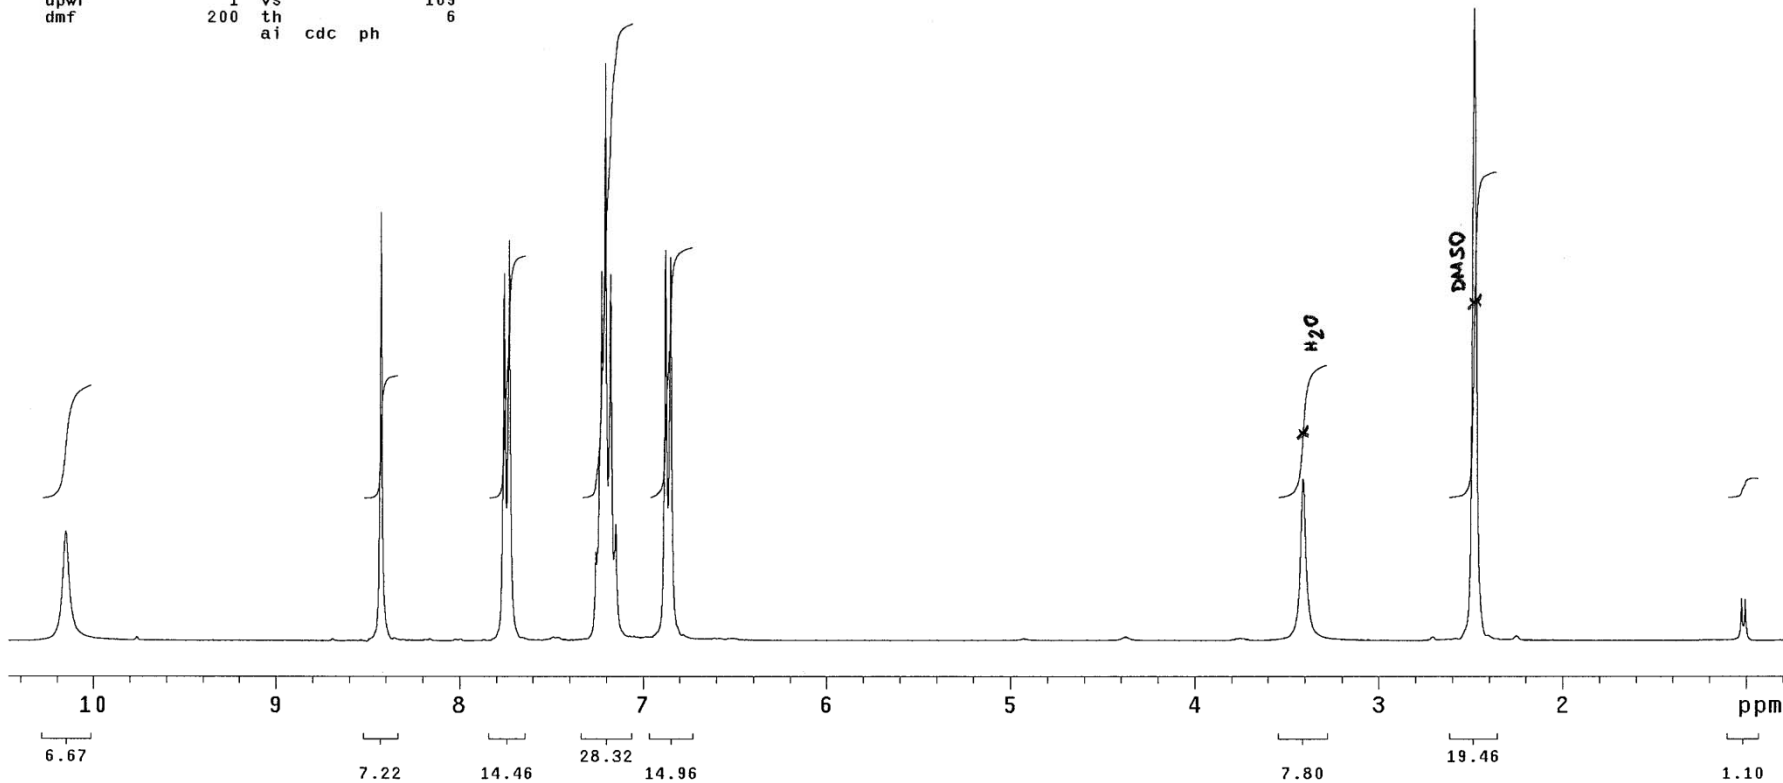

13C OBSERVE

exp1 s2pu1

SAMPLE SPECIAL  
date Jun 11 2007 temp not used  
solvent DMSO gain not used  
file exp spin 20  
ACQUISITION hst 0.008  
sw 18867.9 pw90 18.875  
at 1.815 a1fa 20.000  
np 68492  
fb 10400 il n  
bs 64 in n  
d1 1.000 dp y  
nt 256 hs nn  
ct 128  
TRANSMITTER lb 1.00  
tn C13 fn not used  
sfrq 75.425  
tof 725.6 sp 2810.1  
tpwr 56 wp 9633.5  
pw 9.438 rfl 1138.2  
DECOUPLER rfp 0  
dn H1 rp 49.0  
dof 0 lp -243.7  
dm yyw  
dmm w wc 250  
dpwr 41 sc 0  
dmf 11400 vs 127  
ai no ph th 8

FLAGS

PROCESSING

DISPLAY

PLOT

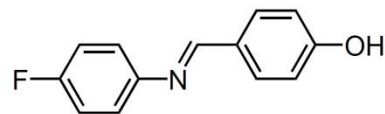

Eze-1

C<sub>13</sub>H<sub>10</sub>FNO; Mol. Wt.: 215,22

| INDEX | FREQUENCY | PPM     | HEI |
|-------|-----------|---------|-----|
| 1     | 12250.125 | 162.433 |     |
| 2     | 12167.497 | 161.338 |     |
| 3     | 12127.479 | 160.807 |     |
| 4     | 12008.576 | 159.231 |     |
| 5     | 11235.560 | 148.981 |     |
| 6     | 11232.969 | 148.946 |     |
| 7     | 9907.757  | 131.374 |     |
| 8     | 9658.146  | 128.064 |     |
| 9     | 9298.557  | 123.296 |     |
| 10    | 9290.208  | 123.186 |     |
| 11    | 8792.426  | 116.585 |     |
| 12    | 8772.561  | 116.322 |     |
| 13    | 8770.258  | 116.291 |     |
| 14    | 3087.942  | 40.945  |     |
| 15    | 3067.213  | 40.670  |     |
| 16    | 3046.196  | 40.392  |     |
| 17    | 3025.467  | 40.117  |     |
| 18    | 3004.739  | 39.842  |     |
| 19    | 2983.722  | 39.563  |     |
| 20    | 2962.417  | 39.281  |     |

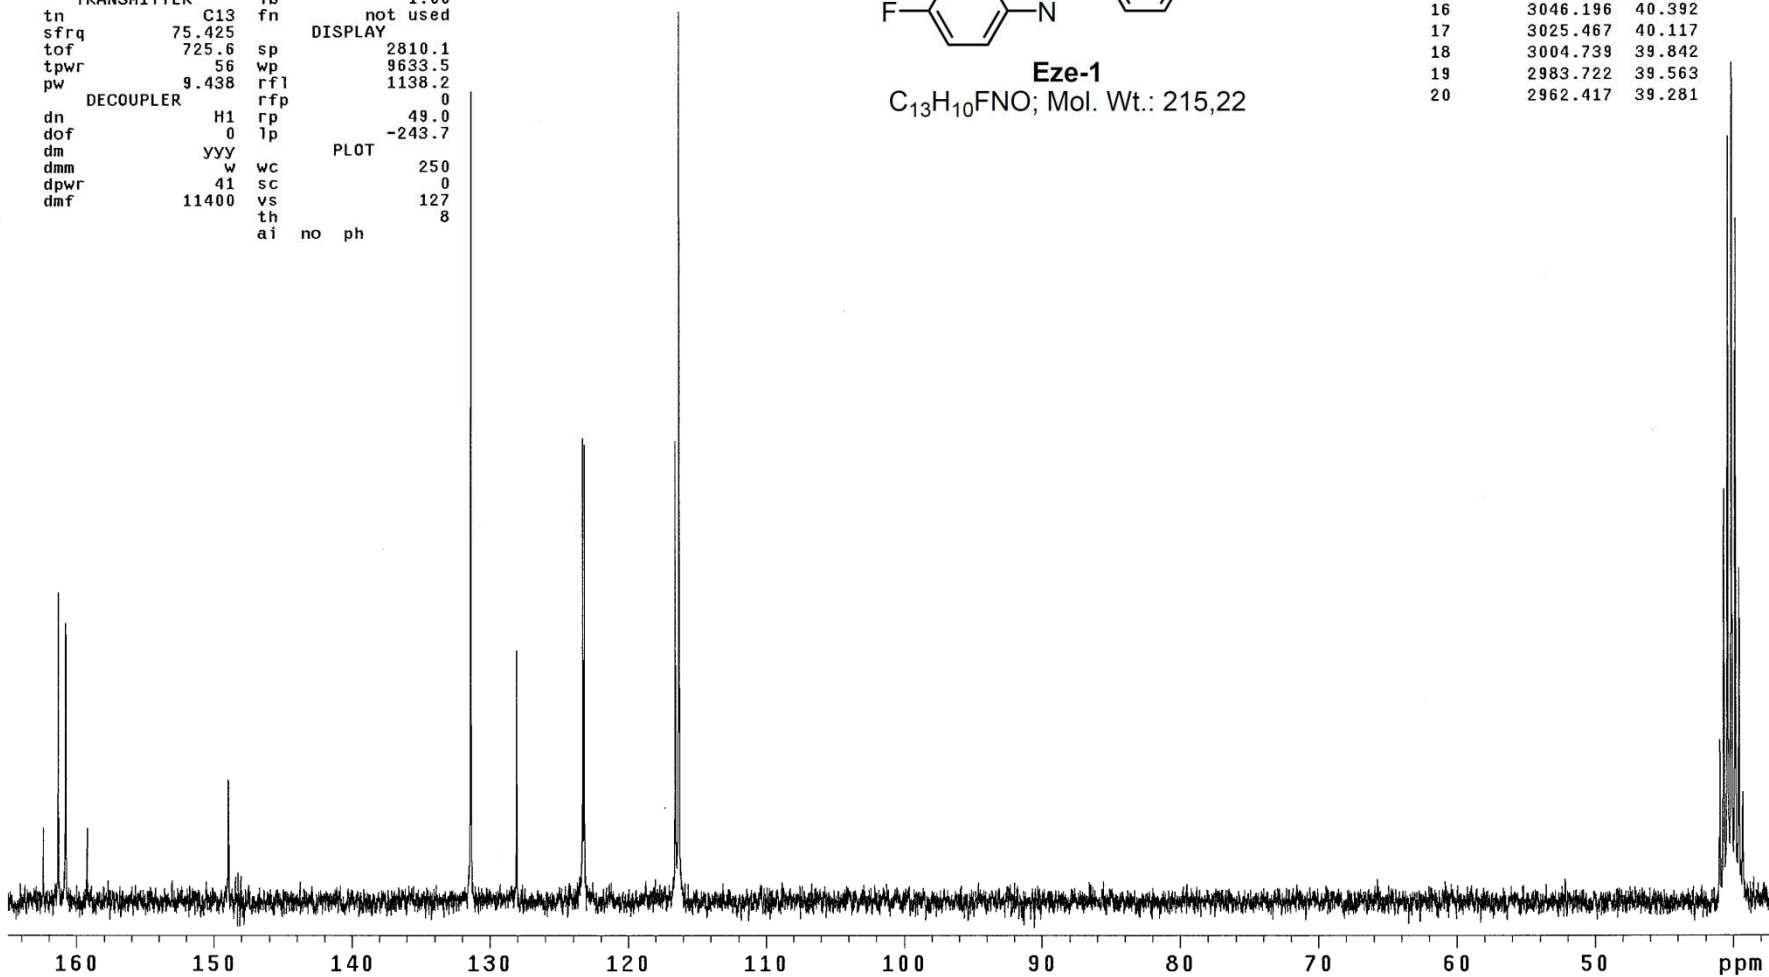

EZE

EZE + 1 (1.019)

Scan ES+  
3.89e9

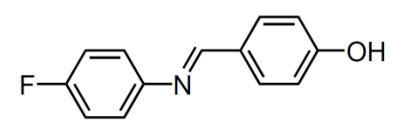

**Eze-1**  
C<sub>13</sub>H<sub>10</sub>FNO; Mol. Wt.: 215,22

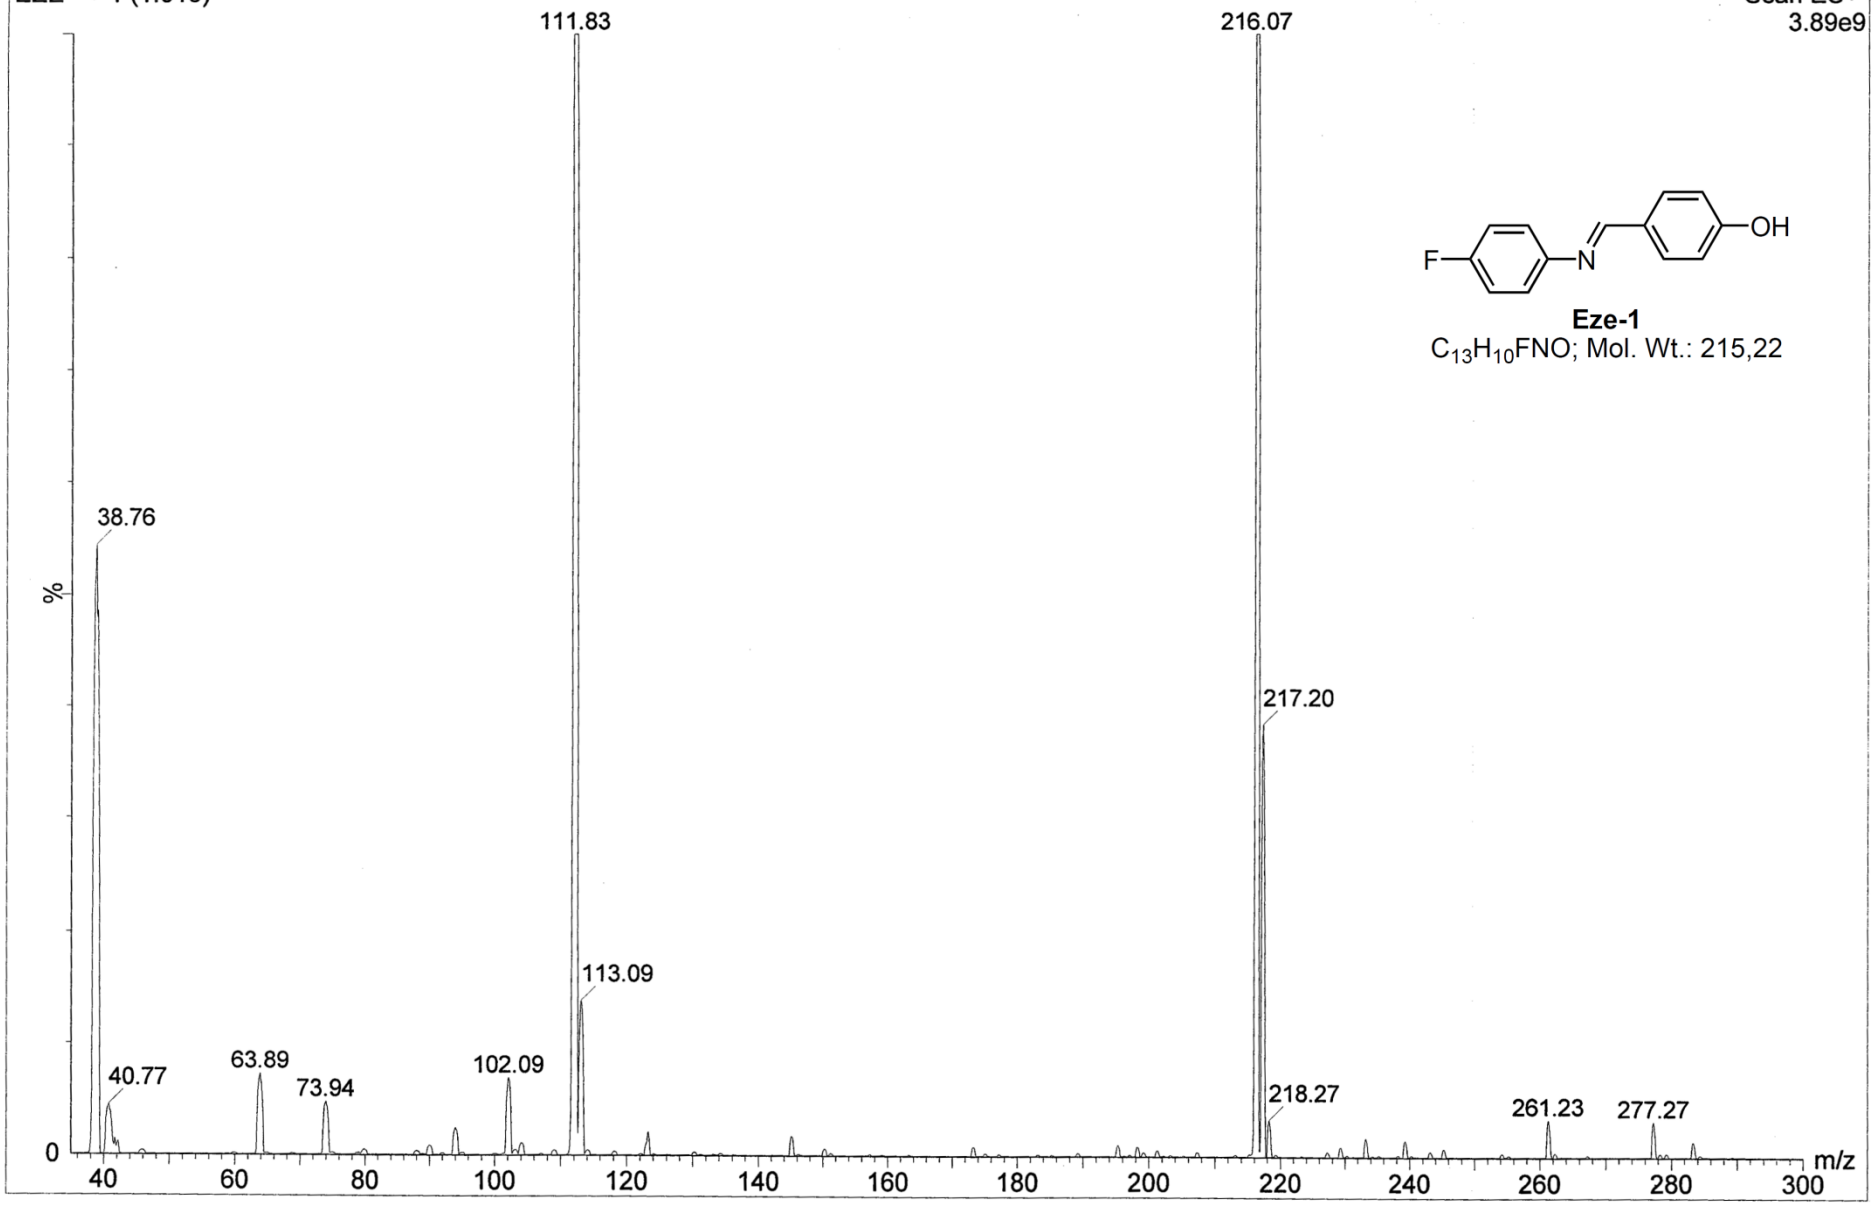



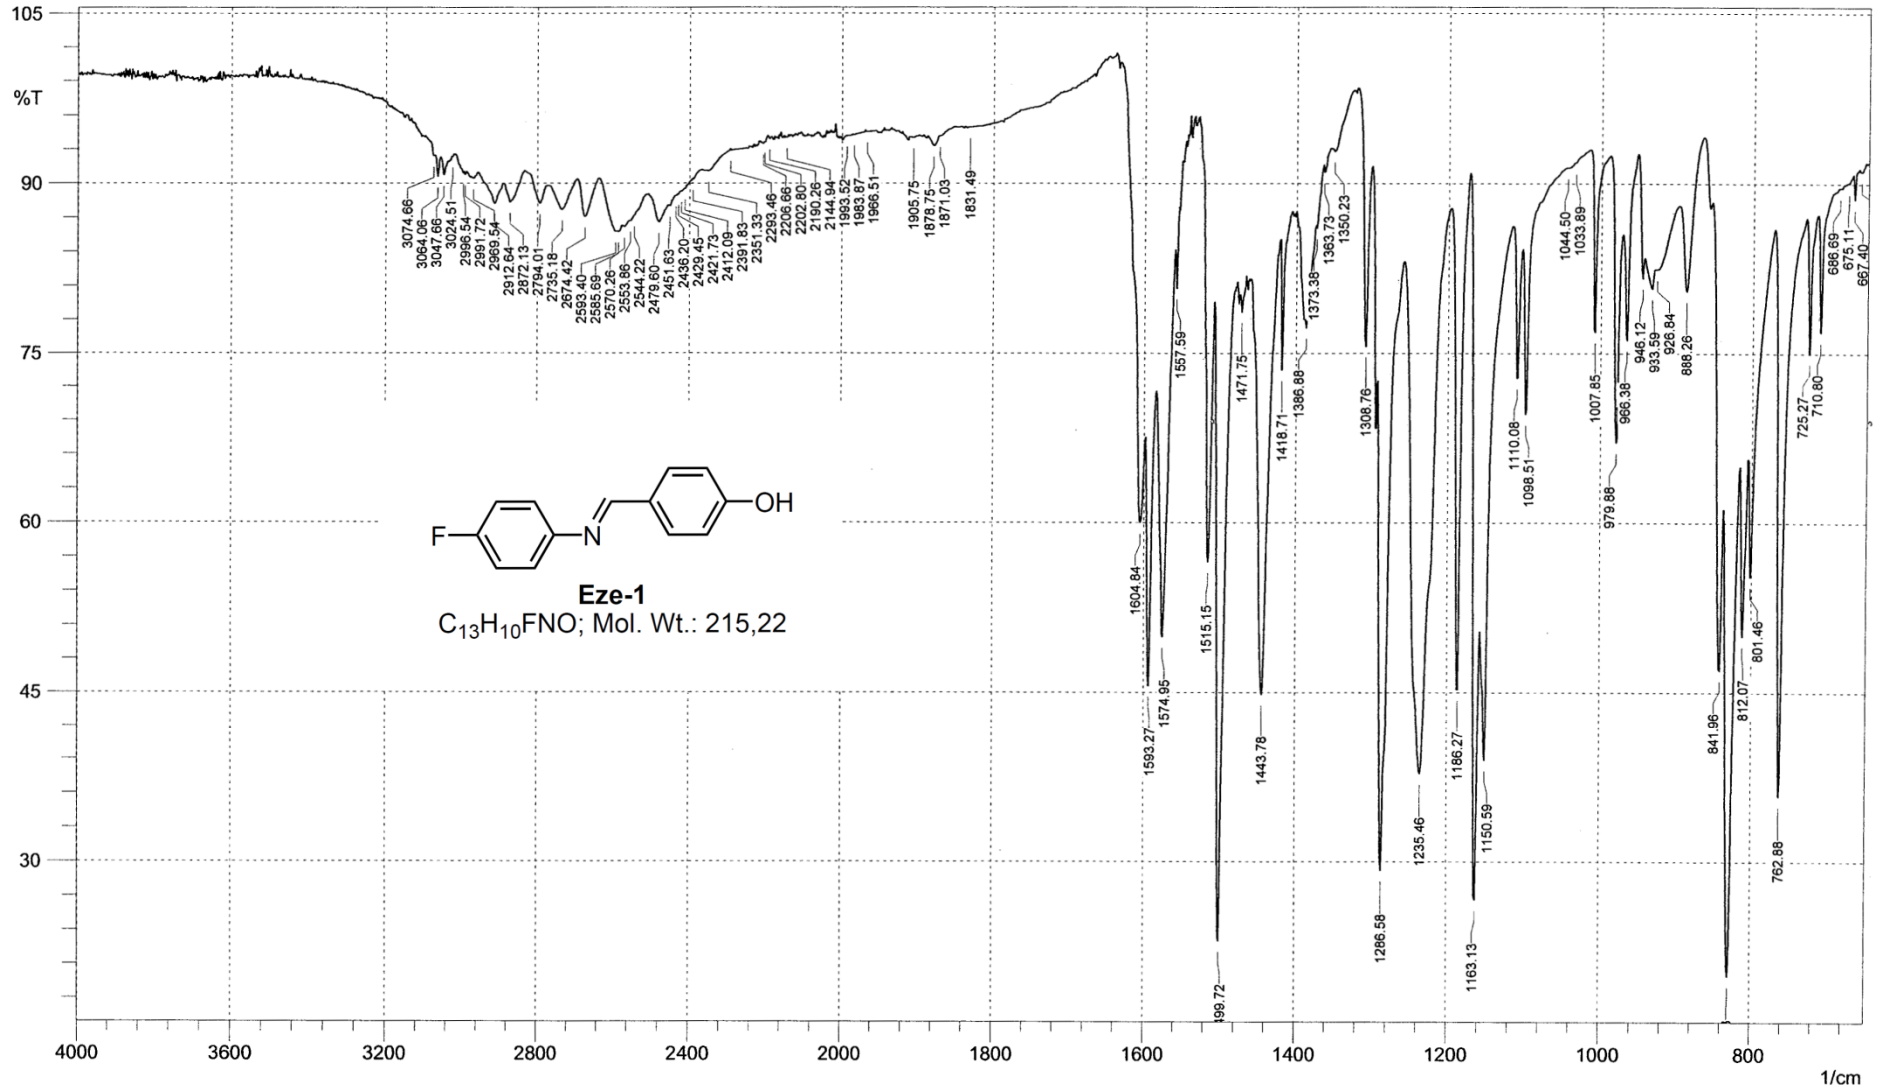

STANDARD 1H OBSERVE

exp5 s2pu1

|                      |                |            |          |
|----------------------|----------------|------------|----------|
| SAMPLE               |                | SPECIAL    |          |
| date                 | Jan 19 2010    | temp       | not used |
| solvent              | DMSO           | gain       | not used |
| file                 | /export/home/~ | spin       | 20       |
| vnmr1/vnmrsys/data/~ |                | hst        | 0.008    |
| /EB.01.137-1-DMSO~   |                | pw90       | 14.500   |
|                      | H.fid          | alfa       | 20.000   |
| ACQUISITION          |                | FLAGS      |          |
| sw                   | 4798.5         | il         | n        |
| at                   | 1.998          | in         | n        |
| np                   | 19174          | dp         | y        |
| fb                   | 2600           | hs         | nn       |
| bs                   | 16             | PROCESSING |          |
| d1                   | 1.000          | fn         | not used |
| nt                   | 1200           | DISPLAY    |          |
| ct                   | 1200           | sp         | -599.4   |
| TRANSMITTER          |                | wp         | 4798.2   |
| tn                   | H1             | rfl        | 599.7    |
| sfrq                 | 299.927        | rfp        | 0        |
| tof                  | 255.9          | rp         | 70.5     |
| tpwr                 | 56             | lp         | -78.8    |
| pw                   | 7.250          | PLOT       |          |
| DECOUPLER            |                | wc         | 250      |
| dn                   | C13            | sc         | 0        |
| dof                  | 0              | vs         | 170      |
| dm                   | nnn            | th         | 174      |
| dmm                  | c              | ai         | cdc ph   |
| dpwr                 | 42             |            |          |
| dmf                  | 13100          |            |          |

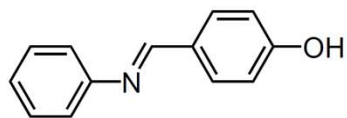

**desfluoro Eze-1**  
 $C_{13}H_{11}NO$ ; Mol. Wt.: 197,23

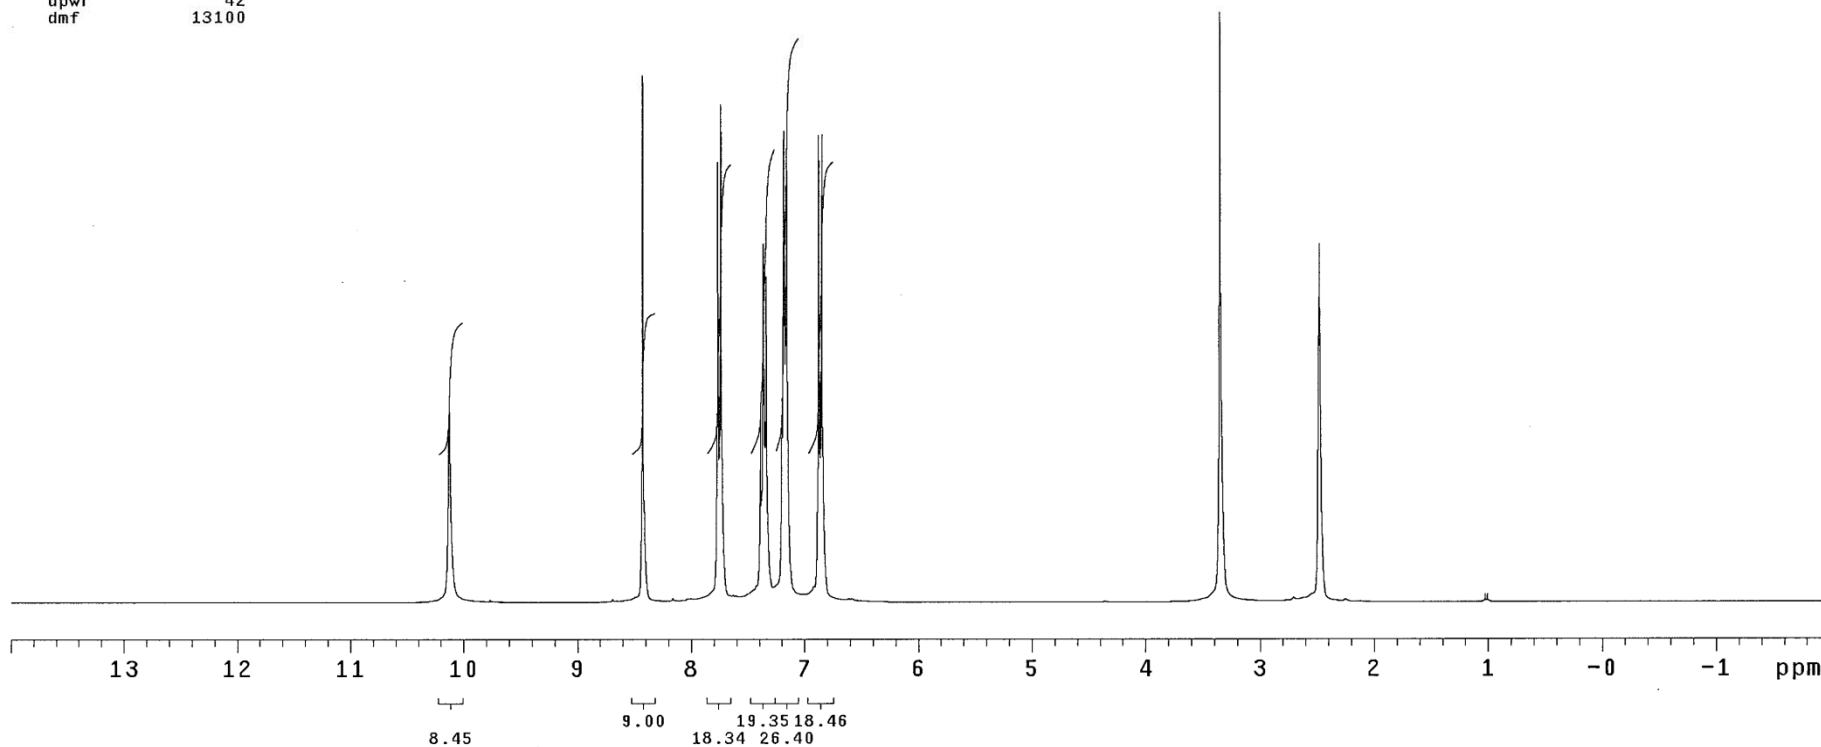

13C OBSERVE

exp5 s2pu1

| SAMPLE                |                | SPECIAL |          |
|-----------------------|----------------|---------|----------|
| date                  | Jan 19 2010    | temp    | not used |
| solvent               | DMSO           | gain    | not used |
| file                  | /export/home/~ | spin    | 20       |
| vnmr1/vnmr/sys/data/~ |                | hst     | 0.008    |
| /EB.01.137-1-DMSO-~   |                | pw90    | 16.750   |
| C.fid                 | alfa           |         | 20.000   |

  

| ACQUISITION |         | FLAGS |    |
|-------------|---------|-------|----|
| sw          | 18867.9 | il    | n  |
| at          | 1.815   | in    | n  |
| np          | 68492   | dp    | y  |
| fb          | 10400   | hs    | nn |
| bs          | 64      |       |    |

  

| PROCESSING |          |          |
|------------|----------|----------|
| d1         | 1.000 lb | 1.00     |
| nt         | 20000 fn | not used |
| ct         | 1472     |          |

  

| TRANSMITTER |        | DISPLAY |         |
|-------------|--------|---------|---------|
| tn          | C13    | sp      | -1137.9 |
| sfrq        | 75.425 | wp      | 18867.6 |
| tof         | 725.6  | rfl     | 1138.2  |
| tpwr        | 56     | rfp     | 0       |
| pw          | 8.375  | rp      | -1.0    |
|             |        | lp      | -255.5  |

  

| DECOUPLER |      | PLOT |       |
|-----------|------|------|-------|
| dn        | H1   | wc   | 250   |
| dof       | 0    | sc   | 0     |
| dm        | yyy  | vs   | 181   |
| dmm       | w    | th   | 178   |
| dpwr      | 36   | ai   | no ph |
| dmf       | 6500 |      |       |

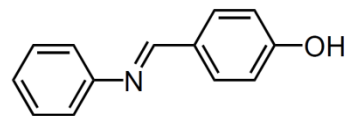

**desfluoro Eze-1**  
C<sub>13</sub>H<sub>11</sub>NO; Mol. Wt.: 197,23

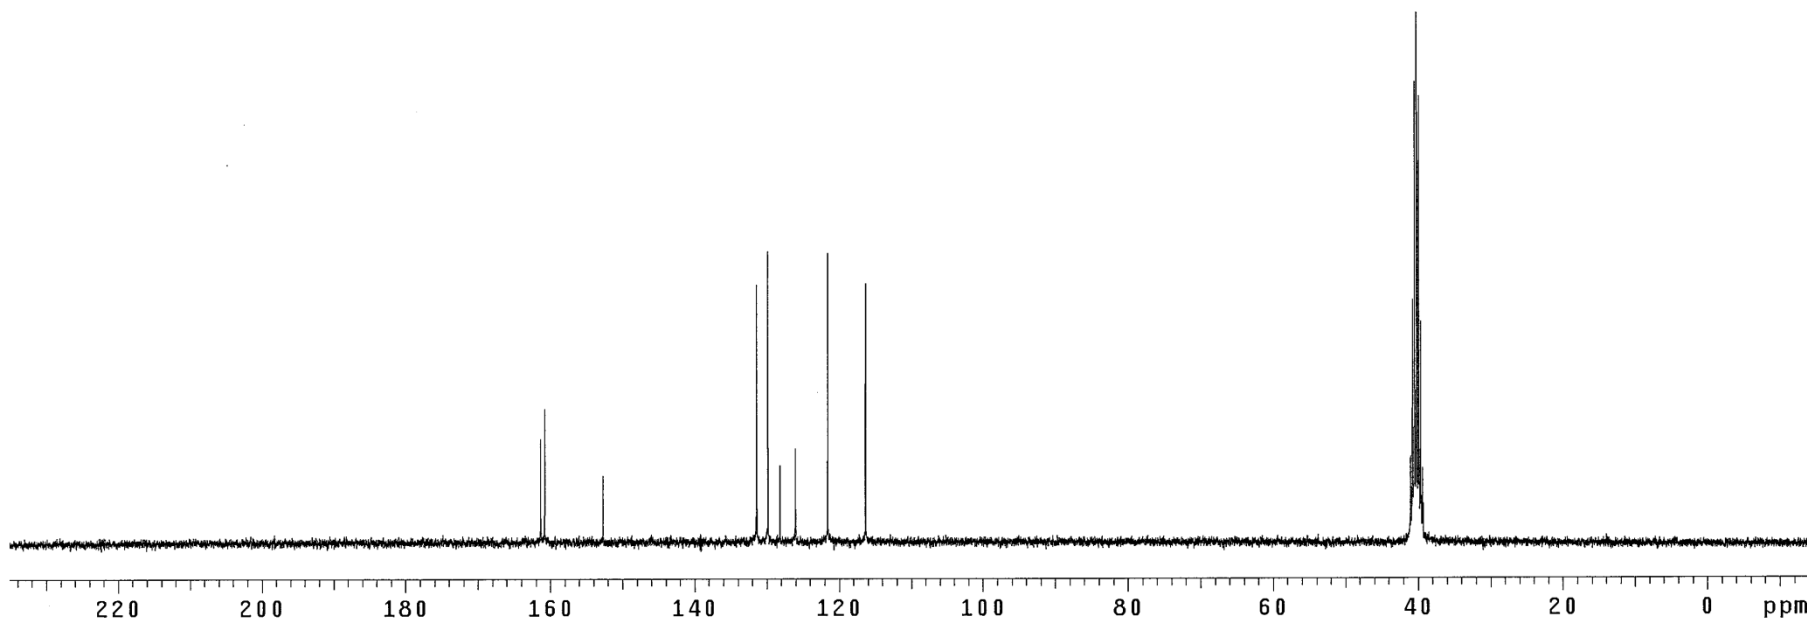

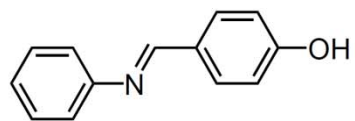

**desfluoro Eze-1**  
 $C_{13}H_{11}NO$ ; Mol. Wt.: 197,23

CH3 carbons

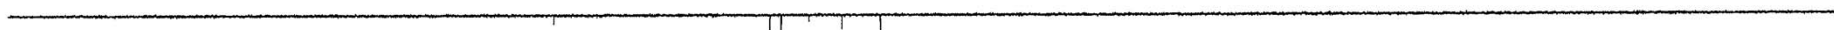

CH2 carbons

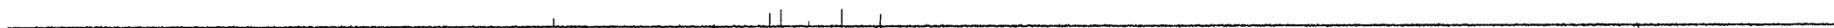

CH carbons

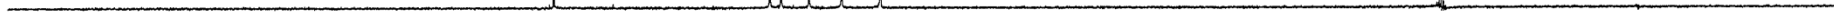

all protonated carbons

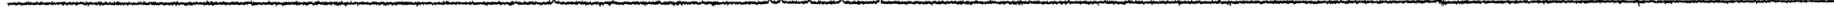

220 200 180 160 140 120 100 80 60 40 20 0 ppm

EB.01.137

EB01137+ 1 (1.019)

Scan ES+  
3.89e9

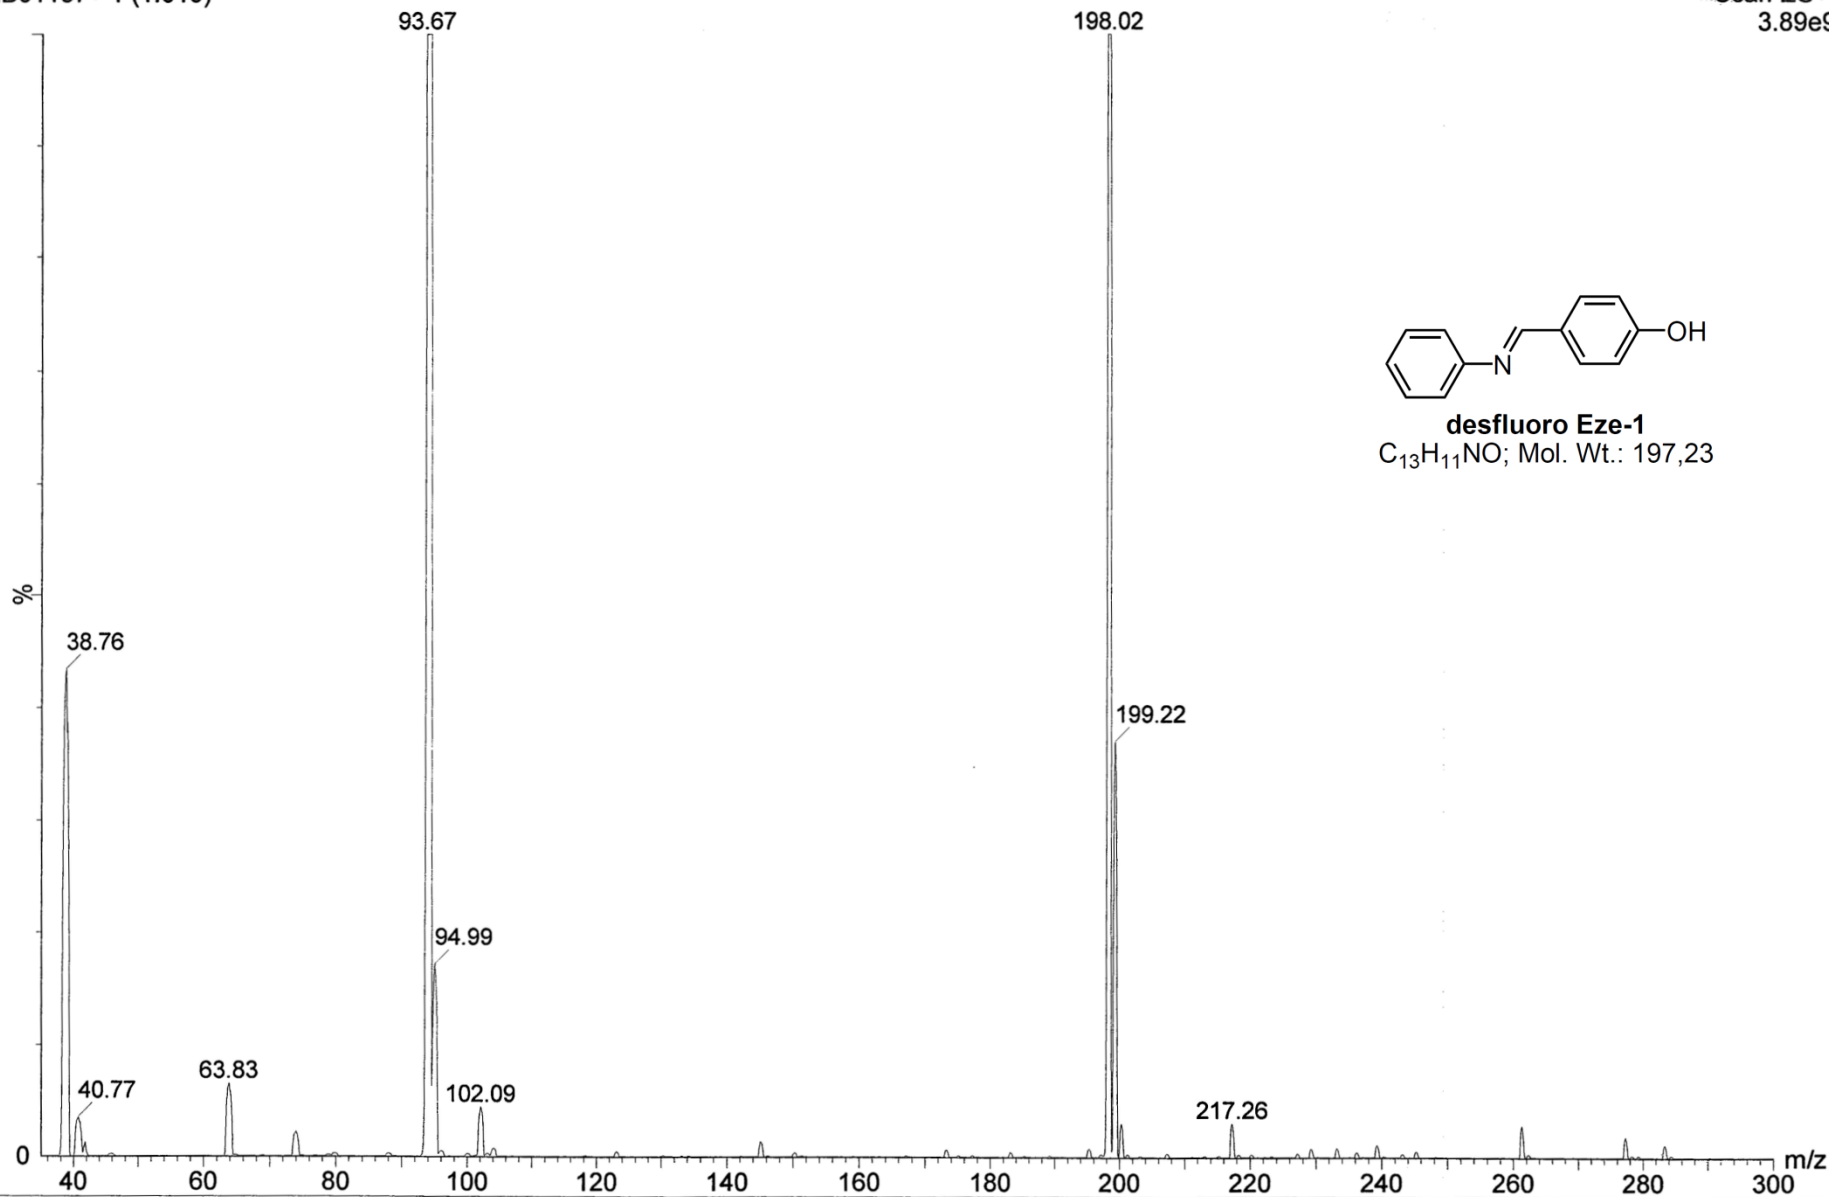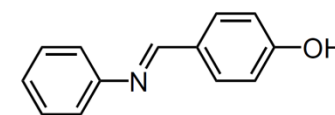

**desfluoro Eze-1**  
C<sub>13</sub>H<sub>11</sub>NO; Mol. Wt.: 197,23

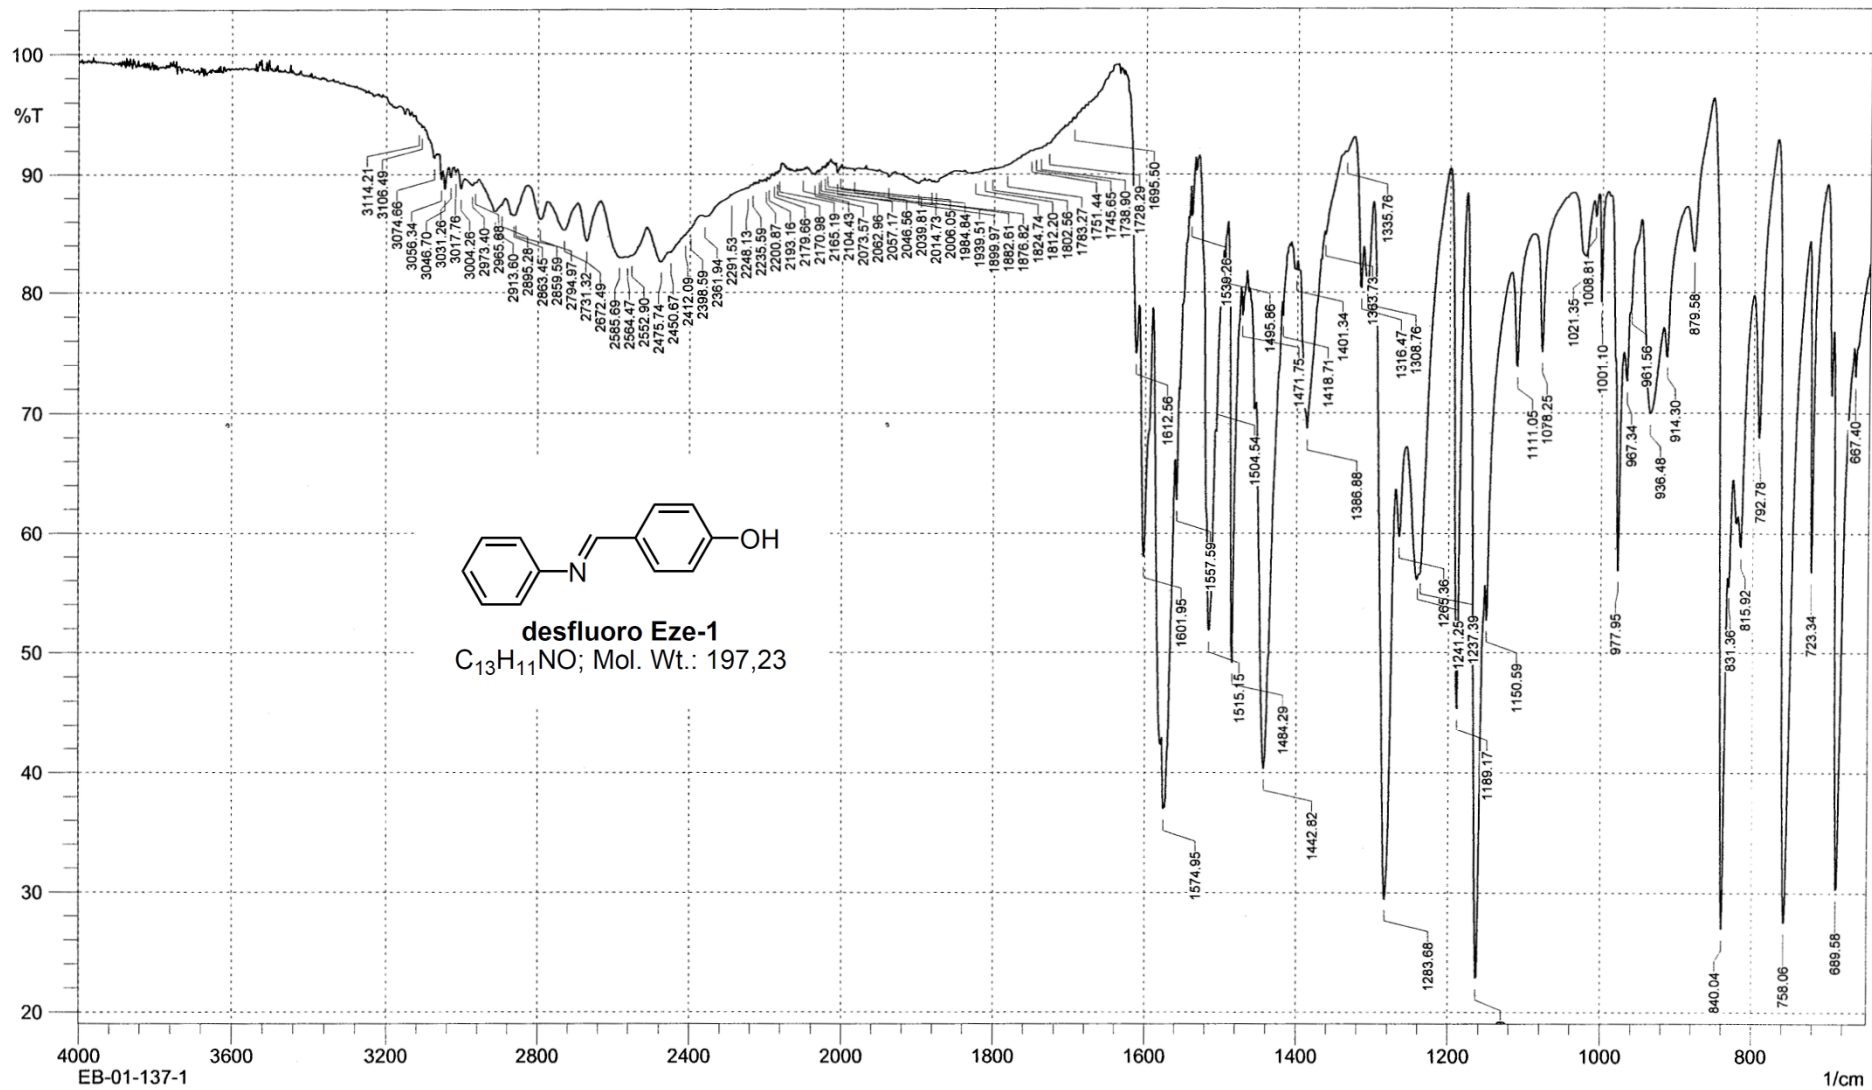

STANDARD 1H OBSERVE

exp1 s2pu1

|                     |                |            |          |
|---------------------|----------------|------------|----------|
| SAMPLE              |                | SPECIAL    |          |
| date                | Mar 4 2009     | temp       | not used |
| solvent             | CDC13          | gain       | not used |
| file                | /export/home/~ | spin       | 20       |
| vnmr1/vnmrSYS/data~ |                | hst        | 0.008    |
| /EB.01.117-EZE21-C~ |                | pw90       | 14.500   |
|                     | DCL3-H.fid     | alfa       | 20.000   |
| ACQUISITION         |                | FLAGS      |          |
| sw                  | 4798.5         | il         | n        |
| at                  | 1.998          | in         | n        |
| np                  | 19174          | dp         | y        |
| fb                  | 2600           | hs         | nn       |
| bs                  | 16             |            |          |
| d1                  | 1.000          | fn         | not used |
| nt                  | 600            |            |          |
| ct                  | 600            |            |          |
| TRANSMITTER         |                | PROCESSING |          |
| tn                  | H1             | sp         | -599.4   |
| sfrq                | 299.926        | wp         | 4798.2   |
| tof                 | 255.9          | rfl        | 599.7    |
| tpwr                | 56             | rfl        | 0        |
| pw                  | 7.250          | rp         | 133.9    |
|                     |                | lp         | -51.8    |
| DECOUPLER           |                | PLOT       |          |
| dn                  | C13            | wc         | 250      |
| dof                 | 0              | sc         | 0        |
| dm                  | nnn            | vs         | 171      |
| dmm                 | c              | th         | 54       |
| dpwr                | 41             | ai         | cdc ph   |
| dmf                 | 13100          |            |          |

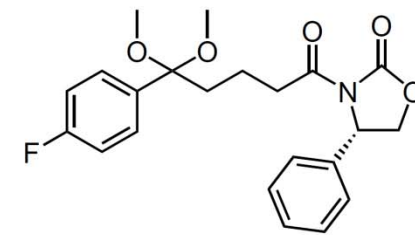

**Eze-4**  
 $C_{22}H_{24}FNO_5$ ; Mol. Wt.: 401,43

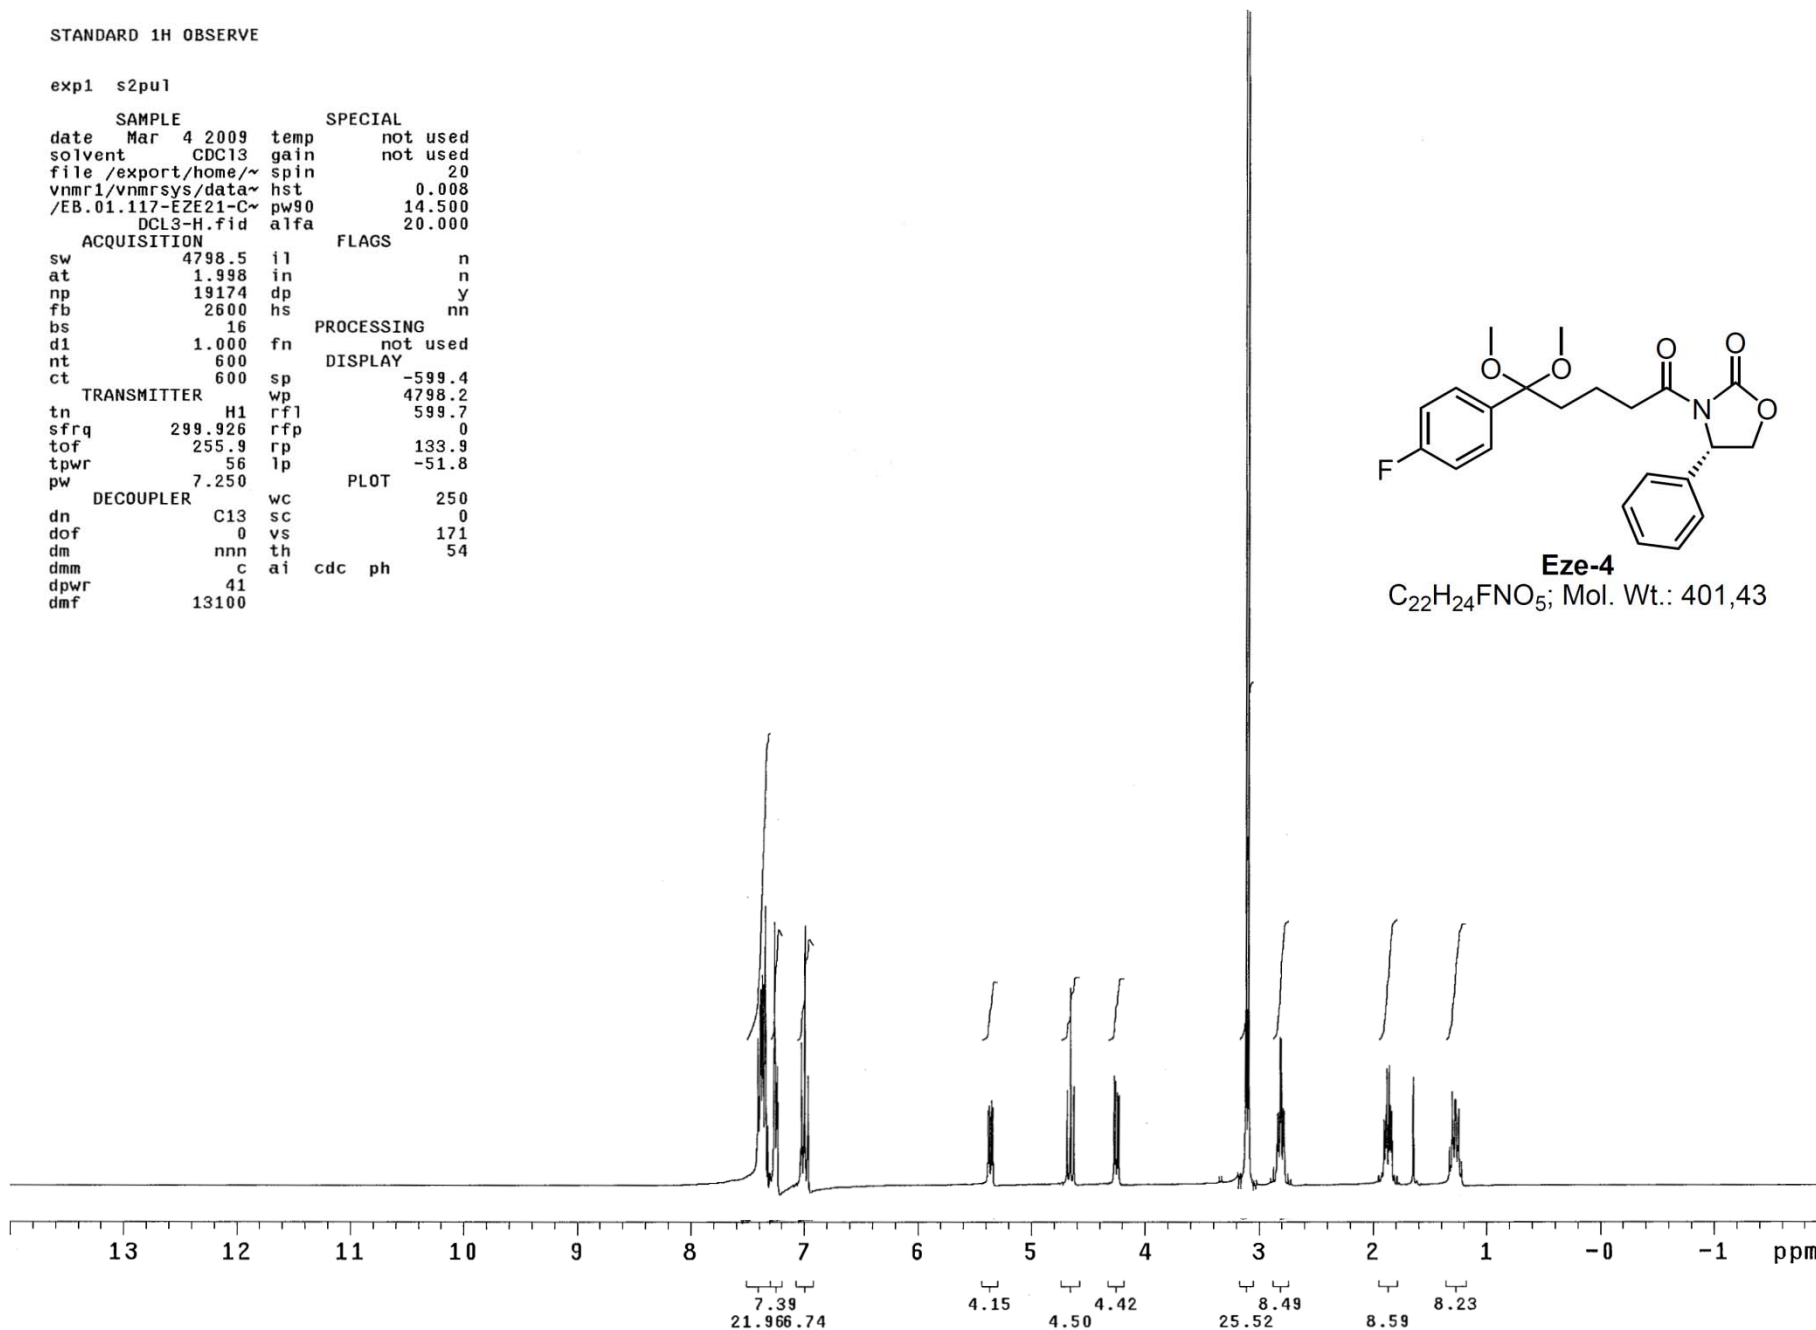

13C OBSERVE

exp1 s2pu1

```

SAMPLE
date Mar 4 2009 temp not used
solvent CDC13 gain not used
file /export/home/~ spin 20
vnmr1/vnmrSYS/data~ hst 0.008
/EB.01.117-EZE21-C~ pw90 14.200
DCL3-C.fid alfa 20.000

ACQUISITION
sw 18867.9 il n
at 1.815 in n
np 68492 dp y
fb 10400 hs nn
bs 64
d1 1.000 lb 1.00
nt 5000 fn not used
ct 512

TRANSMITTER
tn C13 wp 18761.7
sfrq 75.424 rfl 1138.2
tof 725.6 rfp 0
tpwr 56 rp -48.4
pw 7.100 lp -228.1

DECOUPLER
dn H1 wc 250
dof 0 sc 0
dm yy vs 102
dmm w th 9
dpwr 36 ai no ph
dmf 6500

```

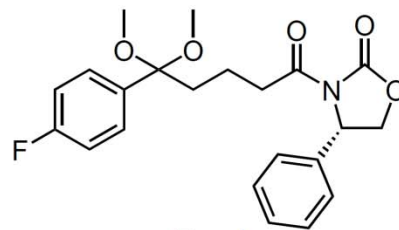

**Eze-4**

C<sub>22</sub>H<sub>24</sub>FNO<sub>5</sub>; Mol. Wt.: 401,43

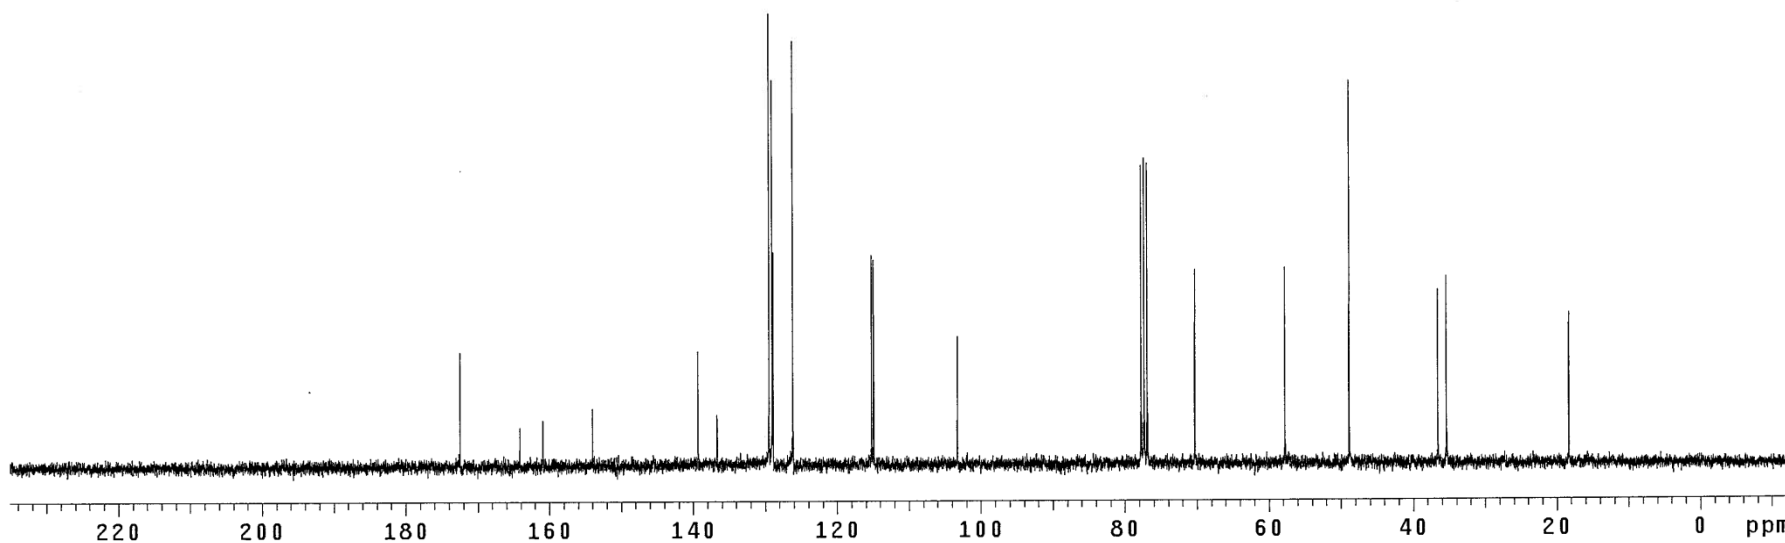



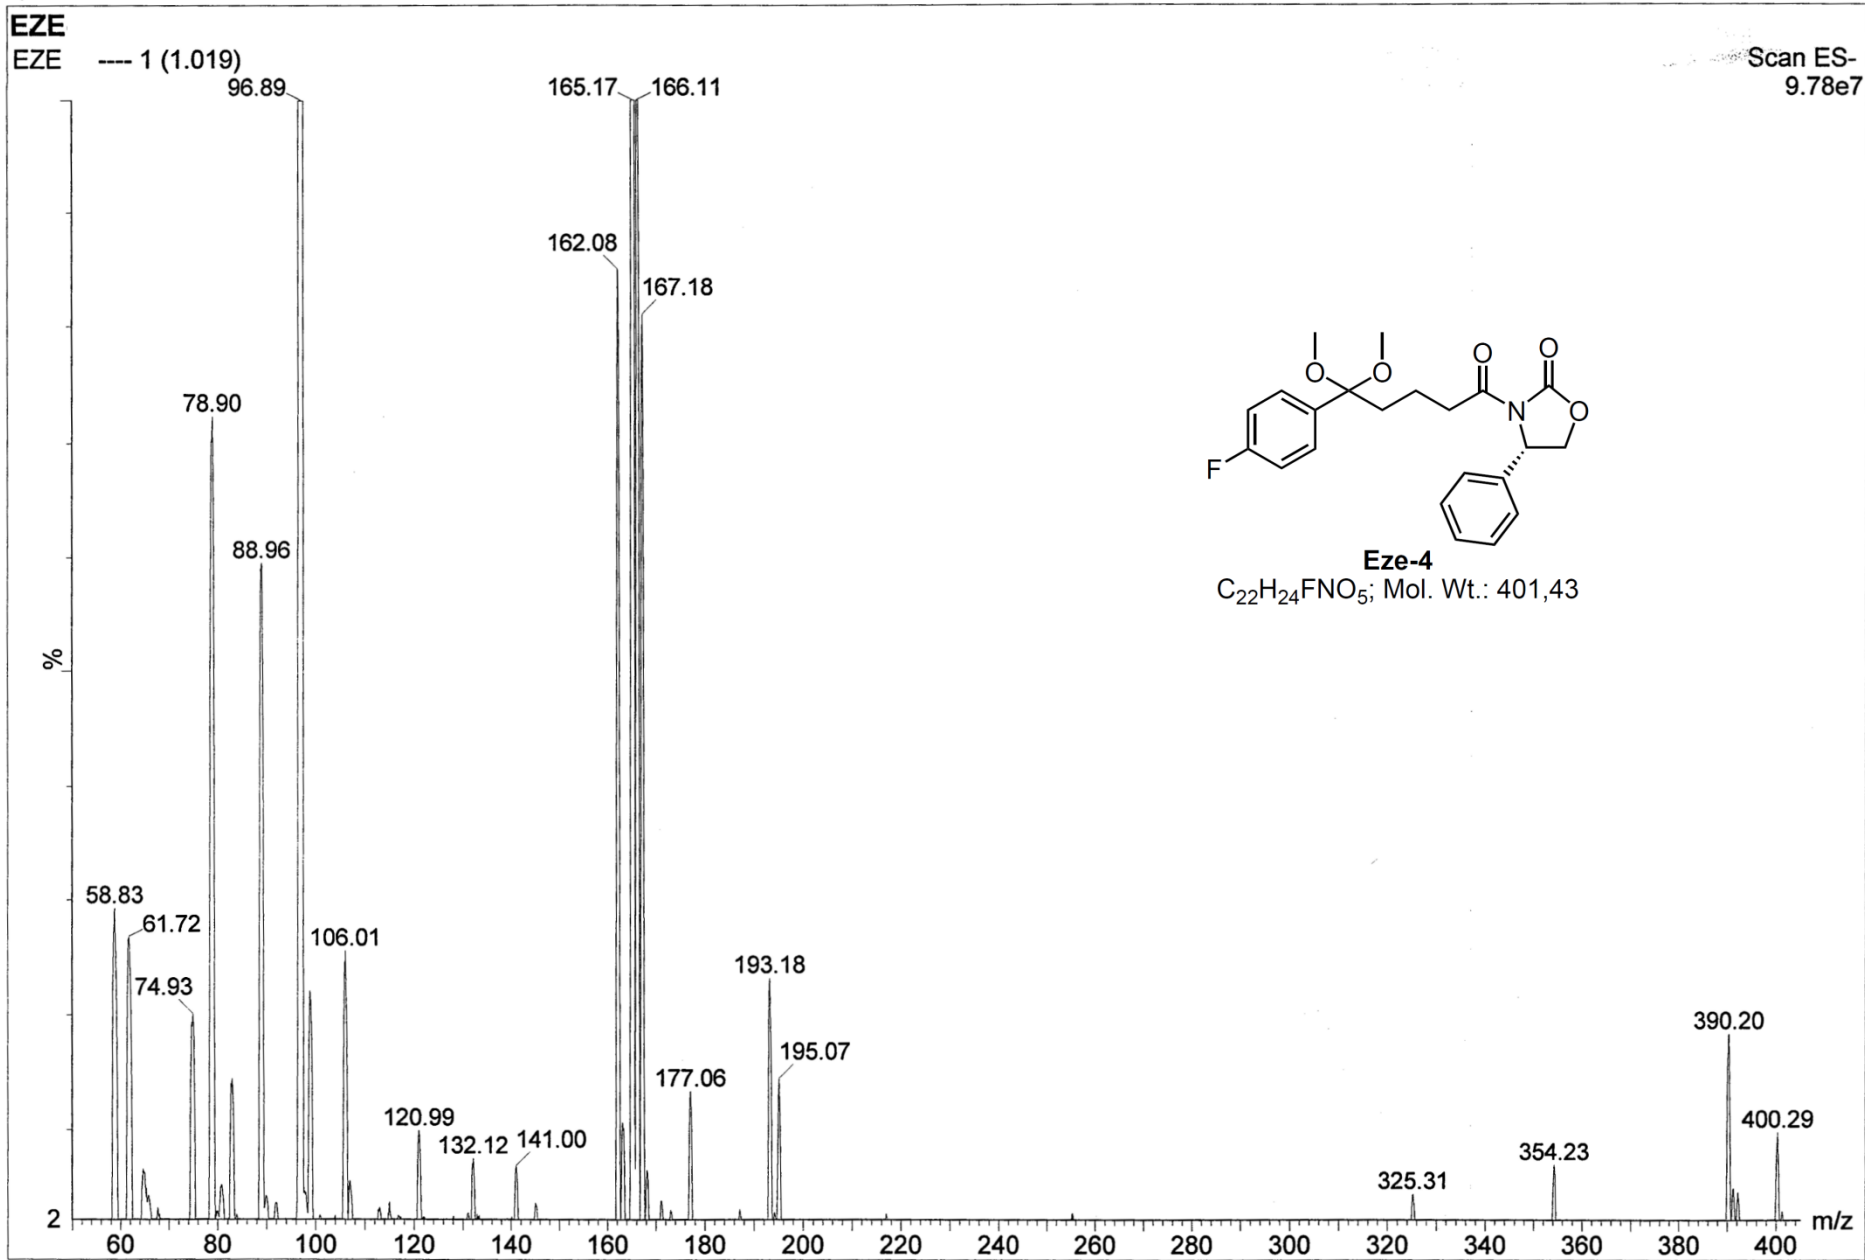

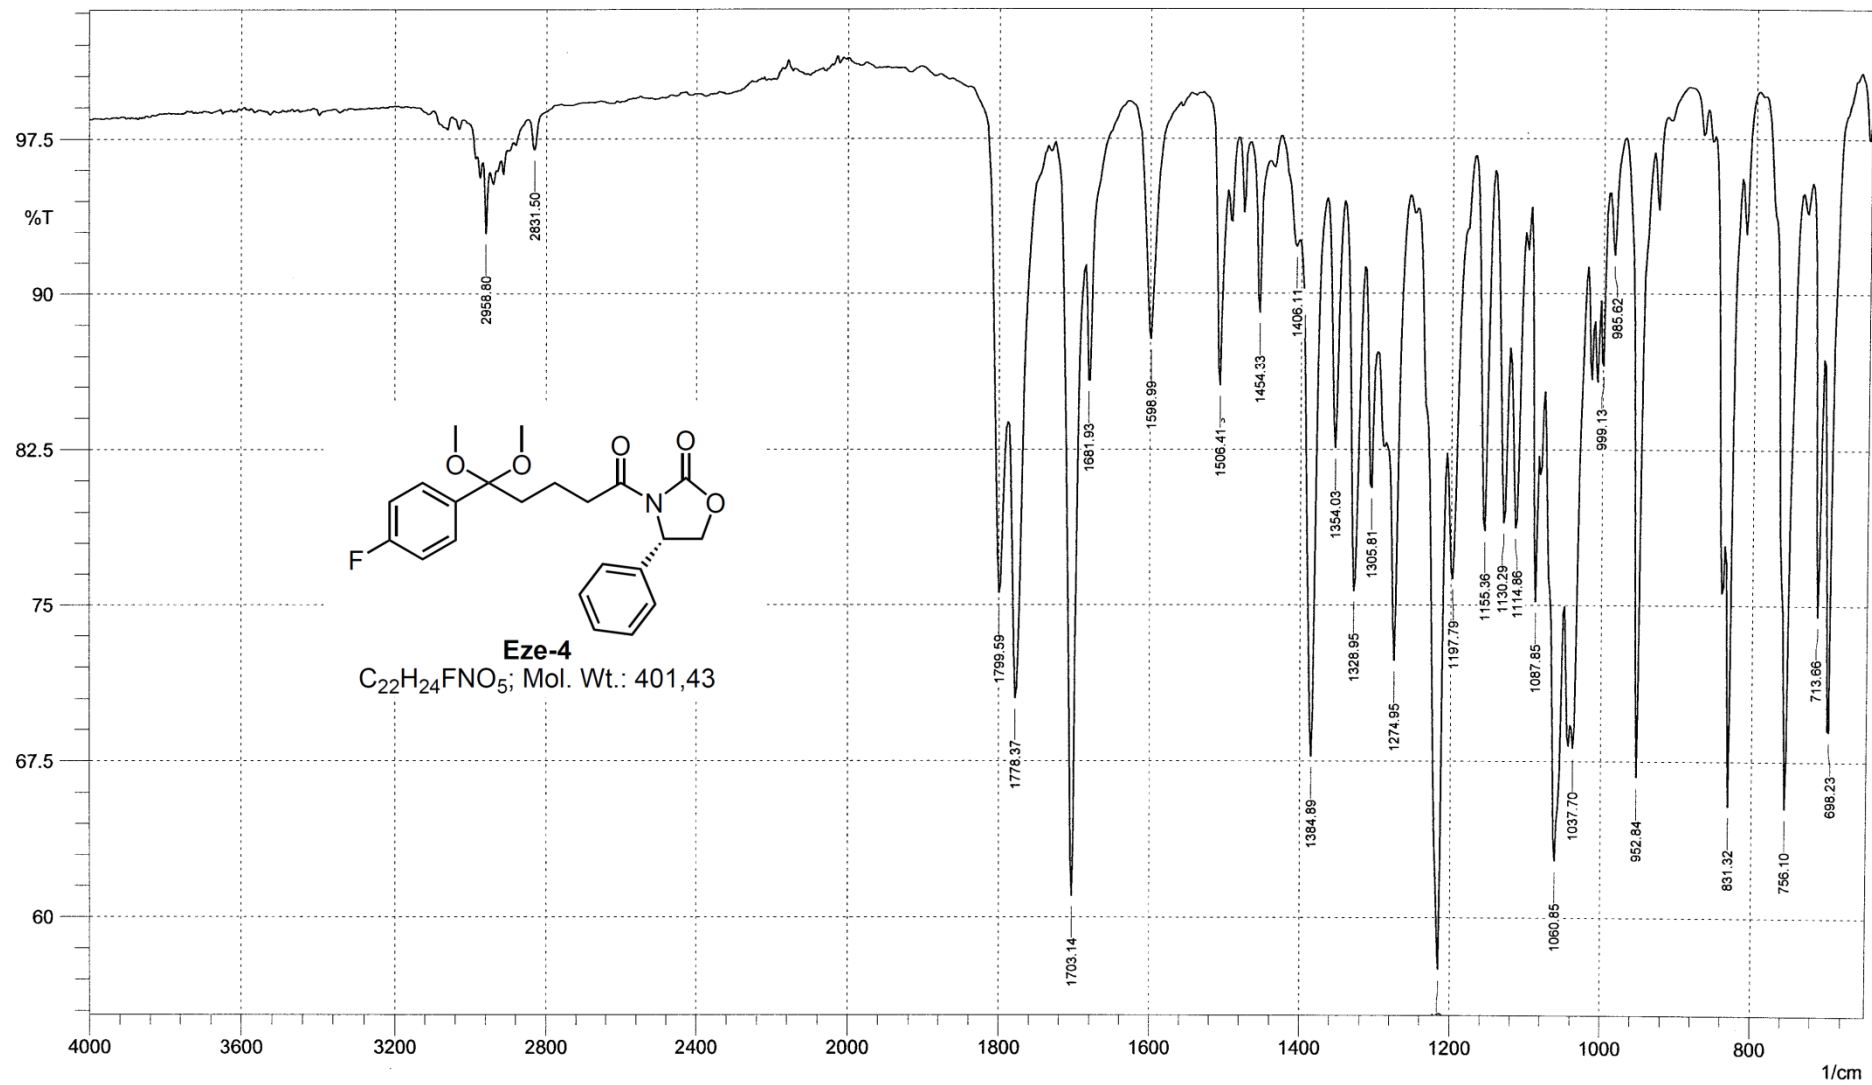

STANDARD 1H OBSERVE

exp9 s2pu1

|                     |                |            |          |
|---------------------|----------------|------------|----------|
| SAMPLE              |                | SPECIAL    |          |
| date                | Mar 10 2009    | temp       | not used |
| solvent             | CDC13          | gain       | not used |
| file                | /export/home/~ | spin       | 20       |
| vnmr1/vnmr          | sys/data~      | hst        | 0.008    |
| /EB.01.118-EZE22-C~ |                | pw90       | 14.500   |
| DCL3-H.fid          |                | alfa       | 20.000   |
| ACQUISITION         |                | FLAGS      |          |
| sw                  | 4798.5         | il         | n        |
| at                  | 1.998          | in         | n        |
| np                  | 19174          | dp         | y        |
| fb                  | 2600           | hs         | nn       |
| bs                  | 16             | PROCESSING |          |
| d1                  | 1.000          | fn         | not used |
| nt                  | 600            | DISPLAY    |          |
| ct                  | 600            | sp         | -599.4   |
| TRANSMITTER         |                | wp         | 4798.2   |
| tn                  | H1             | rf1        | 599.7    |
| sfrq                | 299.926        | rfp        | 0        |
| tof                 | 255.9          | rp         | 77.4     |
| tpwr                | 56             | lp         | -83.8    |
| pw                  | 7.250          | PLOT       |          |
| DECOUPLER           |                | wc         | 250      |
| dn                  | C13            | sc         | 0        |
| dof                 | 0              | vs         | 94       |
| dm                  | nnn            | th         | 54       |
| dmm                 | c              | ai         | cdc ph   |
| dpwr                | 41             |            |          |
| dmf                 | 13100          |            |          |

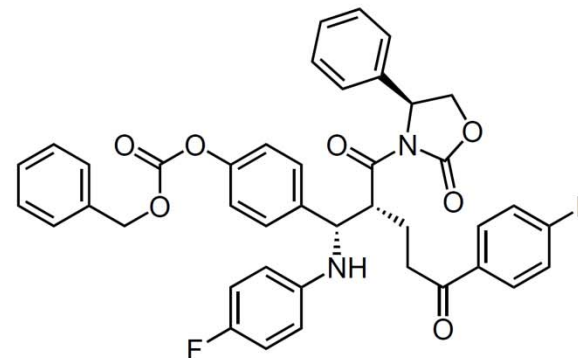

**Eze-5**  
 $C_{41}H_{34}F_2N_2O_7$ ; Mol. Wt.: 704,71

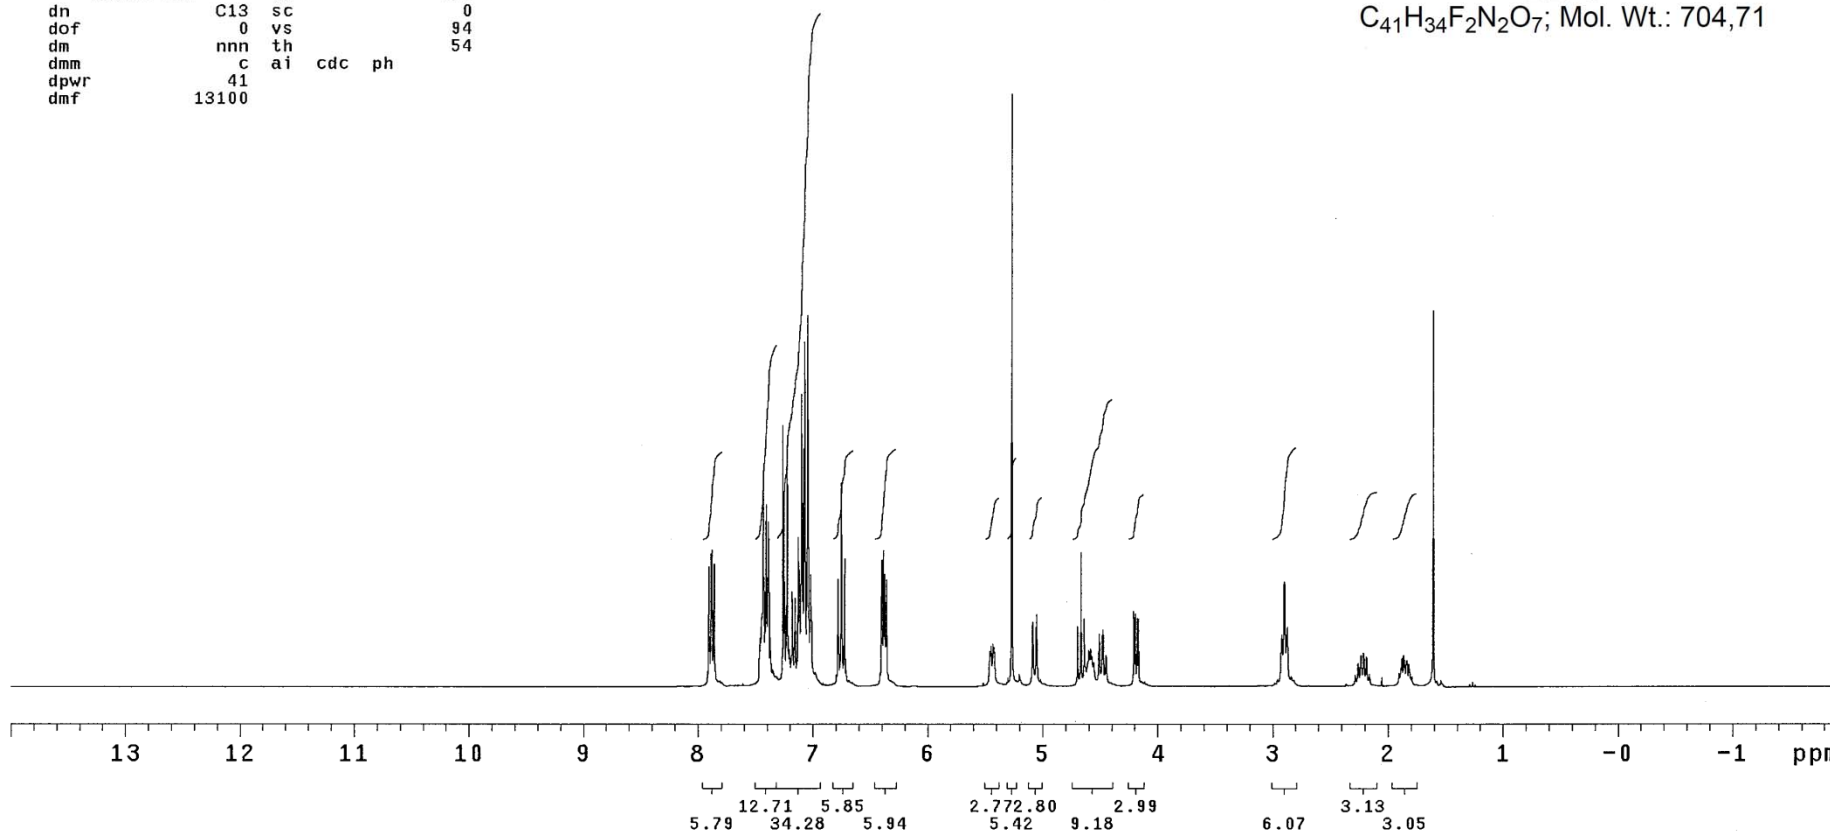

13C OBSERVE

exp9 s2pu1

| SAMPLE              |                | SPECIAL |          |
|---------------------|----------------|---------|----------|
| date                | Mar 10 2009    | temp    | not used |
| solvent             | CDC13          | gain    | not used |
| file                | /export/home/~ | spin    | 20       |
| vnmr1/vnmrsys/data~ |                | hst     | 0.008    |
| /EB.01.118-EZE22-C~ |                | pw90    | 14.200   |
| DCL3-C.fid          |                | alfa    | 20.000   |
| ACQUISITION         |                | FLAGS   |          |
| sw                  | 18867.9        | il      | n        |
| at                  | 1.815          | in      | n        |
| np                  | 68492          | dp      | y        |
| fb                  | 10400          | hs      | nn       |
| bs                  | 64             |         |          |
| PROCESSING          |                | lb      | 1.00     |
| d1                  | 1.000          | fn      | not used |
| nt                  | 5000           |         |          |
| ct                  | 3008           | DISPLAY |          |
| TRANSMITTER         |                | sp      | -1137.9  |
| tn                  | C13            | wp      | 18867.6  |
| sfrq                | 75.424         | rfl     | 1138.2   |
| tof                 | 725.6          | rfp     | 0        |
| tpwr                | 56             | rp      | -55.3    |
| pw                  | 7.100          | lp      | -247.8   |
| DECOUPLER           |                | PLOT    |          |
| dn                  | H1             | wc      | 250      |
| dof                 | 0              | sc      | 0        |
| dm                  | yyy            | vs      | 206      |
| dmm                 | w              | th      | 177      |
| dpwr                | 36             | ai      | no ph    |
| dmf                 | 6500           |         |          |

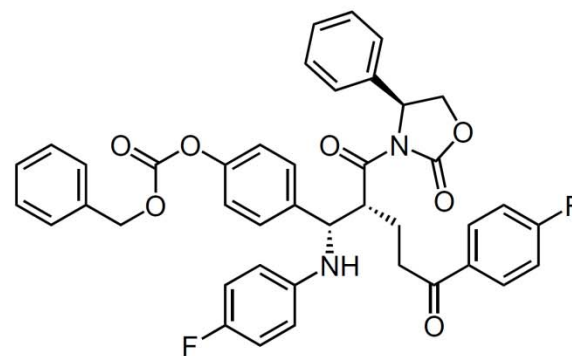

**Eze-5**  
C<sub>41</sub>H<sub>34</sub>F<sub>2</sub>N<sub>2</sub>O<sub>7</sub>; Mol. Wt.: 704,71

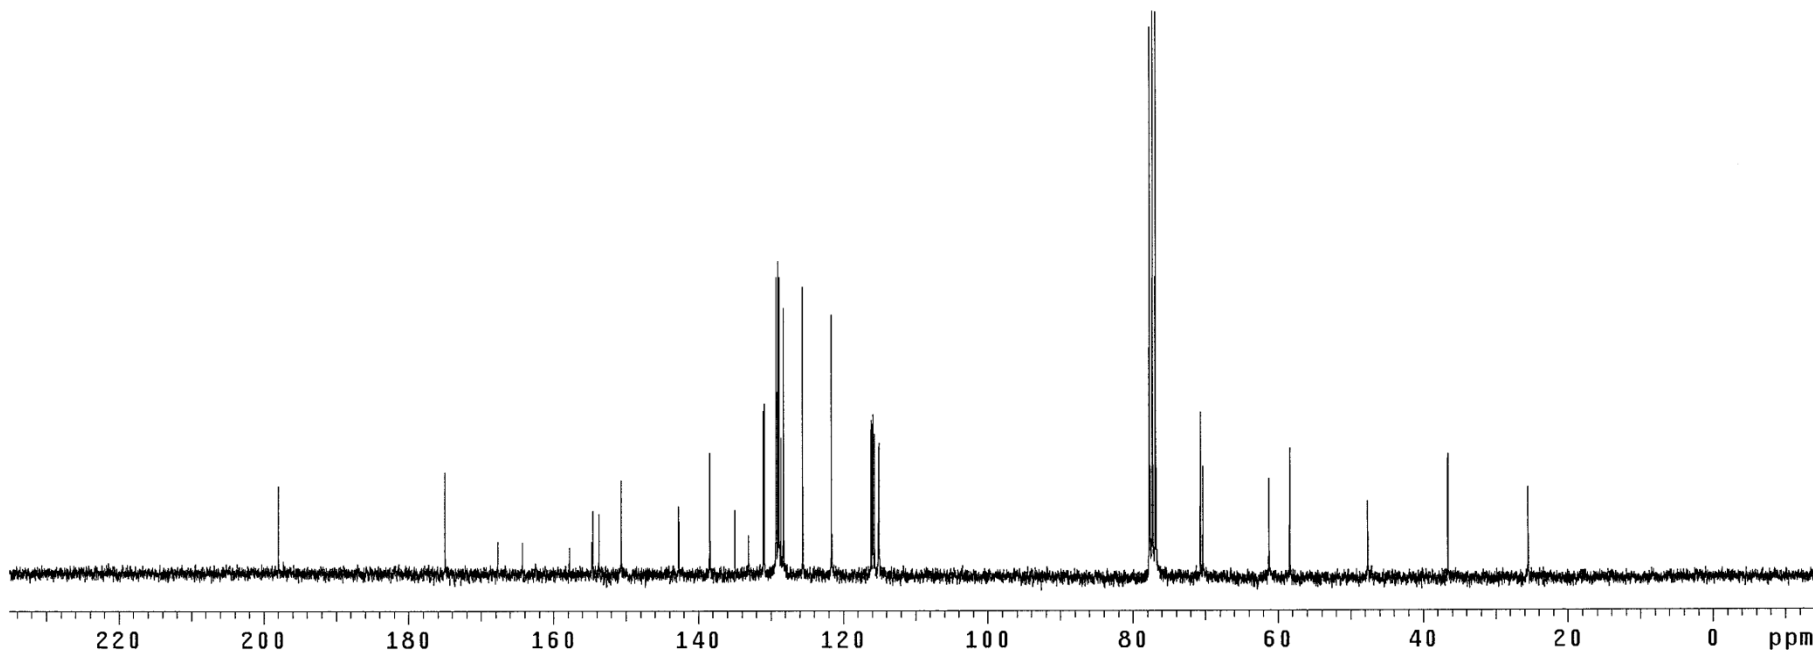

EZE

EZE + 1 (1.019)

Scan ES+  
4.10e8

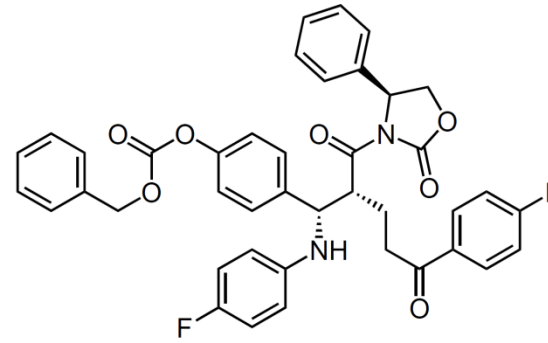

**Eze-5**

$C_{41}H_{34}F_2N_2O_7$ ; Mol. Wt.: 704,71

705.53

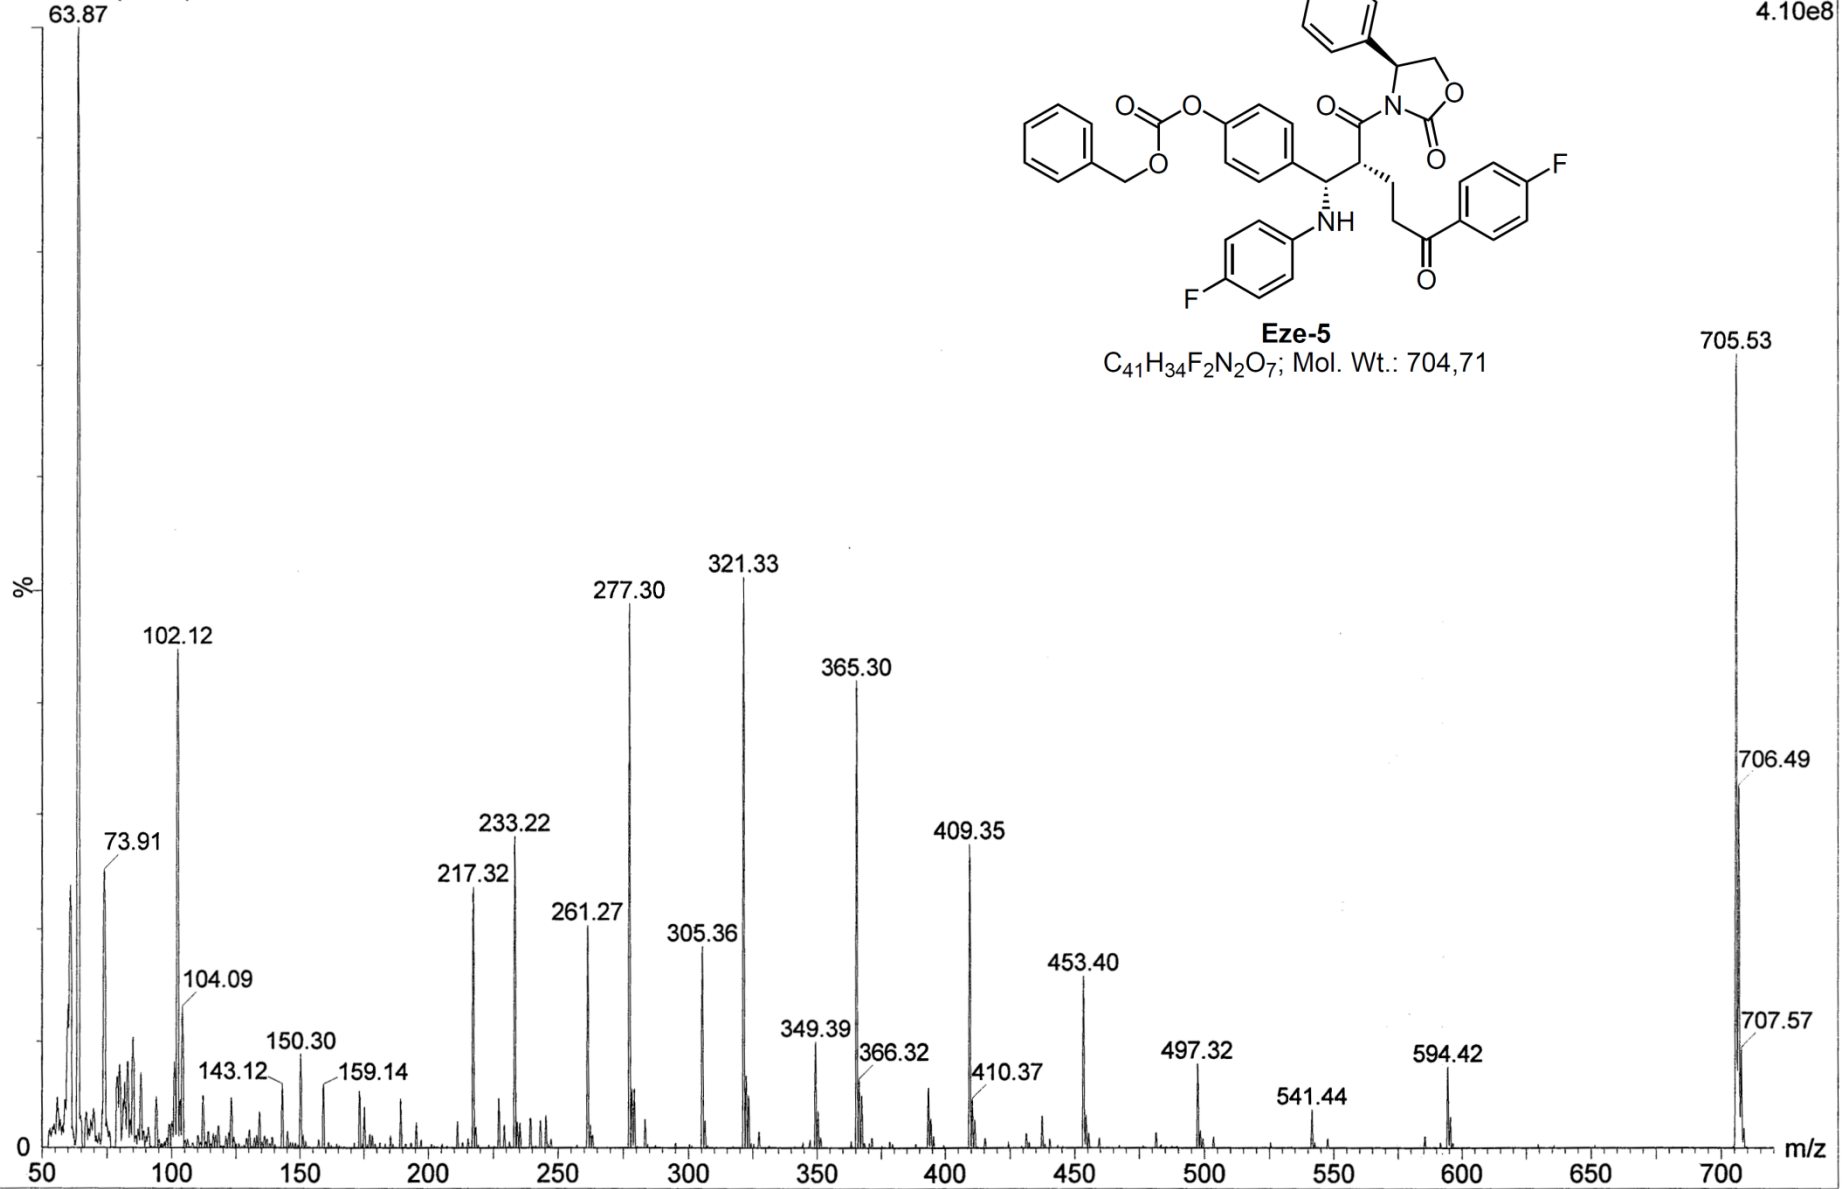

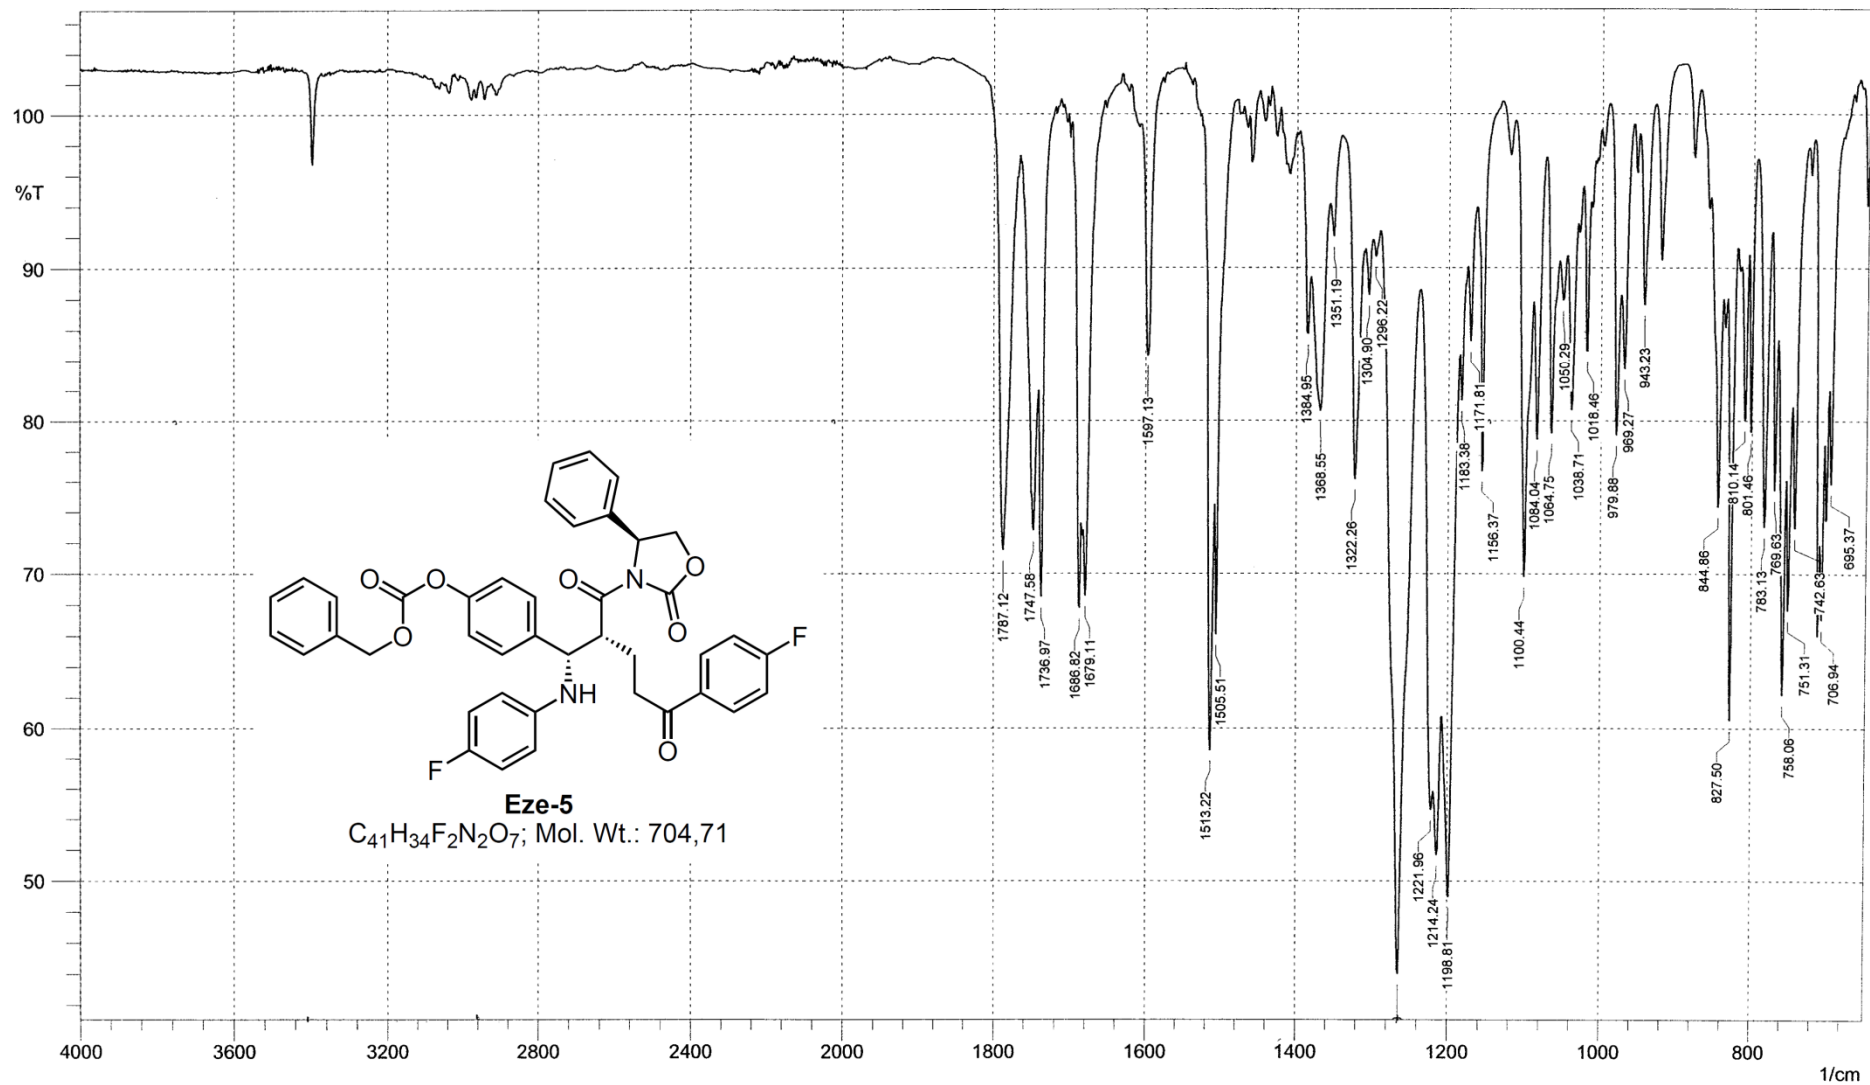

**Eze-5**  
 $C_{41}H_{34}F_2N_2O_7$ ; Mol. Wt.: 704,71

STANDARD 1H OBSERVE

exp5 s2pu1

|                     |                |            |          |
|---------------------|----------------|------------|----------|
| SAMPLE              |                | SPECIAL    |          |
| date                | Jan 21 2010    | temp       | not used |
| solvent             | CDC13          | gain       | not used |
| file                | /export/home/~ | spin       | 20       |
| vnmr1/vnmrsys/data~ |                | hst        | 0.008    |
| /EB.01.138-CDCL3-H~ |                | pw90       | 14.500   |
|                     | .fid           | alfa       | 20.000   |
| ACQUISITION         |                | FLAGS      |          |
| sw                  | 4798.5         | il         | n        |
| at                  | 1.998          | in         | n        |
| np                  | 19174          | dp         | y        |
| fb                  | 2600           | hs         | nn       |
| bs                  | 16             | PROCESSING |          |
| d1                  | 1.000          | fn         | not used |
| nt                  | 1200           | DISPLAY    |          |
| ct                  | 1200           | sp         | -599.4   |
| TRANSMITTER         |                | wp         | 4798.2   |
| tn                  | H1             | rf1        | 599.7    |
| sfrq                | 299.926        | rfp        | 0        |
| tof                 | 255.9          | rp         | 129.1    |
| tpwr                | 56             | lp         | -38.7    |
| pw                  | 7.250          | PLOT       |          |
| DECOUPLER           |                | wc         | 250      |
| dn                  | C13            | sc         | 0        |
| dof                 | 0              | vs         | 373      |
| dm                  | nnn            | th         | 177      |
| dmm                 | c              | ai         | cdc ph   |
| dpwr                | 41             |            |          |
| dmf                 | 13100          |            |          |

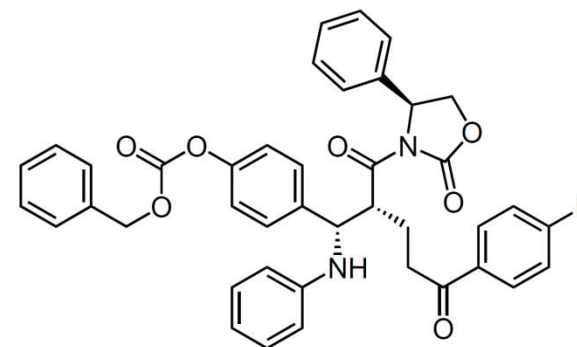

**desfluoro Eze-5**  
 $C_{41}H_{35}FN_2O_7$ ; Mol. Wt.: 686,72

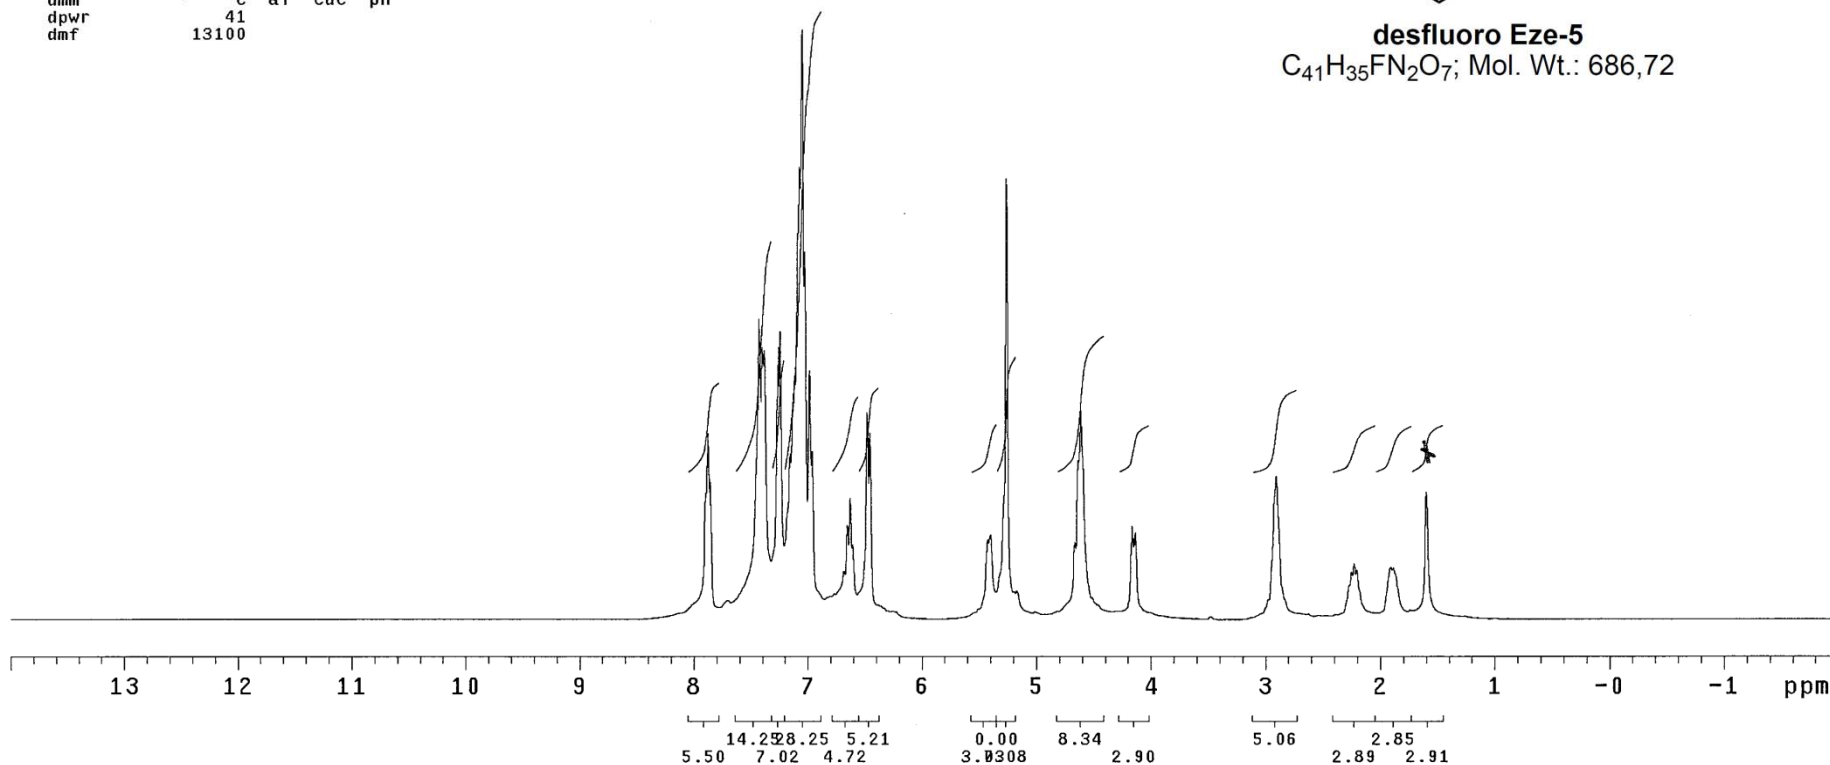

13C OBSERVE

exp5 s2pu1

| SAMPLE              |                | SPECIAL |          |
|---------------------|----------------|---------|----------|
| date                | Jan 21 2010    | temp    | not used |
| solvent             | CDC13          | gain    | not used |
| file                | /export/home/~ | spin    | 20       |
| vnmr1/vnmrsys/data~ |                | hst     | 0.008    |
| /EB.01.138-CDCL3-C~ |                | pw90    | 14.200   |
| .fid                | alfa           |         | 20.000   |

  

| ACQUISITION |         | FLAGS |    |
|-------------|---------|-------|----|
| sw          | 18867.9 | il    | n  |
| at          | 1.815   | in    | n  |
| np          | 68492   | dp    | y  |
| fb          | 10400   | hs    | nn |
| bs          | 64      |       |    |

  

| PROCESSING |       |
|------------|-------|
| d1         | 1.000 |
| nt         | 30000 |
| ct         | 30000 |

  

| TRANSMITTER |        | DISPLAY |         |
|-------------|--------|---------|---------|
| tn          | C13    | sp      | -1032.0 |
| sfrq        | 75.424 | wp      | 18761.7 |
| tof         | 725.6  | rf1     | 1138.2  |
| tpwr        | 56     | rfp     | 0       |
| pw          | 7.100  | rp      | -76.0   |
|             |        | lp      | -234.1  |

  

| DECOUPLER |      | PLOT |     |
|-----------|------|------|-----|
| dn        | H1   | wc   | 250 |
| dof       | 0    | sc   | 0   |
| dm        | yyy  | vs   | 661 |
| dmm       | w    | th   | 170 |
| dpwr      | 36   | ai   | no  |
| dmf       | 6500 | ph   |     |

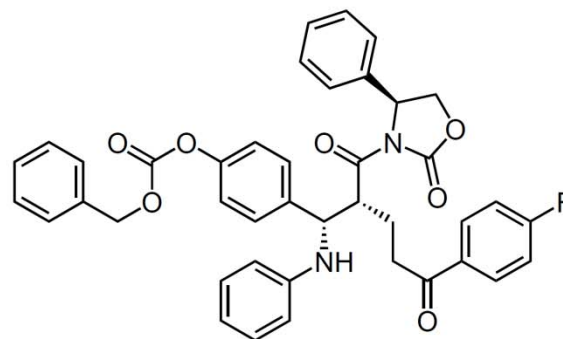

**desfluoro Eze-5**  
C<sub>41</sub>H<sub>35</sub>FN<sub>2</sub>O<sub>7</sub>; Mol. Wt.: 686,72

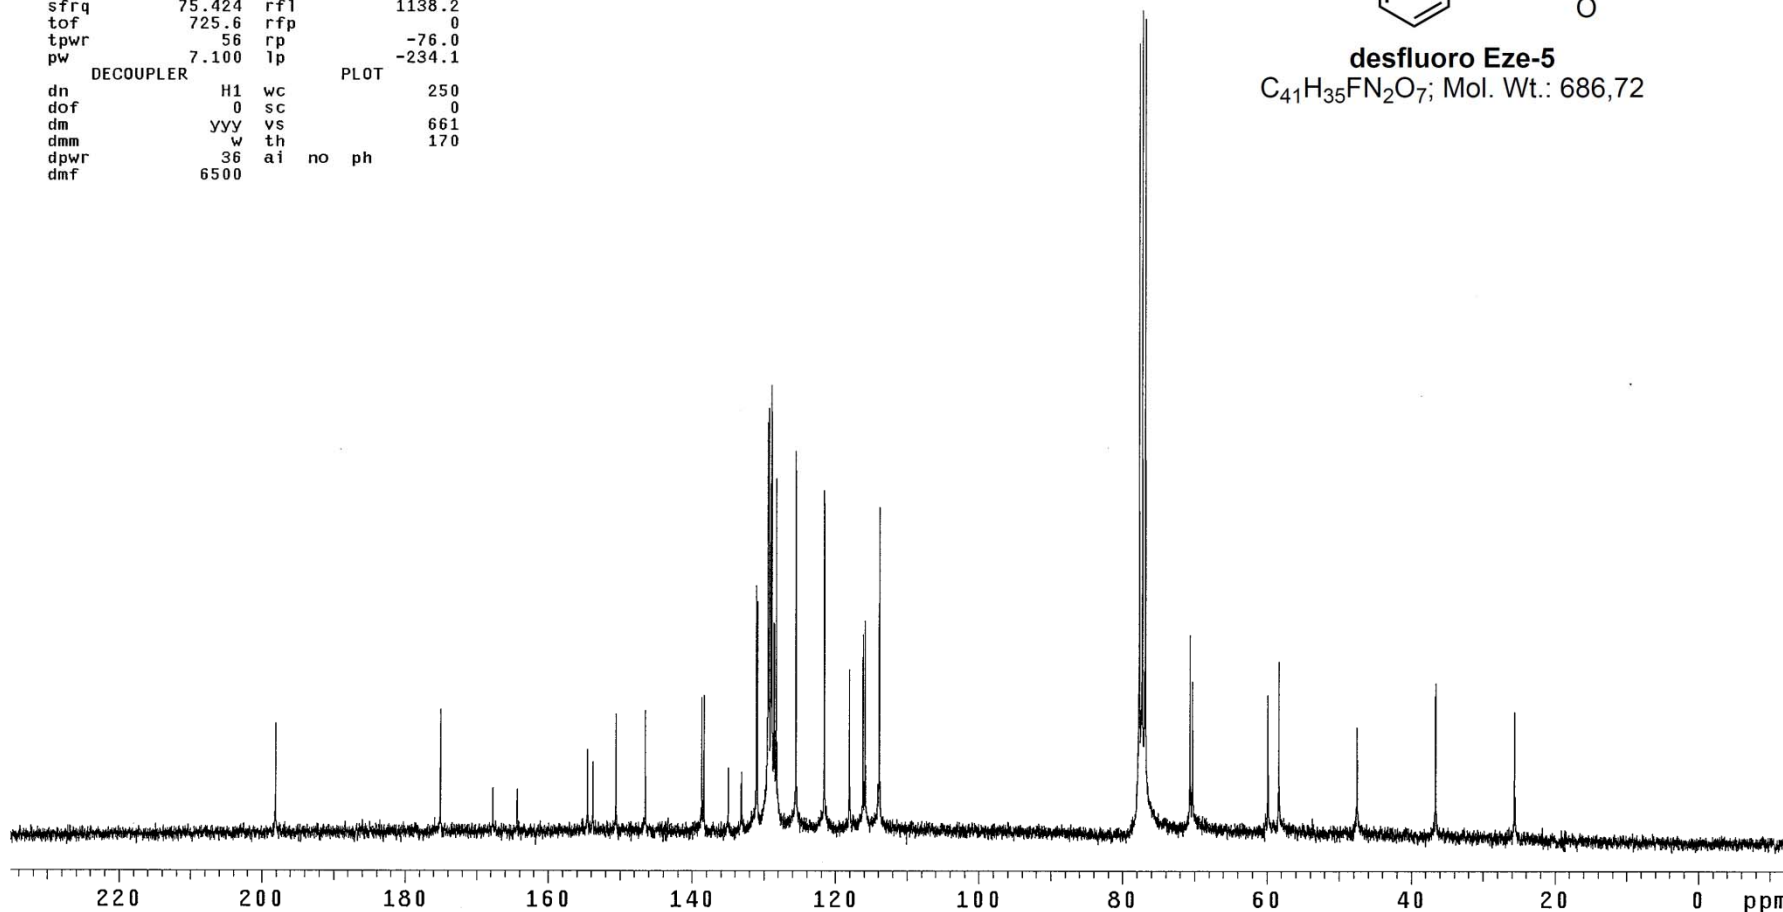



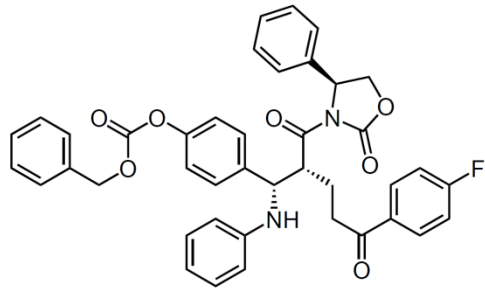

**desfluoro Eze-5**

C<sub>41</sub>H<sub>35</sub>FN<sub>2</sub>O<sub>7</sub>; Mol. Wt.: 686,72

CH3 carbons

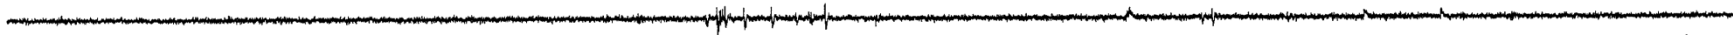

CH2 carbons

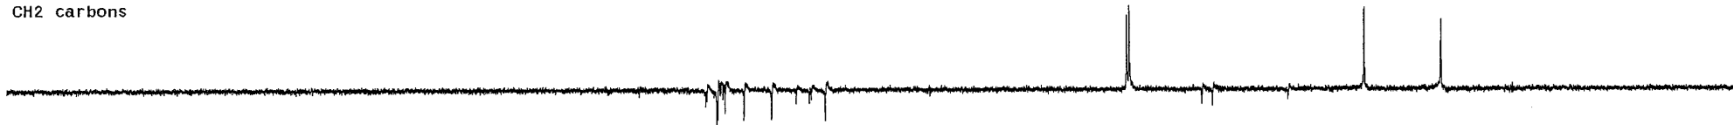

CH carbons

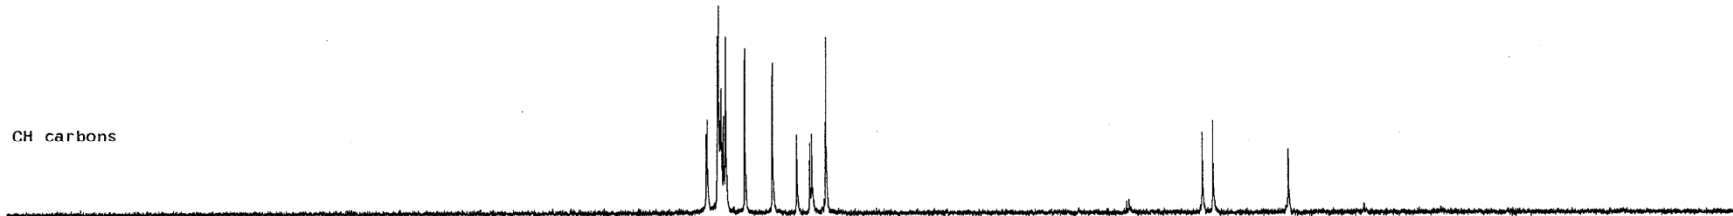

all protonated carbons

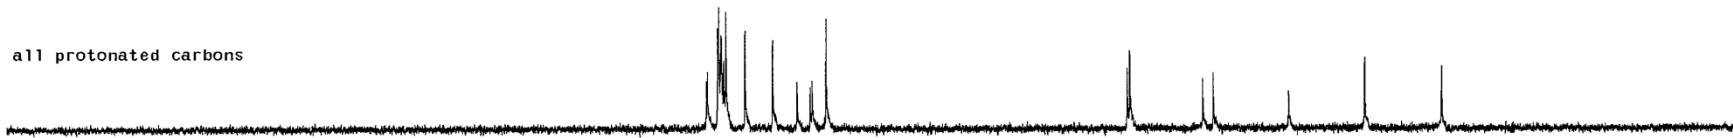

220 200 180 160 140 120 100 80 60 40 20 0 ppm

EB01138

EB01138 1 (1.019)

94.07

Scan ES+  
6.79e8

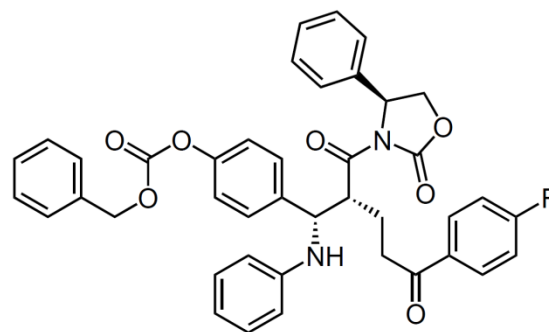

**desfluoro Eze-5**

C<sub>41</sub>H<sub>35</sub>FN<sub>2</sub>O<sub>7</sub>; Mol. Wt.: 686,72

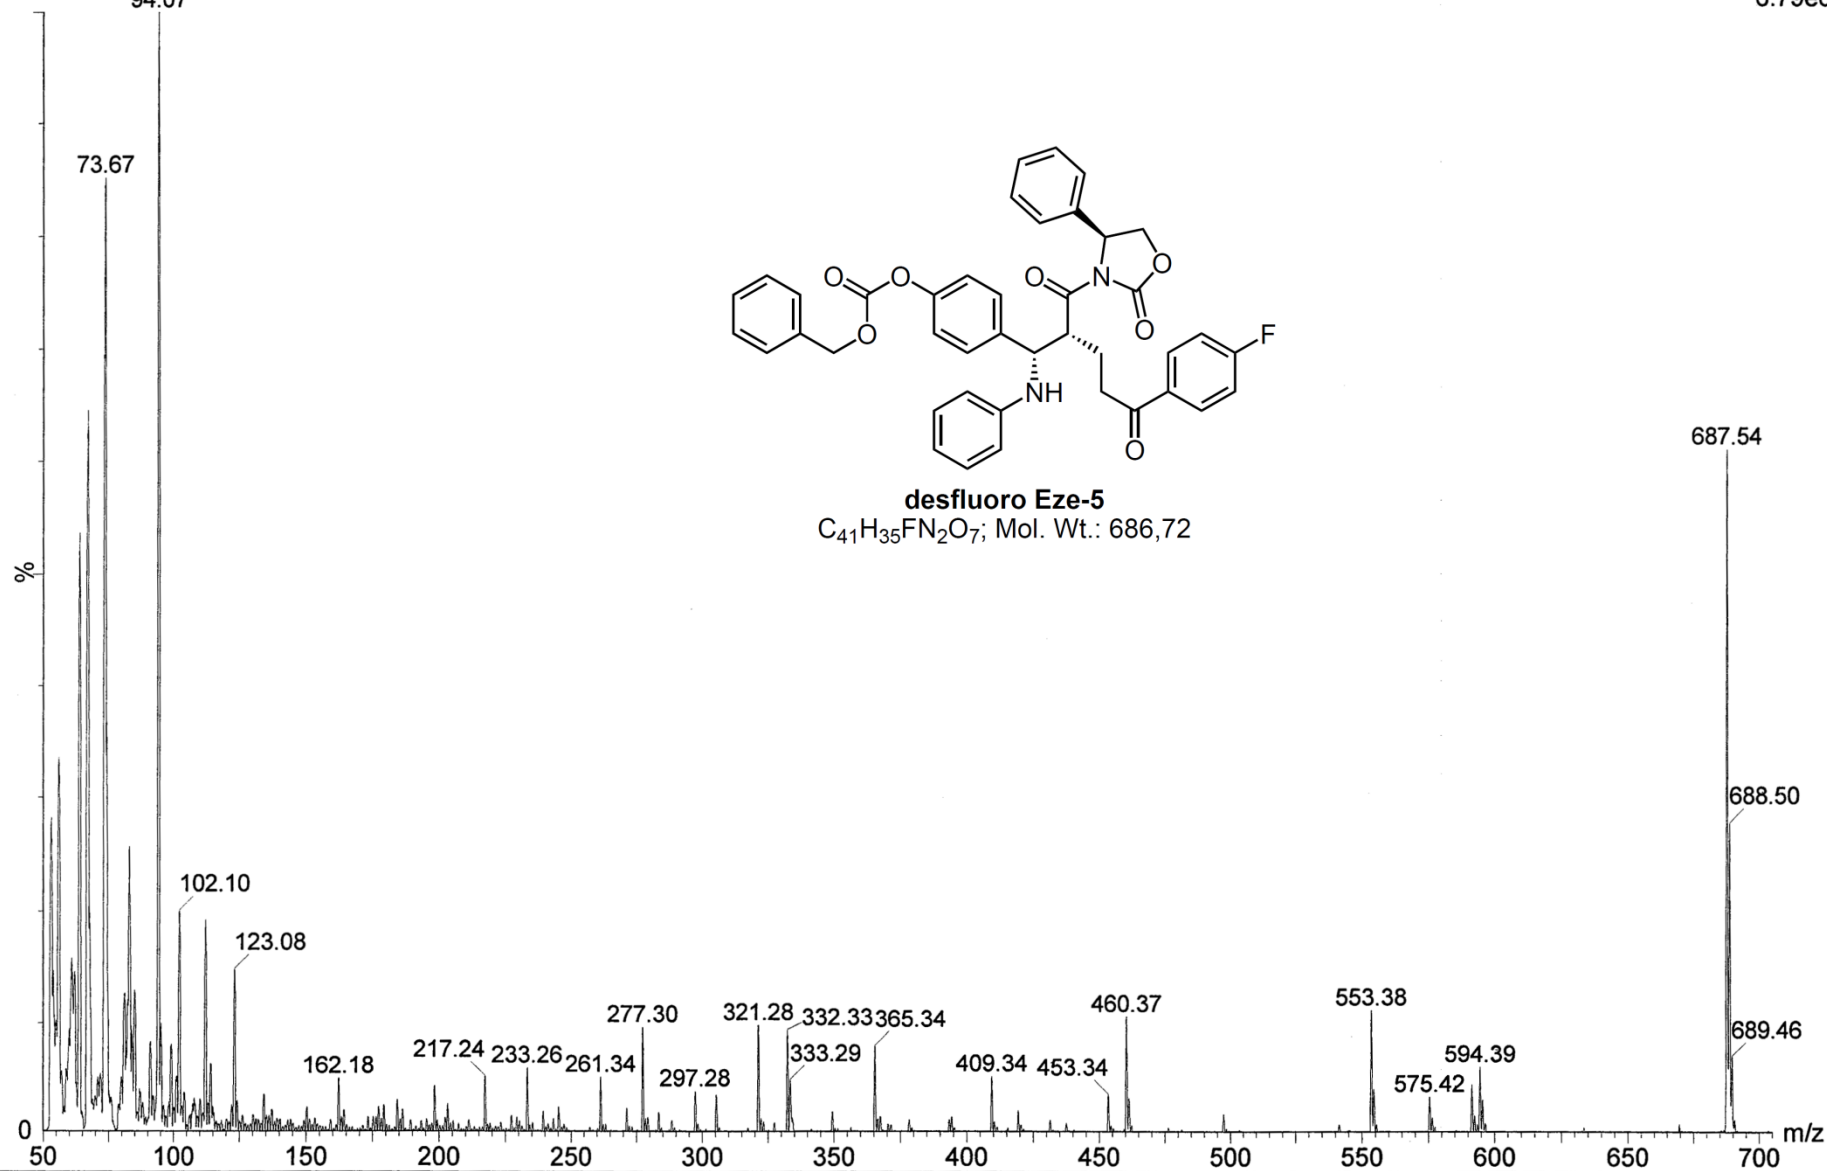

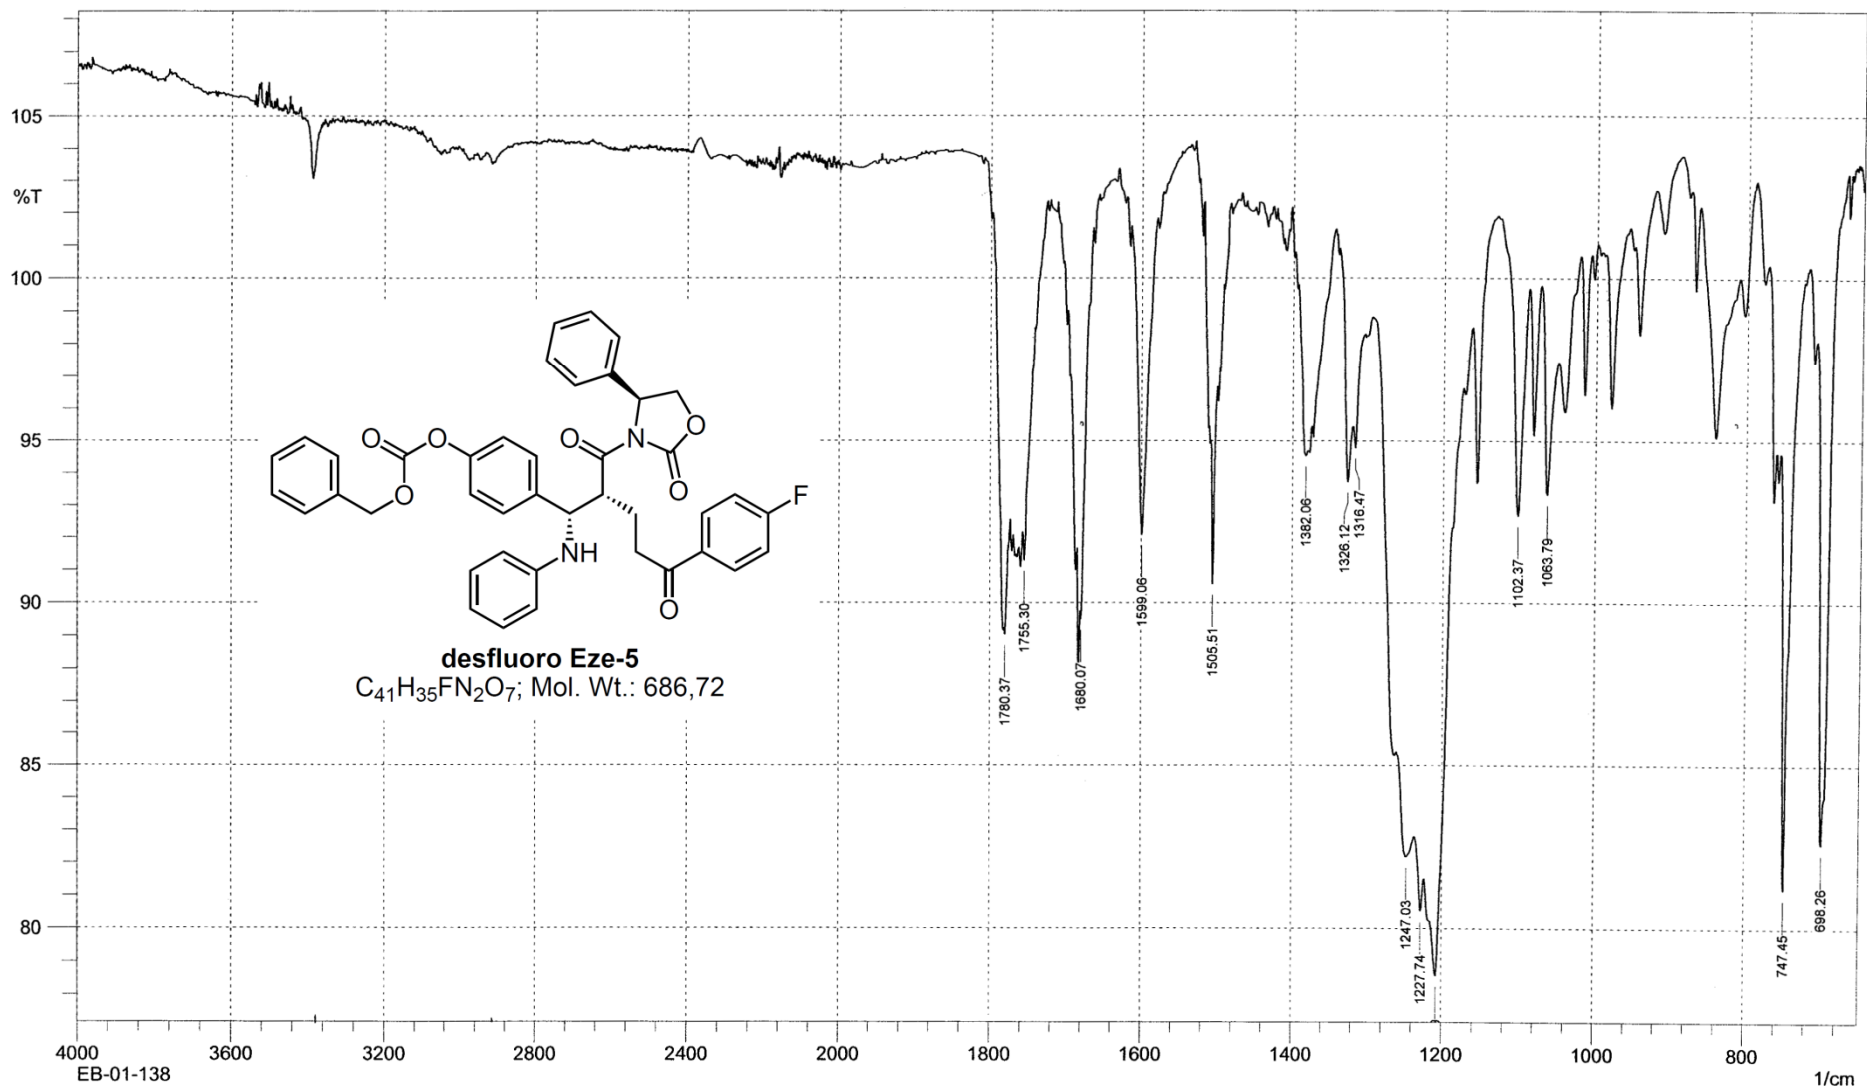

STANDARD 1H OBSERVE

exp7 s2pu1

|                     |                |            |          |
|---------------------|----------------|------------|----------|
| SAMPLE              |                | SPECIAL    |          |
| date                | Apr 6 2009     | temp       | not used |
| solvent             | CDC13          | gain       | not used |
| file                | /export/home/~ | spin       | 20       |
| vnmr1/vnmrSYS/data~ |                | hst        | 0.008    |
| /EB.01.122-EZE23-C~ |                | pw90       | 14.500   |
|                     | DCL3-H.fid     | alfa       | 20.000   |
| ACQUISITION         |                | FLAGS      |          |
| sw                  | 4798.5         | il         | n        |
| at                  | 1.998          | in         | n        |
| np                  | 19174          | dp         | y        |
| fb                  | 2600           | hs         | nn       |
| bs                  | 16             | PROCESSING |          |
| d1                  | 1.000          | fn         | not used |
| nt                  | 1200           | DISPLAY    |          |
| ct                  | 736            | sp         | -599.4   |
| TRANSMITTER         |                | wp         | 4798.2   |
| tn                  | H1             | rfl        | 599.7    |
| sfrq                | 299.926        | rfp        | 0        |
| tof                 | 255.9          | rp         | 66.0     |
| tpwr                | 56             | lp         | -65.1    |
| pw                  | 7.250          | PLOT       |          |
| DECOUPLER           |                | wc         | 250      |
| dn                  | C13            | sc         | 0        |
| dof                 | 0              | vs         | 193      |
| dm                  | nnn            | th         | 169      |
| dmm                 | c              | ai         | cdc ph   |
| dpwr                | 41             |            |          |
| dmf                 | 13100          |            |          |

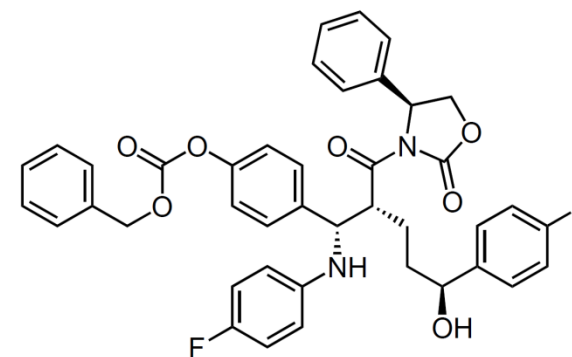

**Eze-6**  
 $C_{41}H_{36}F_2N_2O_7$ ; Mol. Wt.: 706,73

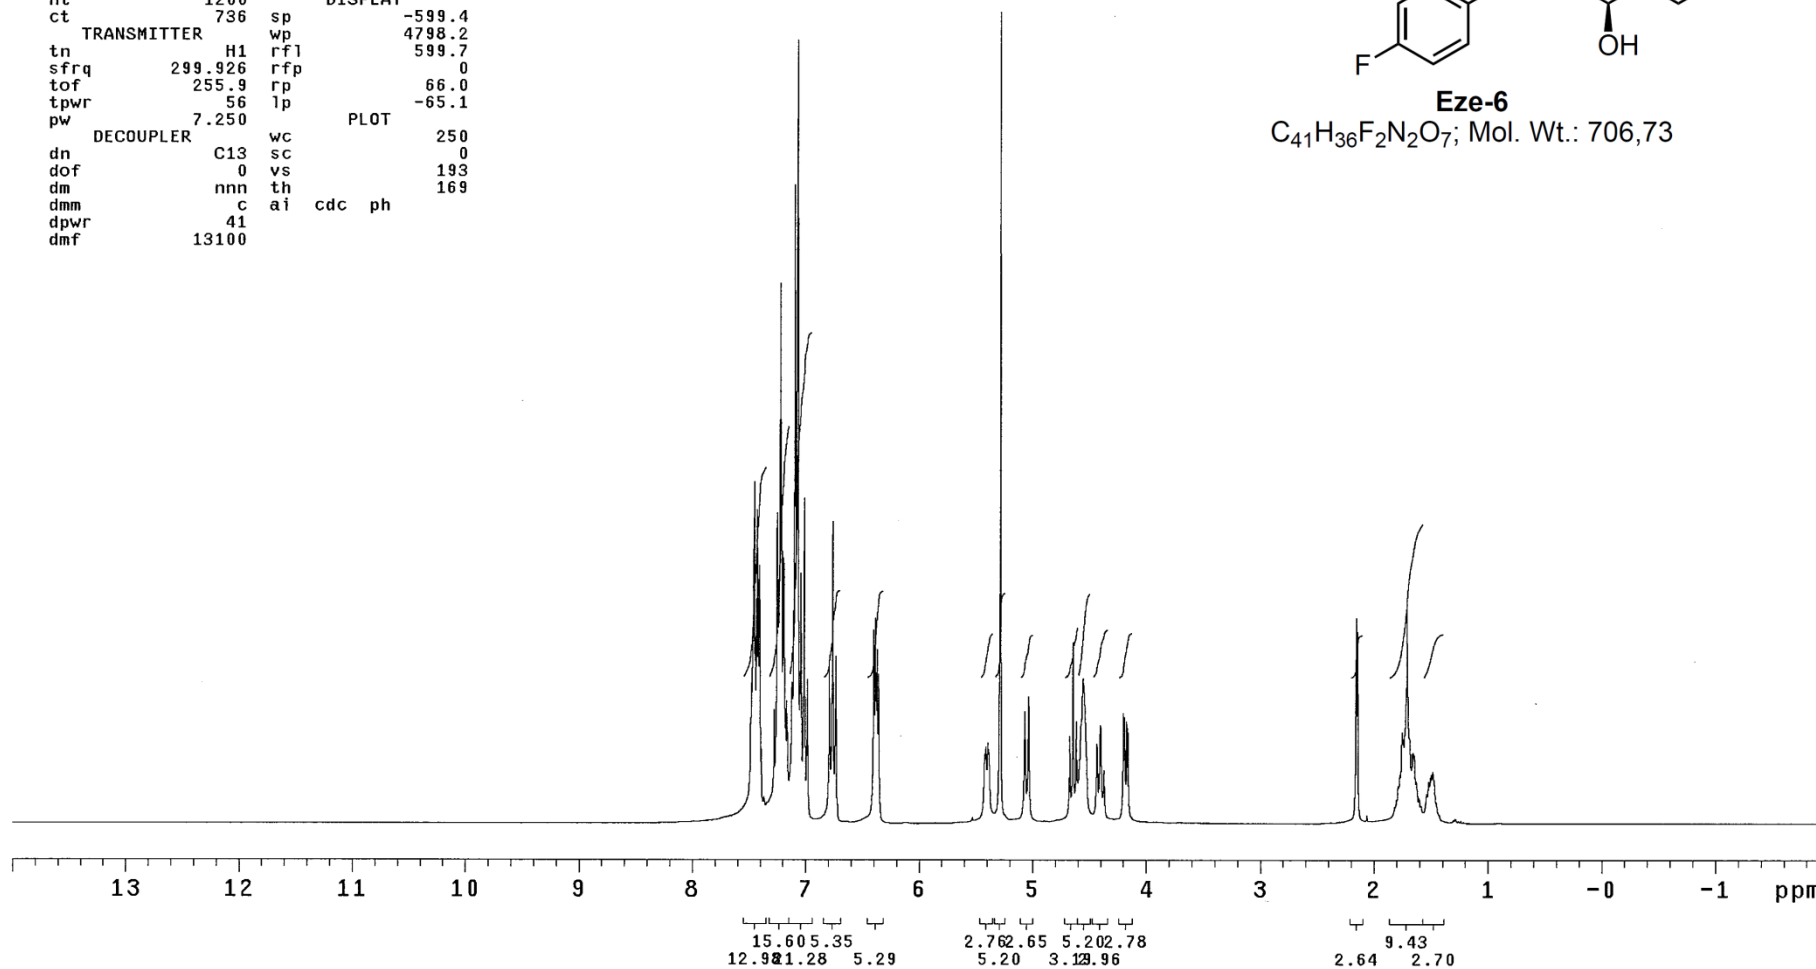

13C OBSERVE

exp9 s2pu1

|                     |                |            |          |
|---------------------|----------------|------------|----------|
| SAMPLE              |                | SPECIAL    |          |
| date                | Apr 6 2009     | temp       | not used |
| solvent             | CDC13          | gain       | not used |
| file                | /export/home/~ | spin       | 20       |
| vnmr1/vnmrsys/data~ |                | hst        | 0.008    |
| /EB.01.122-EZE23-C~ |                | pw90       | 14.200   |
|                     | DCL3-C.fid     | a1fa       | 20.000   |
| ACQUISITION         |                | FLAGS      |          |
| sw                  | 18867.9        | il         | n        |
| at                  | 1.815          | in         | n        |
| np                  | 68492          | dp         | y        |
| fb                  | 10400          | hs         | nn       |
| bs                  | 64             | PROCESSING |          |
| d1                  | 1.000          | lb         | 1.00     |
| nt                  | 50000          | fn         | not used |
| ct                  | 3776           | DISPLAY    |          |
| TRANSMITTER         |                | sp         | -1137.9  |
| tn                  | C13            | wp         | 18867.6  |
| sfrq                | 75.424         | rfl        | 1138.2   |
| tof                 | 725.6          | rfp        | 0        |
| tpwr                | 56             | rp         | -61.8    |
| pw                  | 7.100          | lp         | -227.9   |
| DECOUPLER           |                | PLOT       |          |
| dn                  | H1             | wc         | 250      |
| dof                 | 0              | sc         | 0        |
| dm                  | YY             | vs         | 123      |
| dmm                 | w              | th         | 178      |
| dpwr                | 36             | ai         | no       |
| dmf                 | 6500           | ph         |          |

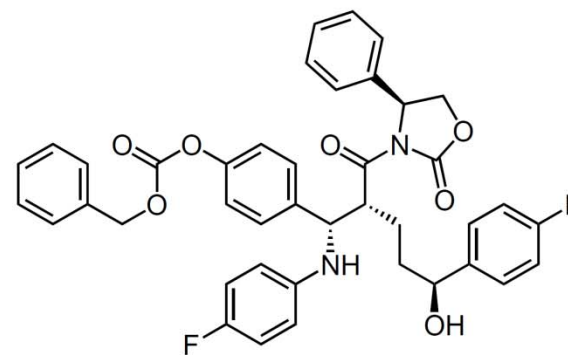

**Eze-6**  
 $C_{41}H_{36}F_2N_2O_7$ ; Mol. Wt.: 706,73

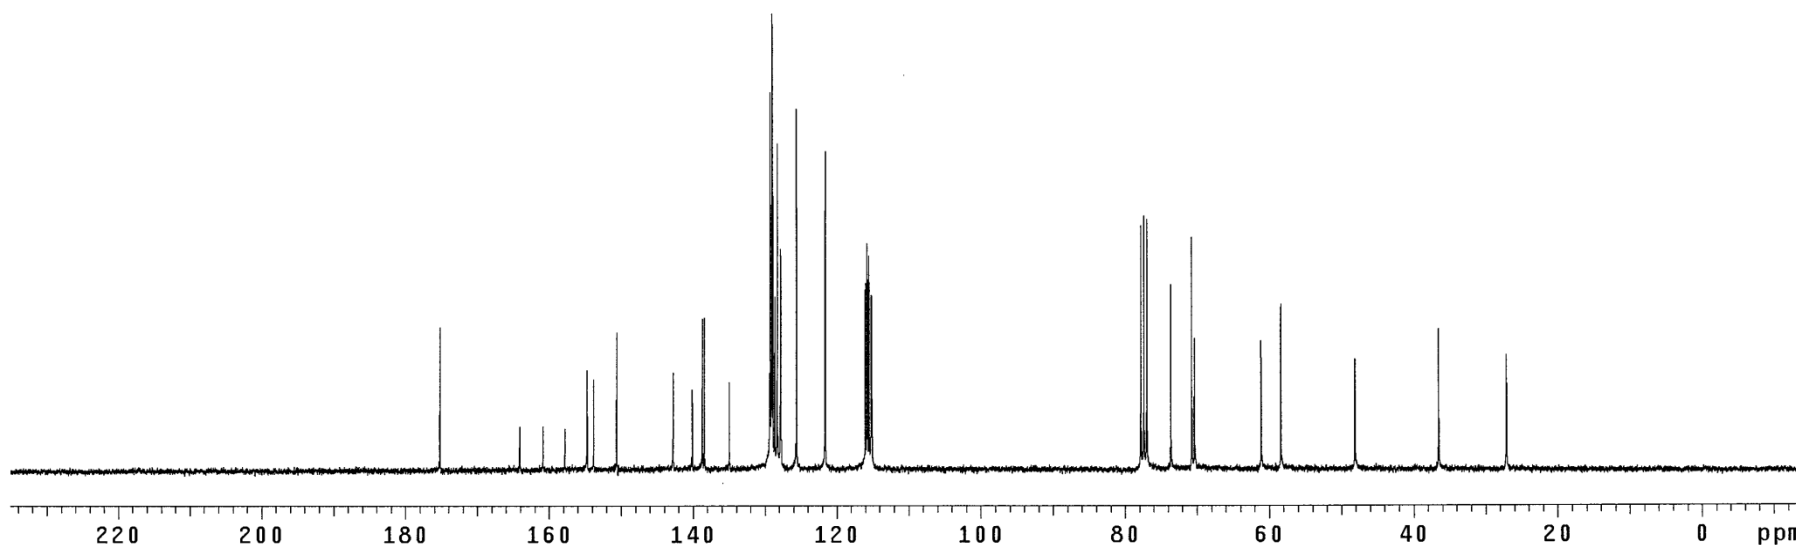

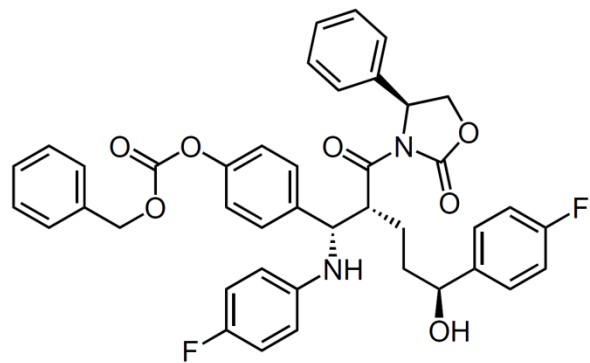

**Eze-6**  
 $C_{41}H_{36}F_2N_2O_7$ ; Mol. Wt.: 706,73

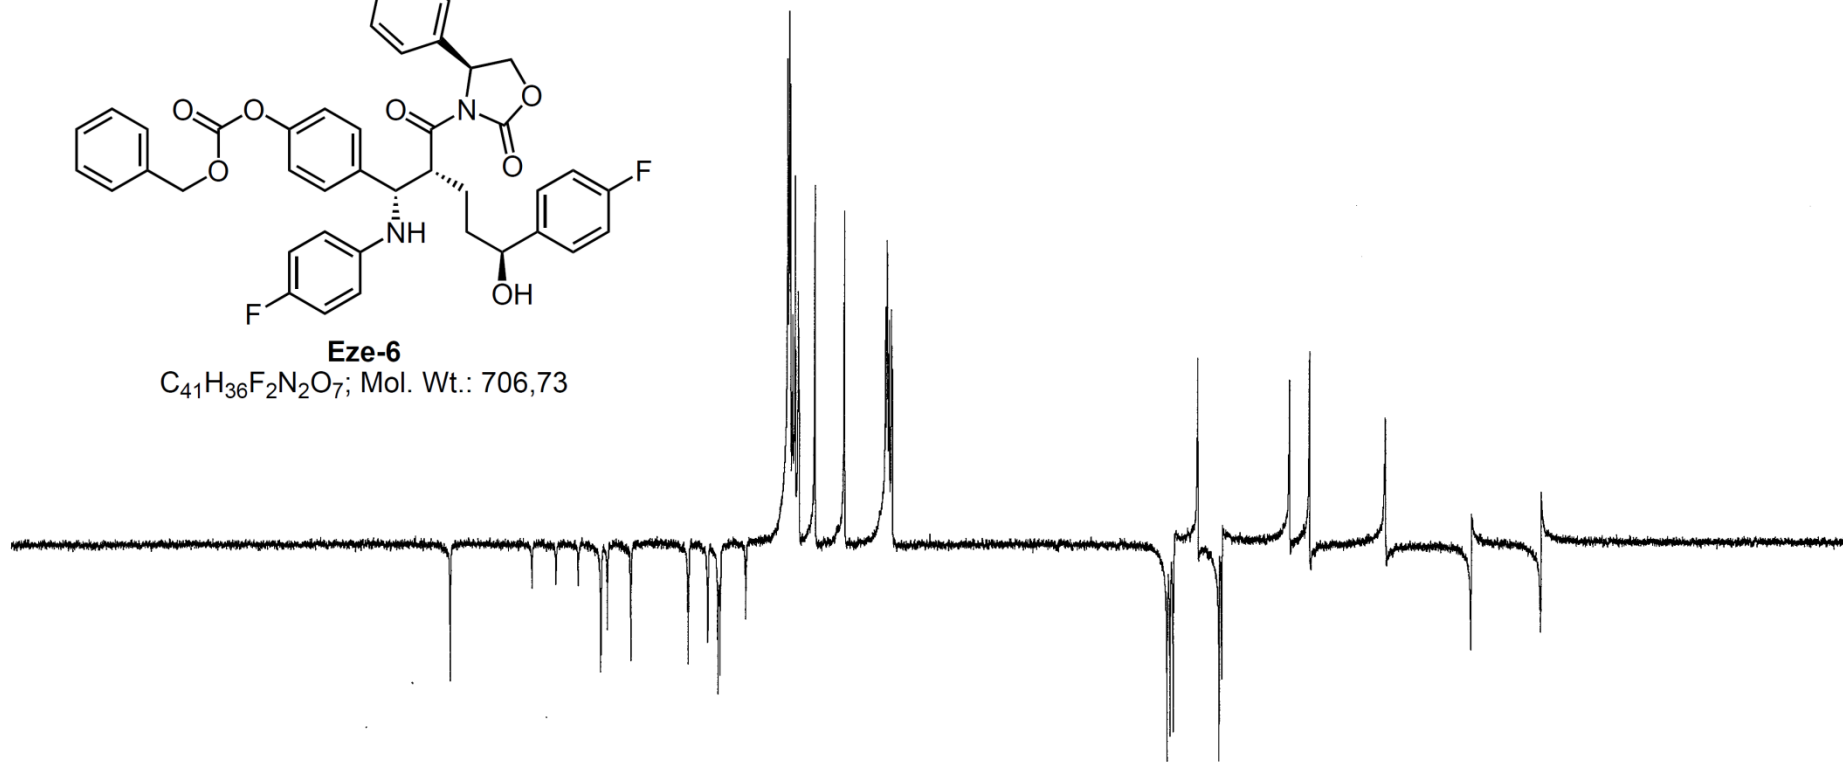

220 200 180 160 140 120 100 80 60 40 20 0 ppm

|                                                                                                                                                                                                                                       |                                                                                                                                                                  |                                                                                                                           |                                                                                                                                                                                                |
|---------------------------------------------------------------------------------------------------------------------------------------------------------------------------------------------------------------------------------------|------------------------------------------------------------------------------------------------------------------------------------------------------------------|---------------------------------------------------------------------------------------------------------------------------|------------------------------------------------------------------------------------------------------------------------------------------------------------------------------------------------|
| <p>PULSE SEQUENCE: APT<br/>         Relax. delay 1.000 sec<br/>         1st pulse 90.0 degrees<br/>         2nd pulse 135.0 degrees<br/>         Acq. time 1.815 sec<br/>         Width 18867.9 Hz<br/>         34560 repetitions</p> | <p>OBSERVE C13, 75.4159447<br/>         DECOUPLE H1, 299.9255951<br/>         Power 36 dB<br/>         on during acquisition<br/>         WALTZ-16 modulated</p> | <p>DATA PROCESSING<br/>         Line broadening 1.0 Hz<br/>         FT size 131072<br/>         Total time 27.0 hours</p> | <p>13C OBSERVE<br/><br/>         Archive directory: /expor<br/>         Sample directory:<br/>         Pulse Sequence: APT<br/>         Solvent: CDCl<sub>3</sub><br/>         Temperature</p> |
|---------------------------------------------------------------------------------------------------------------------------------------------------------------------------------------------------------------------------------------|------------------------------------------------------------------------------------------------------------------------------------------------------------------|---------------------------------------------------------------------------------------------------------------------------|------------------------------------------------------------------------------------------------------------------------------------------------------------------------------------------------|

EZE

EZE +++ 1 (1.019)

Scan ES+  
707.51 3.17e8

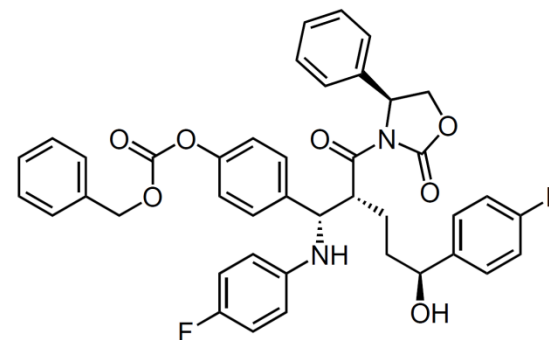

**Eze-6**  
C<sub>41</sub>H<sub>36</sub>F<sub>2</sub>N<sub>2</sub>O<sub>7</sub>; Mol. Wt.: 706,73

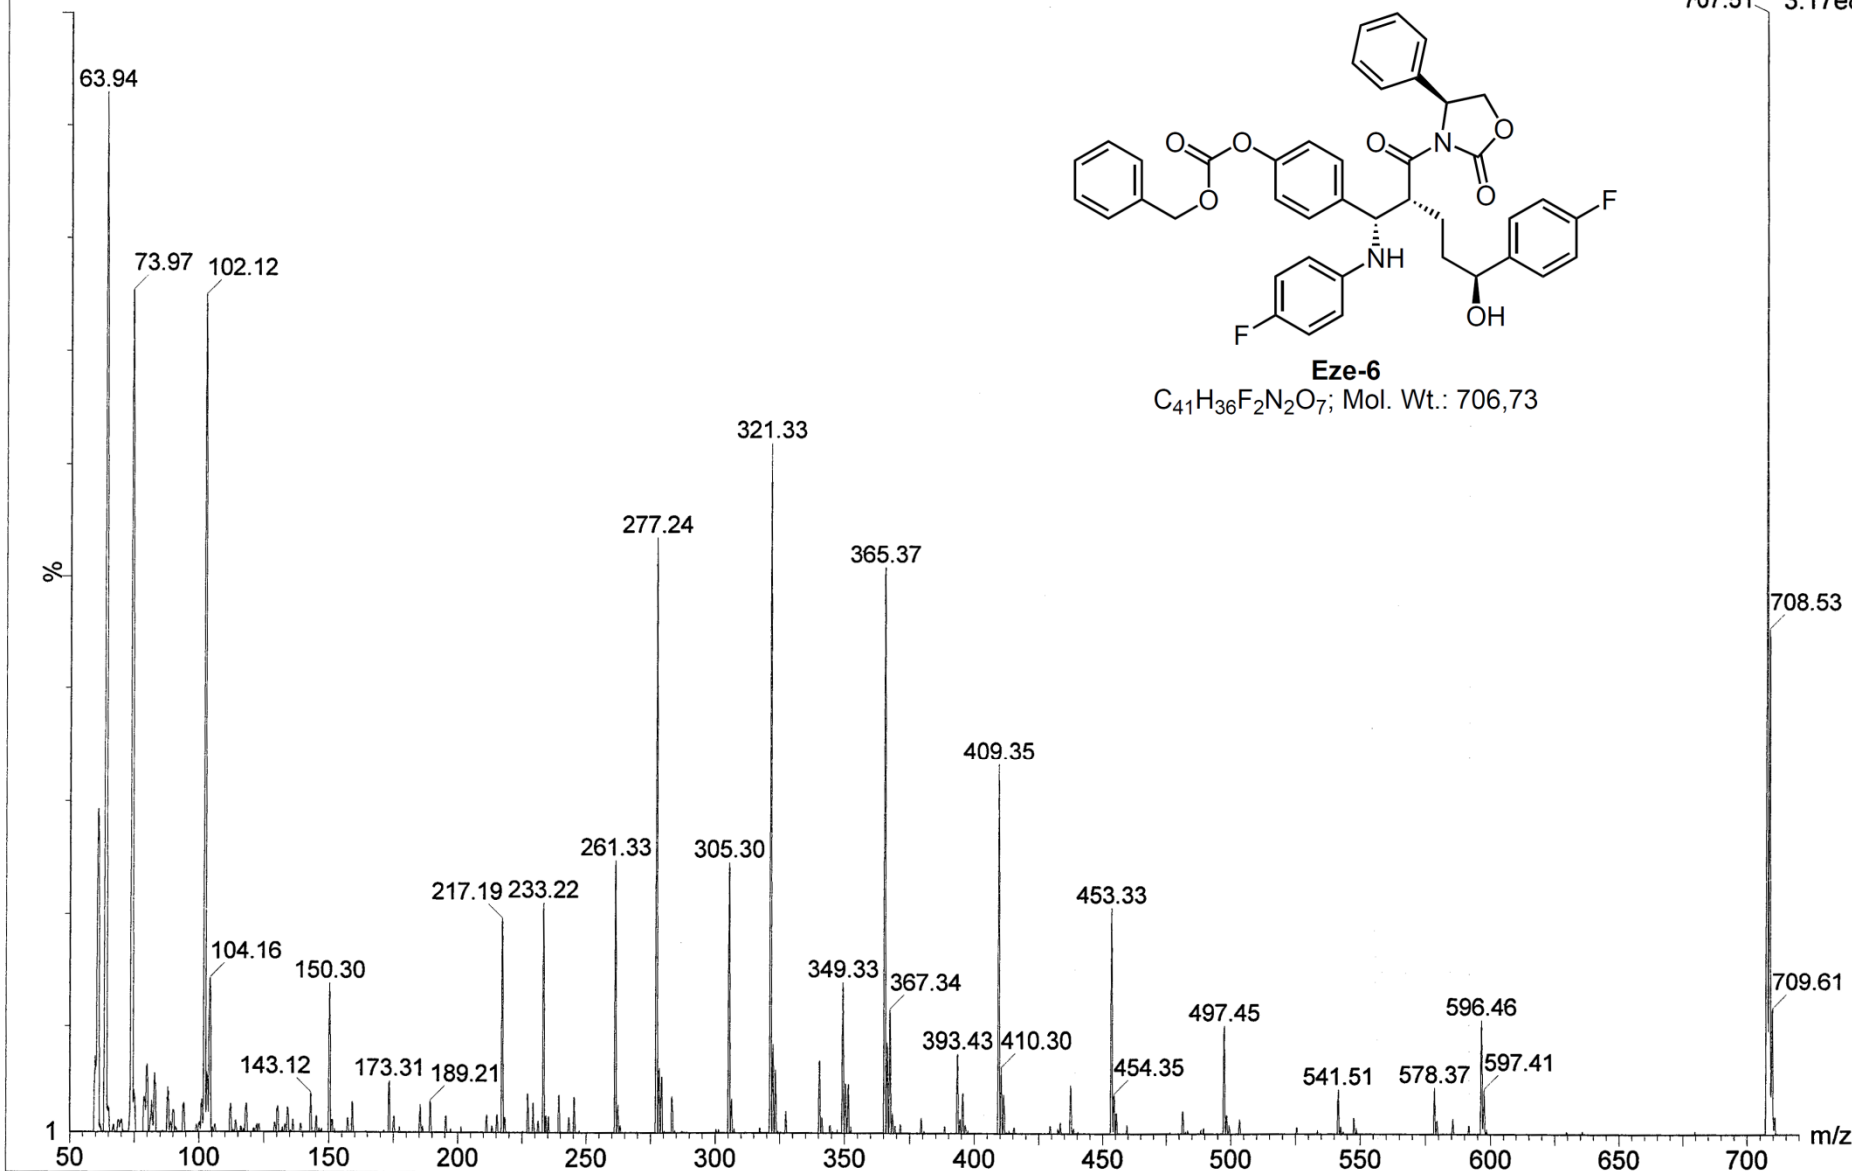

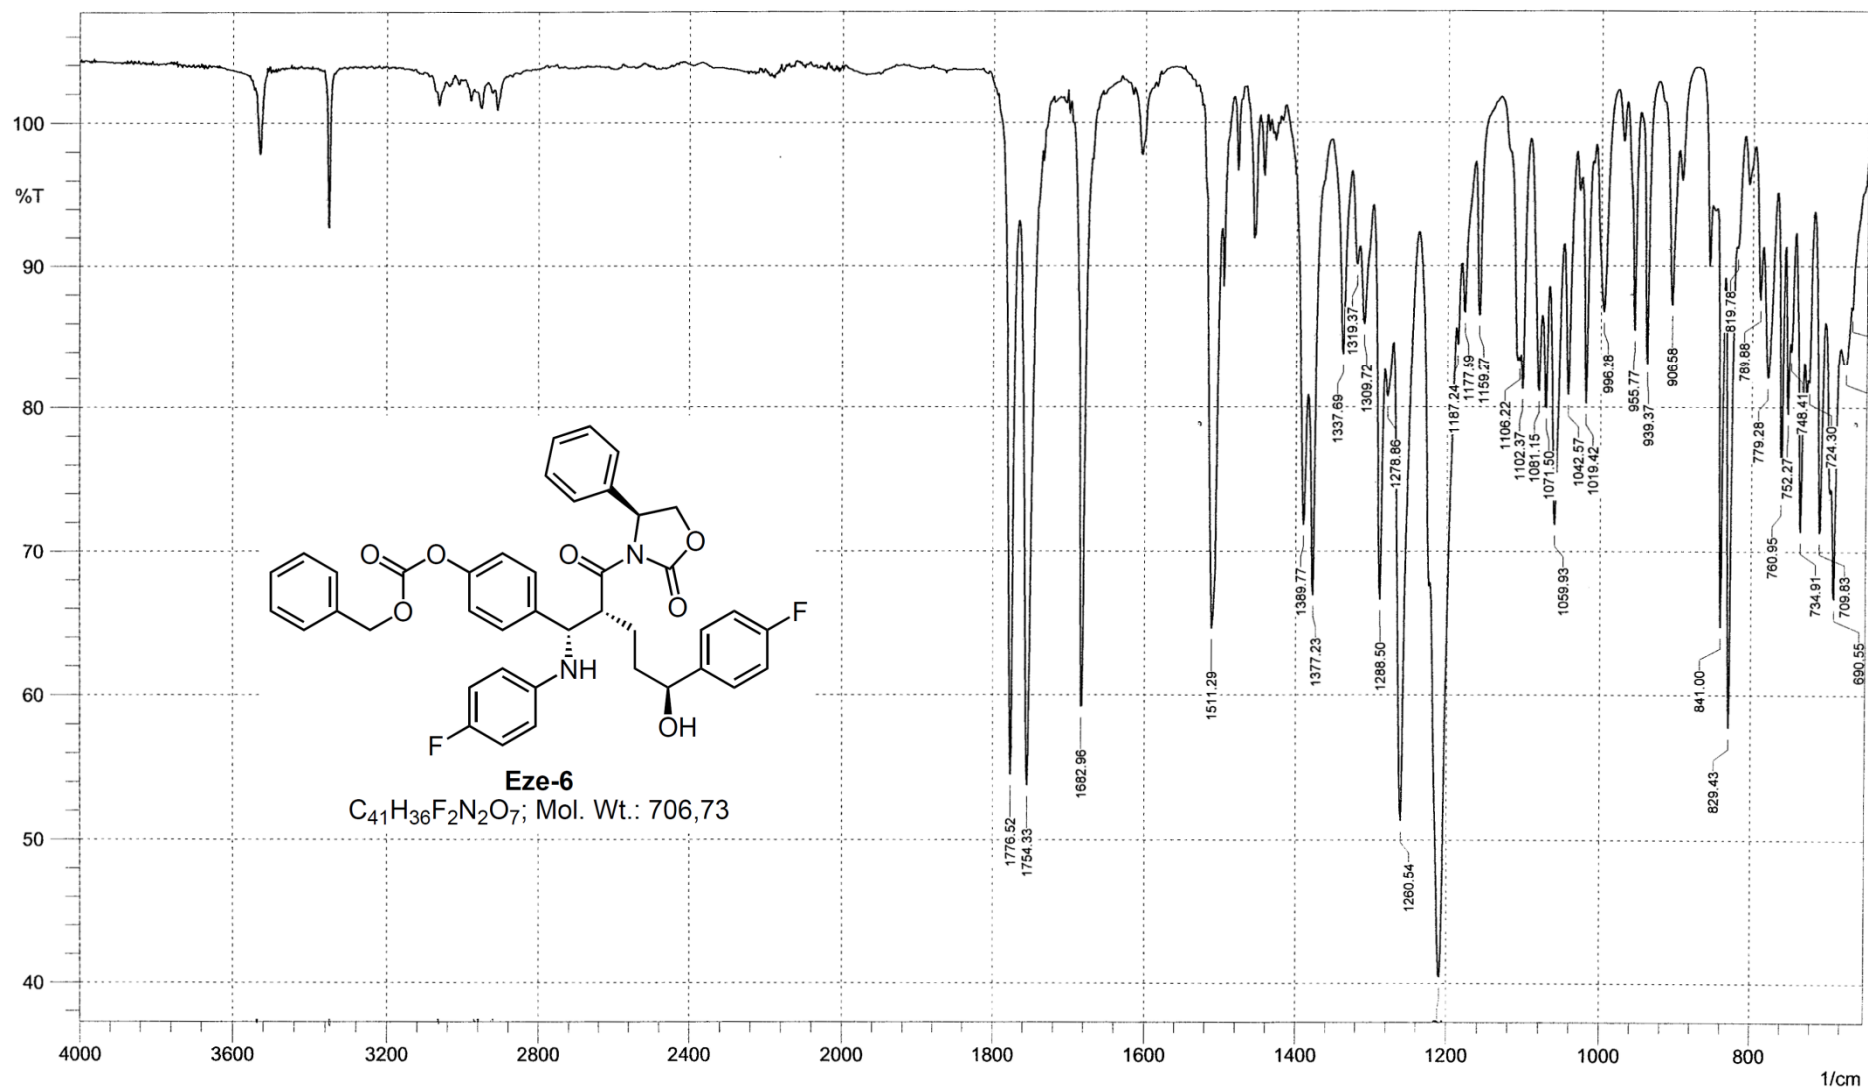



STANDARD 1H OBSERVE

exp5 s2pu1

|                      |                |            |          |
|----------------------|----------------|------------|----------|
| SAMPLE               |                | SPECIAL    |          |
| date                 | Jan 25 2010    | temp       | not used |
| solvent              | CDC13          | gain       | not used |
| file                 | /export/home/~ | spin       | 20       |
| vnmr1/vnmrSYS/data/~ |                | hst        | 0.008    |
| /EB.01.139-CDCL3-H~  |                | pw90       | 14.500   |
|                      | .fid           | alfa       | 20.000   |
| ACQUISITION          |                | FLAGS      |          |
| sw                   | 4798.5         | il         | n        |
| at                   | 1.998          | in         | n        |
| np                   | 19174          | dp         | y        |
| fb                   | 2600           | hs         | nn       |
| bs                   | 16             | PROCESSING |          |
| d1                   | 1.000          | fn         | not used |
| nt                   | 1200           | DISPLAY    |          |
| ct                   | 1200           | sp         | -599.4   |
| TRANSMITTER          |                | wp         | 4798.2   |
| tn                   | H1             | rfl        | 599.7    |
| sfrq                 | 299.926        | rfp        | 0        |
| tof                  | 255.9          | rp         | 65.6     |
| tpwr                 | 56             | lp         | -74.4    |
| pw                   | 7.250          | PLOT       |          |
| DECOUPLER            |                | wc         | 250      |
| dn                   | C13            | sc         | 0        |
| dof                  | 0              | vs         | 184      |
| dm                   | nnn            | th         | 173      |
| dmm                  | c              | ai         | cdc ph   |
| dpwr                 | 41             |            |          |
| dmf                  | 13100          |            |          |

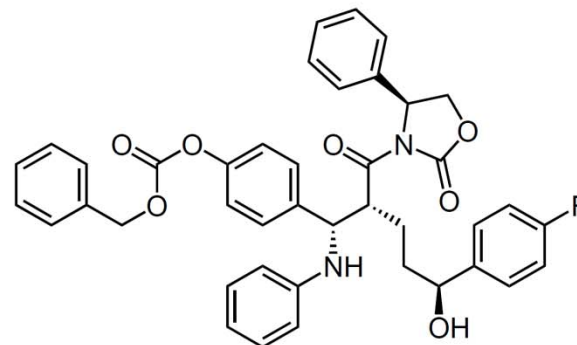

**desfluoro Eze-6**  
 $C_{41}H_{37}FN_2O_7$ ; Mol. Wt.: 688,74

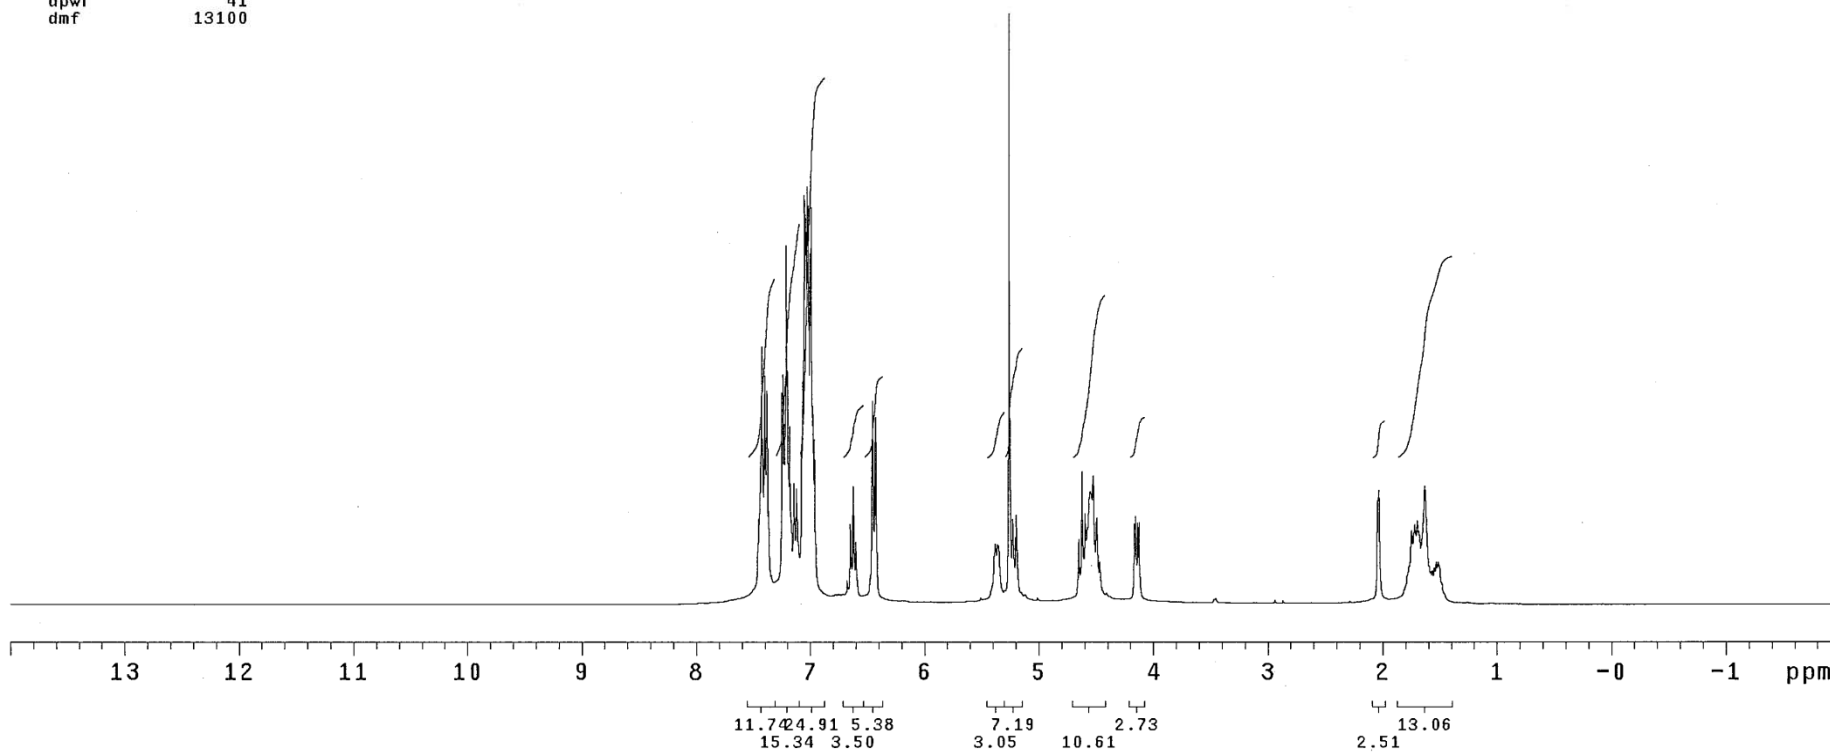

13C OBSERVE

exp5 s2pu1

| SAMPLE              |                | SPECIAL |          |
|---------------------|----------------|---------|----------|
| date                | Jan 25 2010    | temp    | not used |
| solvent             | CDC13          | gain    | not used |
| file                | /export/home/~ | spin    | 20       |
| vnmr1/vnmrsys/data~ |                | hst     | 0.008    |
| /EB.01.139-CDCL3-C~ |                | pw90    | 14.200   |
| .fid                | alfa           |         | 20.000   |

  

| ACQUISITION |         | FLAGS |    |
|-------------|---------|-------|----|
| sw          | 18867.9 | i1    | n  |
| at          | 1.815   | in    | n  |
| np          | 68492   | dp    | y  |
| fb          | 10400   | hs    | nn |
| bs          | 64      |       |    |

  

| PROCESSING |       |
|------------|-------|
| d1         | 1.000 |
| nt         | 30000 |
| ct         | 30000 |

  

| TRANSMITTER |        | DISPLAY |         |
|-------------|--------|---------|---------|
| tn          | C13    | sp      | -1032.0 |
| sfrq        | 75.424 | wp      | 18761.7 |
| tof         | 725.6  | rfl     | 1138.2  |
| tpwr        | 56     | rfp     | 0       |
| pw          | 7.100  | rp      | -57.8   |
|             |        | lp      | -249.9  |

  

| DECOUPLER |      | PLOT |     |
|-----------|------|------|-----|
| dn        | H1   | wc   | 250 |
| dof       | 0    | sc   | 0   |
| dm        | yyy  | vs   | 853 |
| dmm       | w    | th   | 147 |
| dpwr      | 36   | ai   | no  |
| dmf       | 6500 | ph   |     |

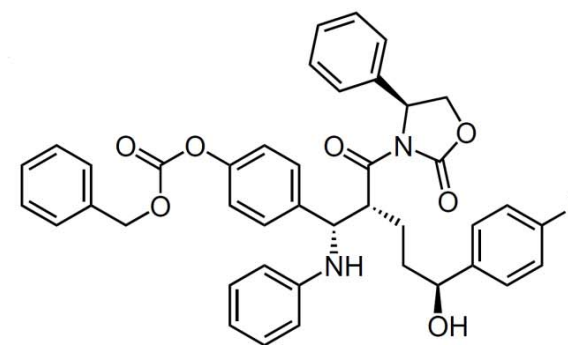

**desfluoro Eze-6**  
C<sub>41</sub>H<sub>37</sub>FN<sub>2</sub>O<sub>7</sub>; Mol. Wt.: 688,74

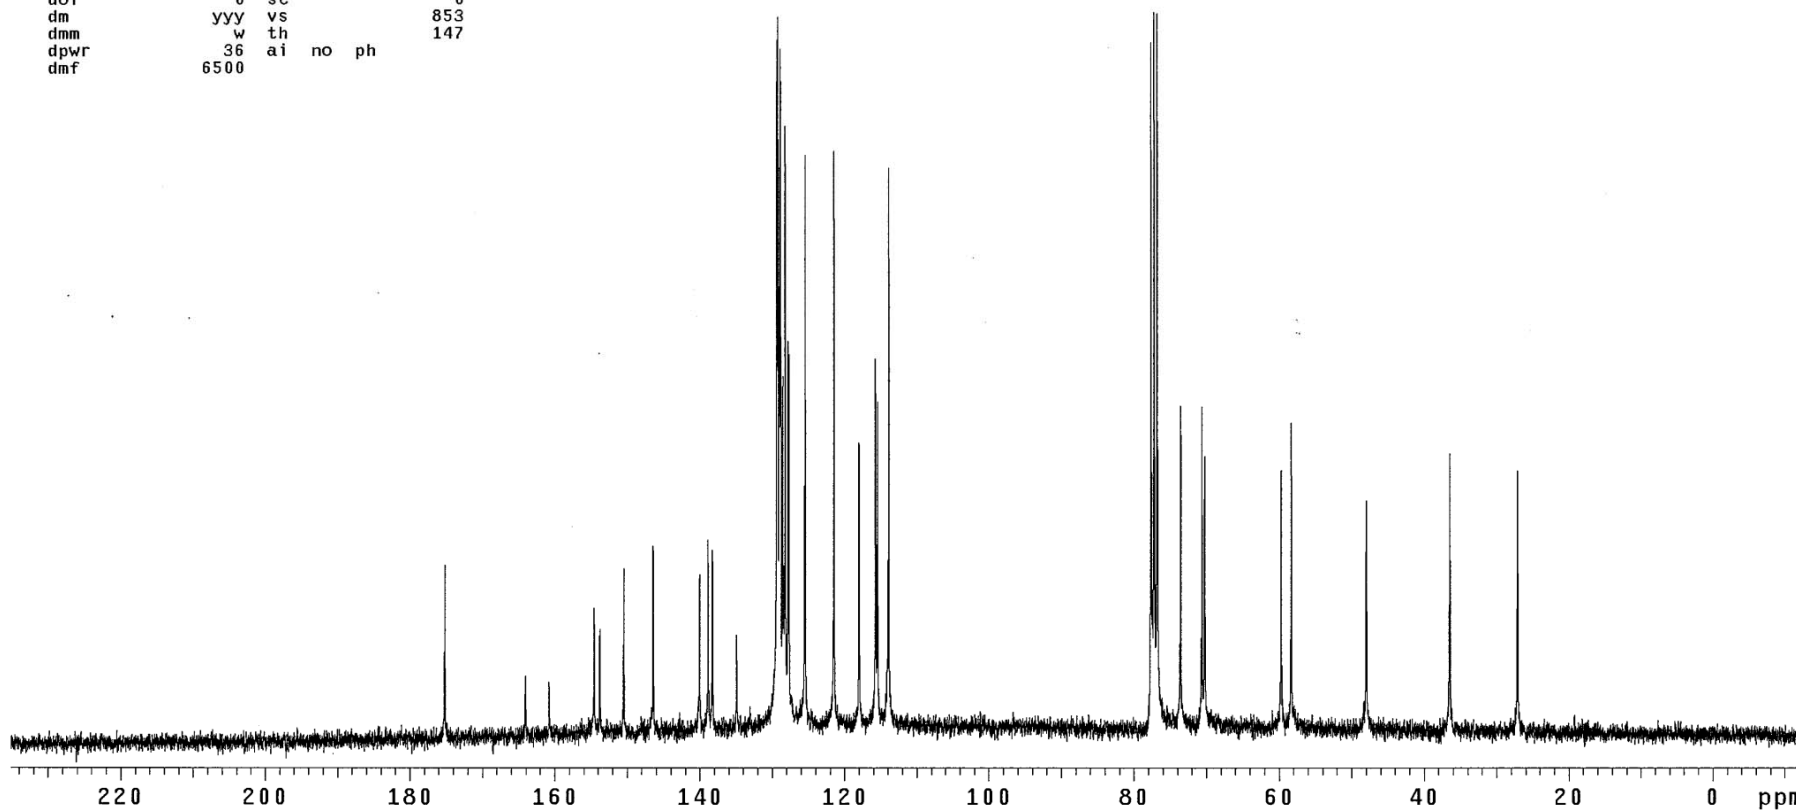

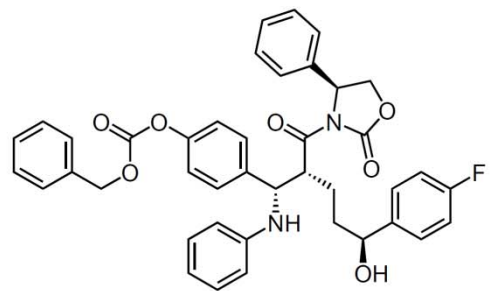

**desfluoro Eze-6**

$C_{41}H_{37}FN_2O_7$ ; Mol. Wt.: 688,74

CH3 carbons

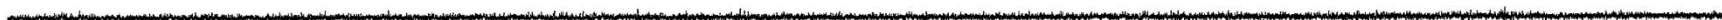

CH2 carbons

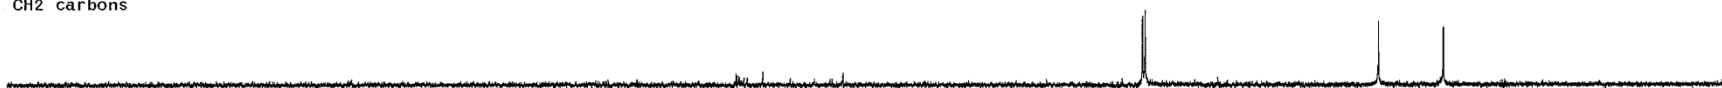

CH carbons

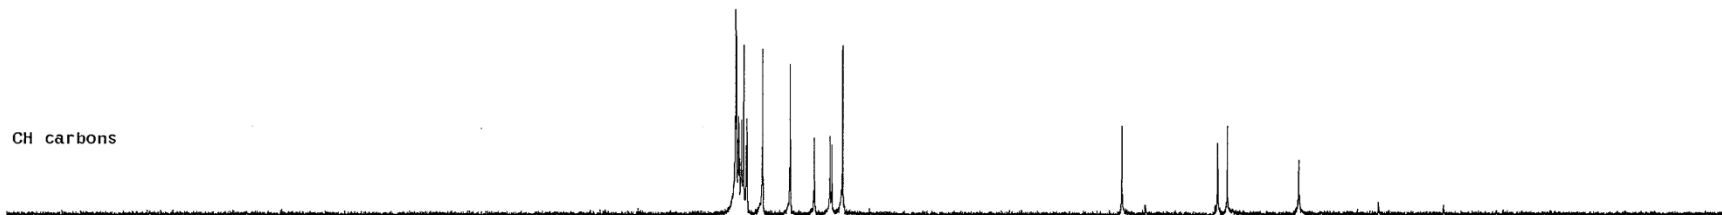

all protonated carbons

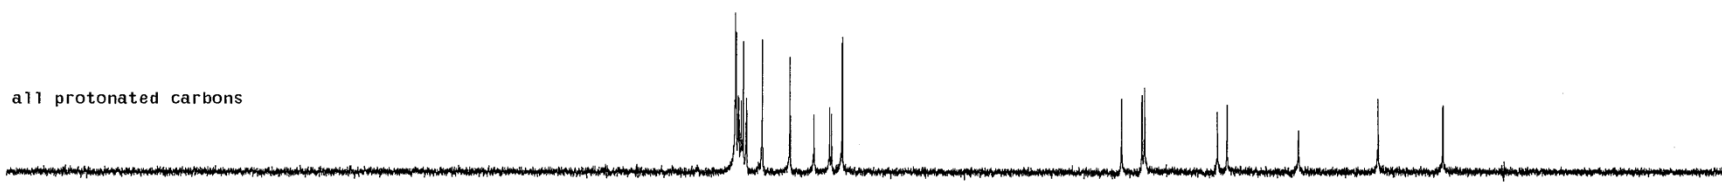

220 200 180 160 140 120 100 80 60 40 20 0 ppm

EB01139

EB01139++ 1 (1.019)

Scan ES+  
689.52 5.48e8

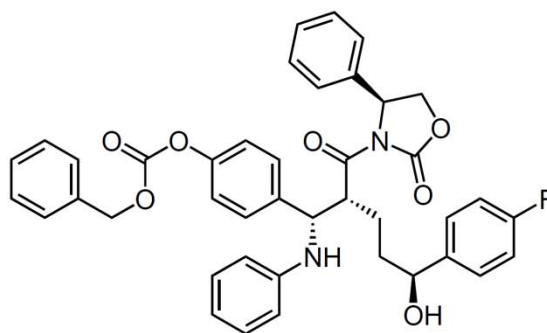

desfluoro Eze-6

C<sub>41</sub>H<sub>37</sub>FN<sub>2</sub>O<sub>7</sub>; Mol. Wt.: 688,74

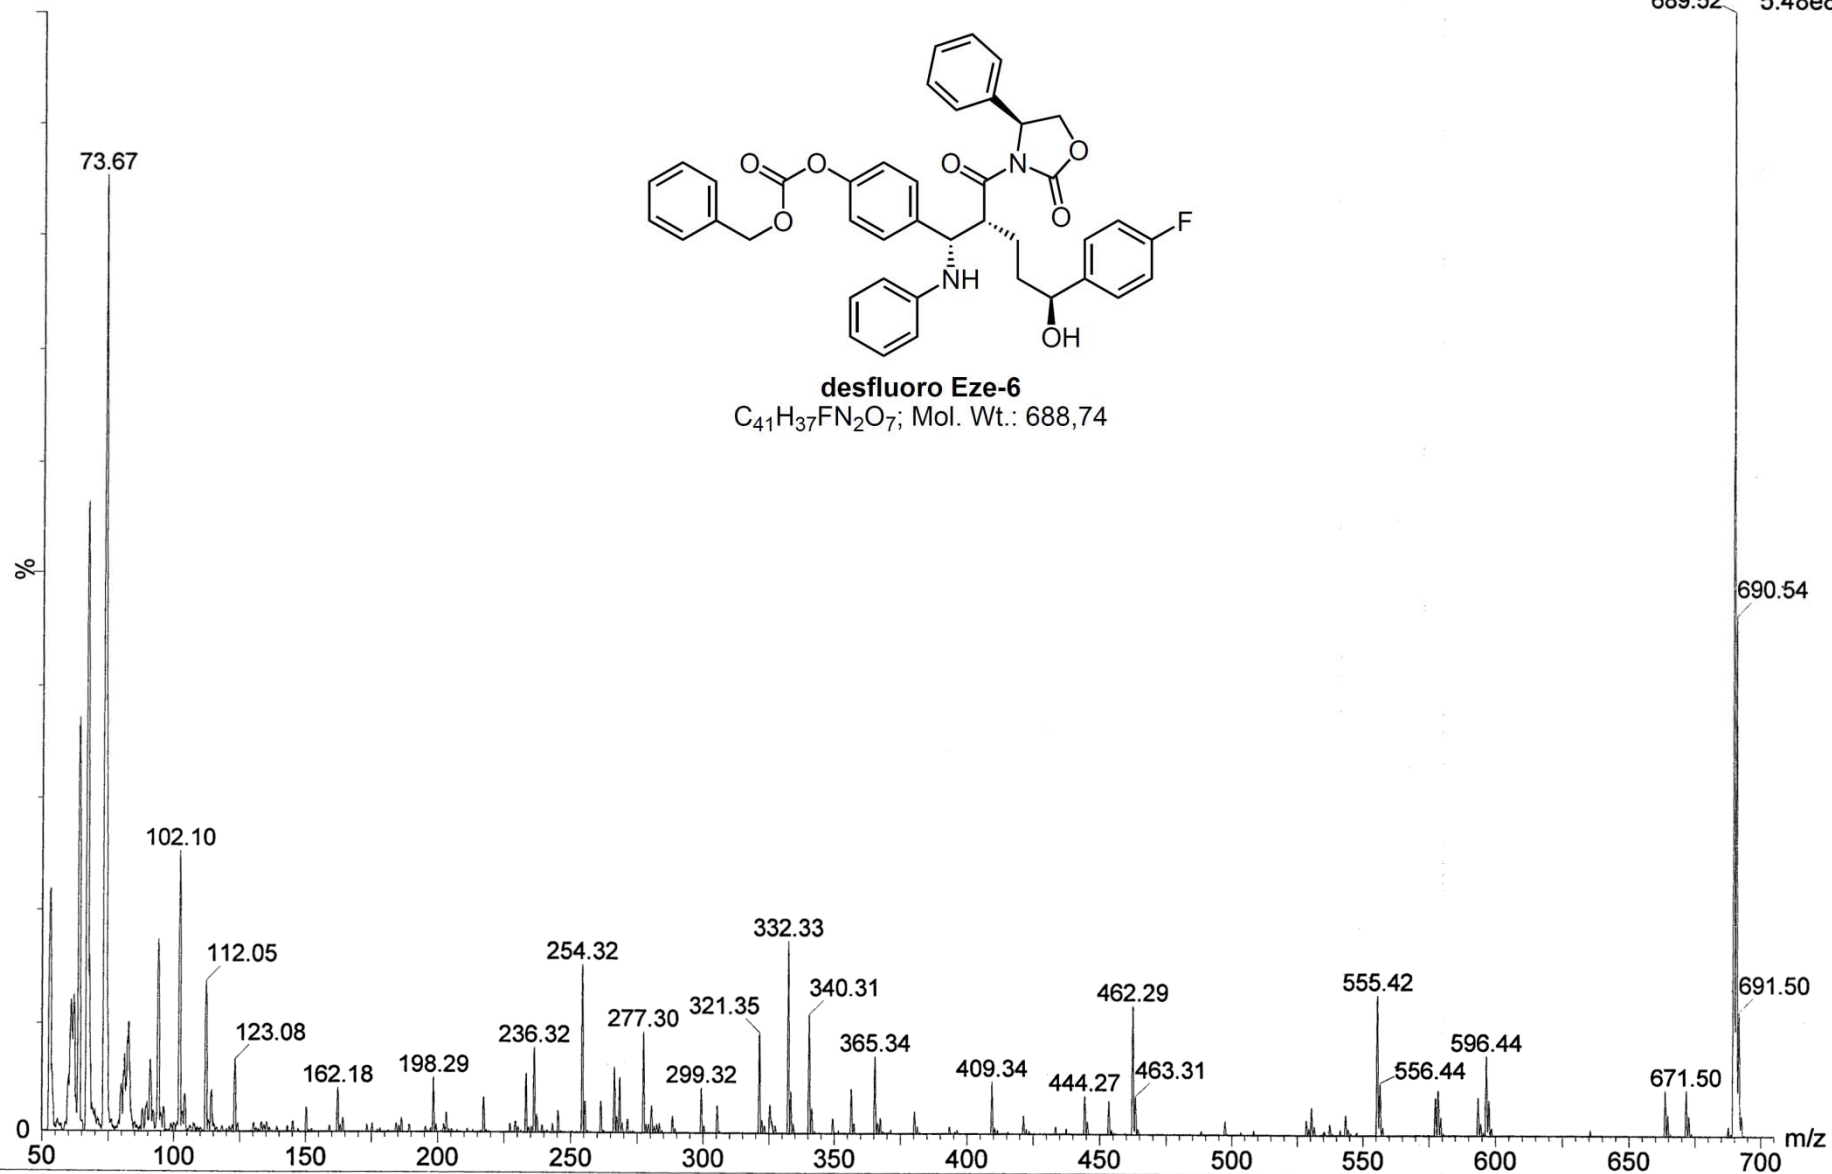

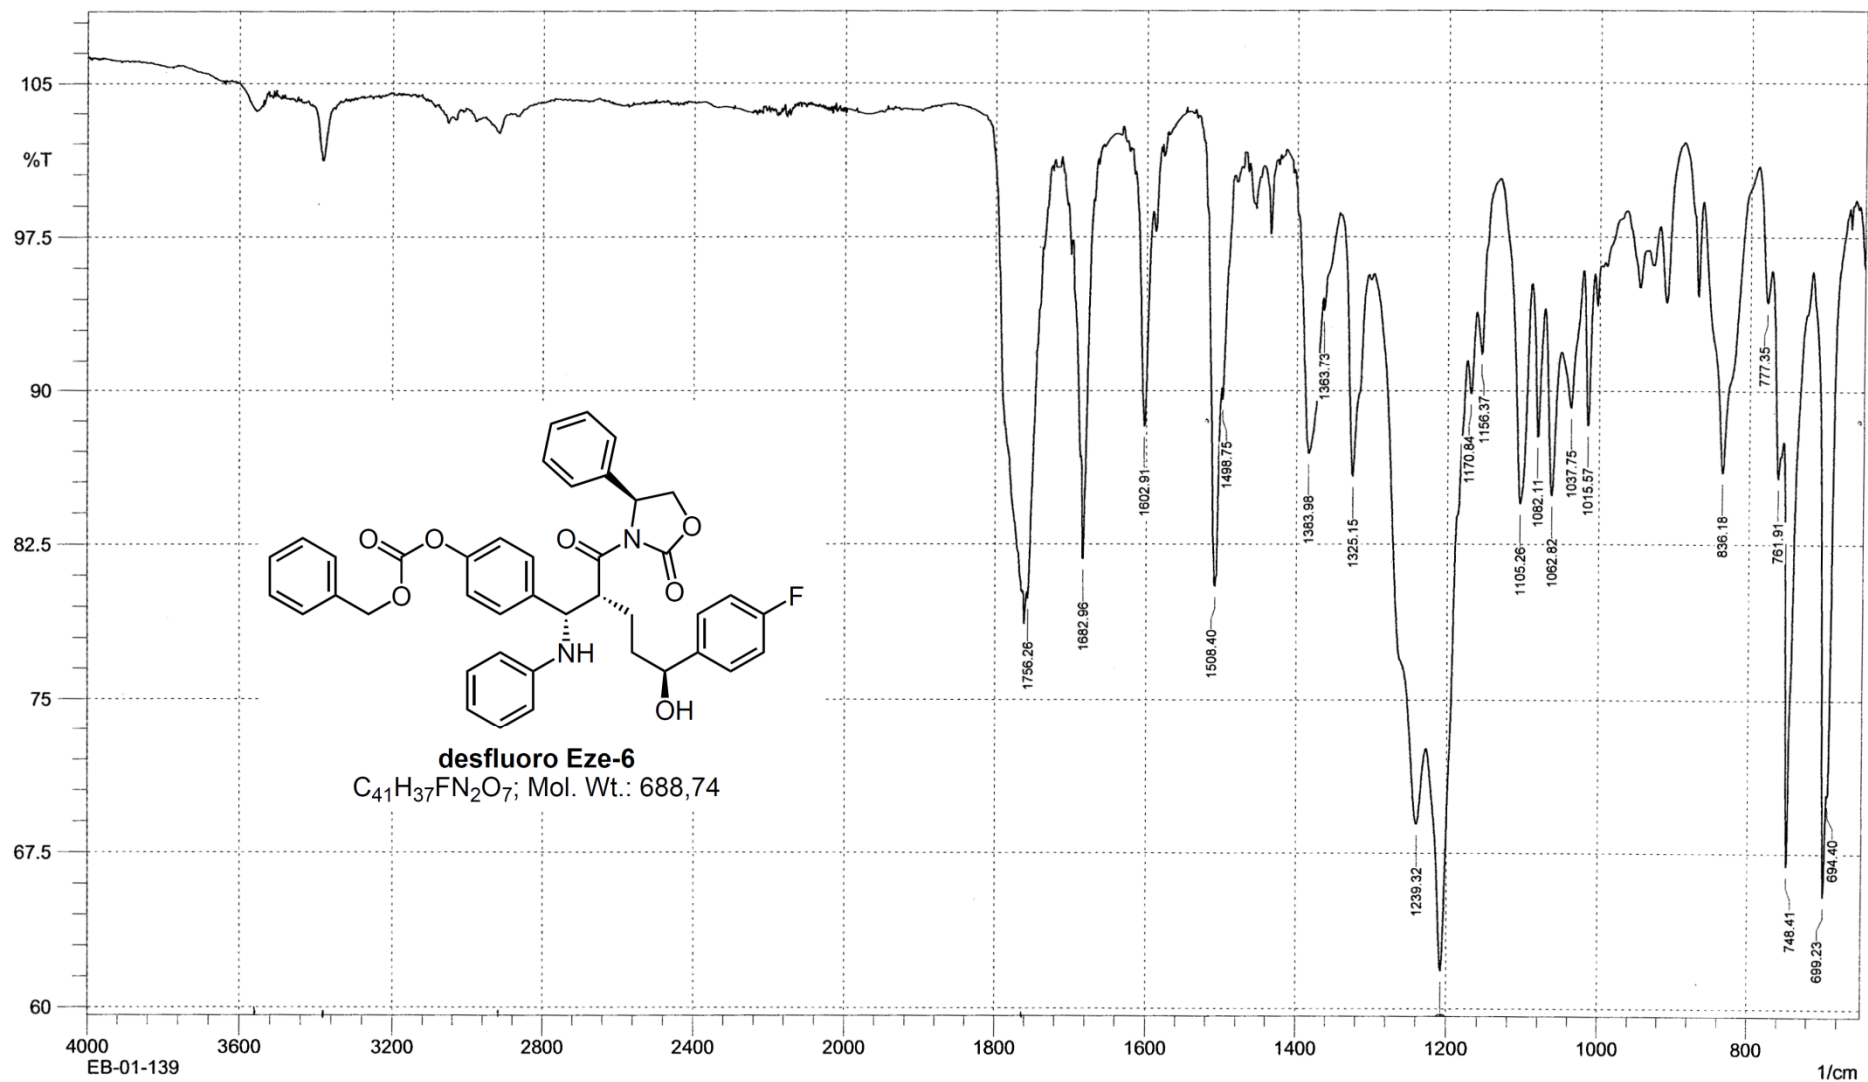

STANDARD 1H OBSERVE

exp9 s2pu1

|                     |                |            |          |
|---------------------|----------------|------------|----------|
| SAMPLE              |                | SPECIAL    |          |
| date                | Apr 6 2009     | temp       | not used |
| solvent             | CDC13          | gain       | not used |
| file                | /export/home/~ | spin       | 20       |
| vnmr1/vnmrsys/data~ |                | hst        | 0.008    |
| /EB.01.121-EZE24-C~ |                | pw90       | 14.500   |
| DCL3-H.fid          |                | alfa       | 20.000   |
| ACQUISITION         |                | FLAGS      |          |
| sw                  | 4798.5         | il         | n        |
| at                  | 1.998          | in         | n        |
| np                  | 19174          | dp         | y        |
| fb                  | 2600           | hs         | nn       |
| bs                  | 16             | PROCESSING |          |
| d1                  | 1.000          | fn         | not used |
| nt                  | 1200           | DISPLAY    |          |
| ct                  | 1200           | sp         | -583.7   |
| TRANSMITTER         |                | wp         | 4798.2   |
| tn                  | H1             | rfl        | 584.0    |
| sfrq                | 299.926        | rpf        | 0        |
| tof                 | 255.9          | rp         | 60.5     |
| tpwr                | 56             | lp         | -51.8    |
| pw                  | 7.250          | PLOT       |          |
| DECOUPLER           |                | wc         | 250      |
| dn                  | C13            | sc         | 0        |
| dof                 | 0              | vs         | 139      |
| dm                  | nnn            | th         | 178      |
| dmm                 | c              | ai         | cdc ph   |
| dpwr                | 41             |            |          |
| dmf                 | 13100          |            |          |

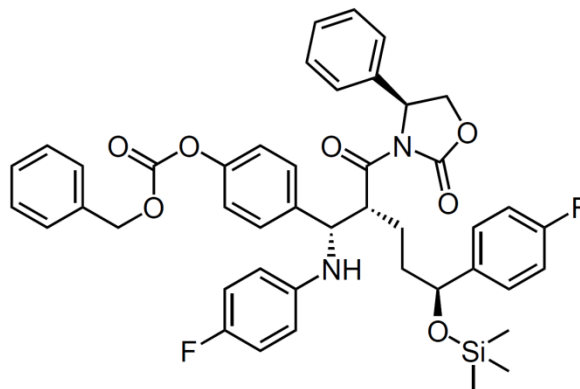

**Eze-7**  
 $C_{44}H_{44}F_2N_2O_7Si$ ; Mol. Wt.: 778,91

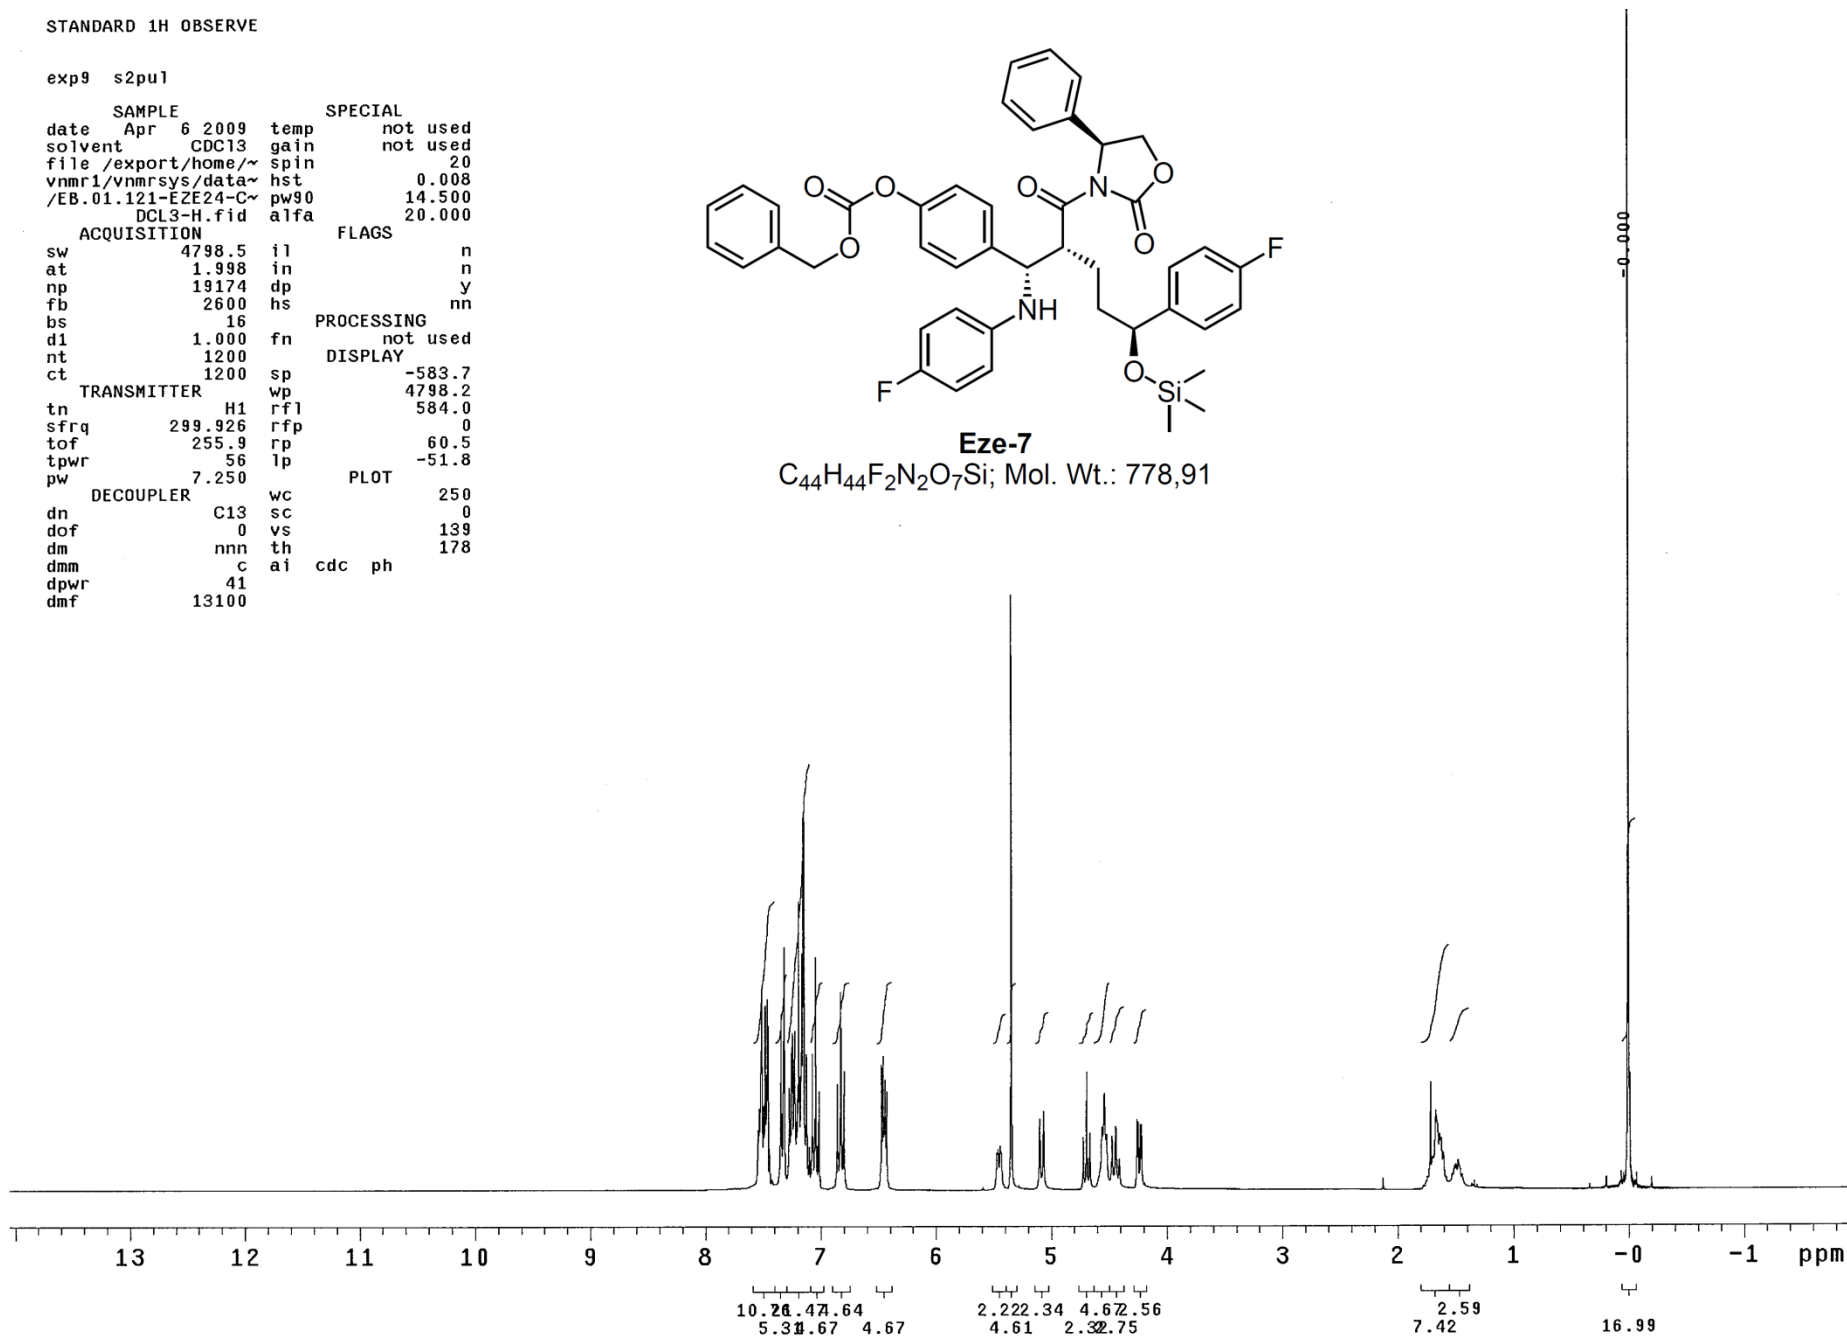

13C OBSERVE

exp9 s2pu1

| SAMPLE              |                | SPECIAL |          |
|---------------------|----------------|---------|----------|
| date                | Apr 6 2009     | temp    | not used |
| solvent             | CDC13          | gain    | not used |
| file                | /export/home/~ | spin    | 20       |
| vmr1/vmrsys/data~   | hst            |         | 0.008    |
| /EB.01.121-EZE24-C~ | pw90           |         | 14.200   |
| DCL3-C.fid          | alfa           |         | 20.000   |

  

| ACQUISITION |         | FLAGS |    |
|-------------|---------|-------|----|
| sw          | 18867.9 | il    | n  |
| at          | 1.815   | in    | n  |
| np          | 68492   | dp    | y  |
| fb          | 10400   | hs    | nn |
| bs          | 64      |       |    |

  

| PROCESSING |       |
|------------|-------|
| d1         | 1.000 |
| nt         | 50000 |
| ct         | 20096 |

  

| TRANSMITTER |        | DISPLAY |         |
|-------------|--------|---------|---------|
| tn          | C13    | sp      | -1155.3 |
| sfrq        | 75.424 | wp      | 18867.6 |
| tof         | 725.6  | rf1     | 1155.6  |
| tpwr        | 56     | rpf     | 0       |
| pw          | 7.100  | rp      | -35.9   |
|             |        | lp      | -251.4  |

  

| DECOUPLER |      | PLOT |     |
|-----------|------|------|-----|
| dn        | H1   | wc   | 250 |
| dof       | 0    | sc   | 0   |
| dm        | yyy  | vs   | 126 |
| dmm       | w    | th   | 179 |
| dpwr      | 36   | ai   | no  |
| dmf       | 6500 | ph   |     |

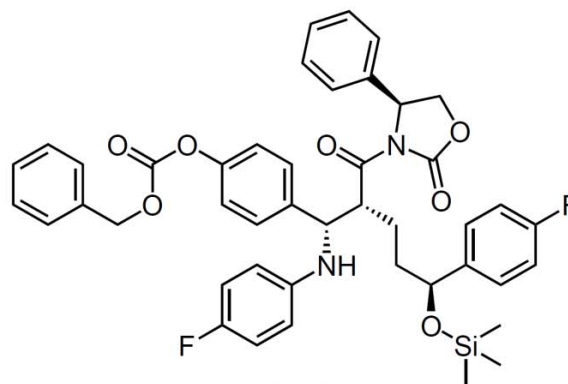

**Eze-7**  
C<sub>44</sub>H<sub>44</sub>F<sub>2</sub>N<sub>2</sub>O<sub>7</sub>Si; Mol. Wt.: 778,91

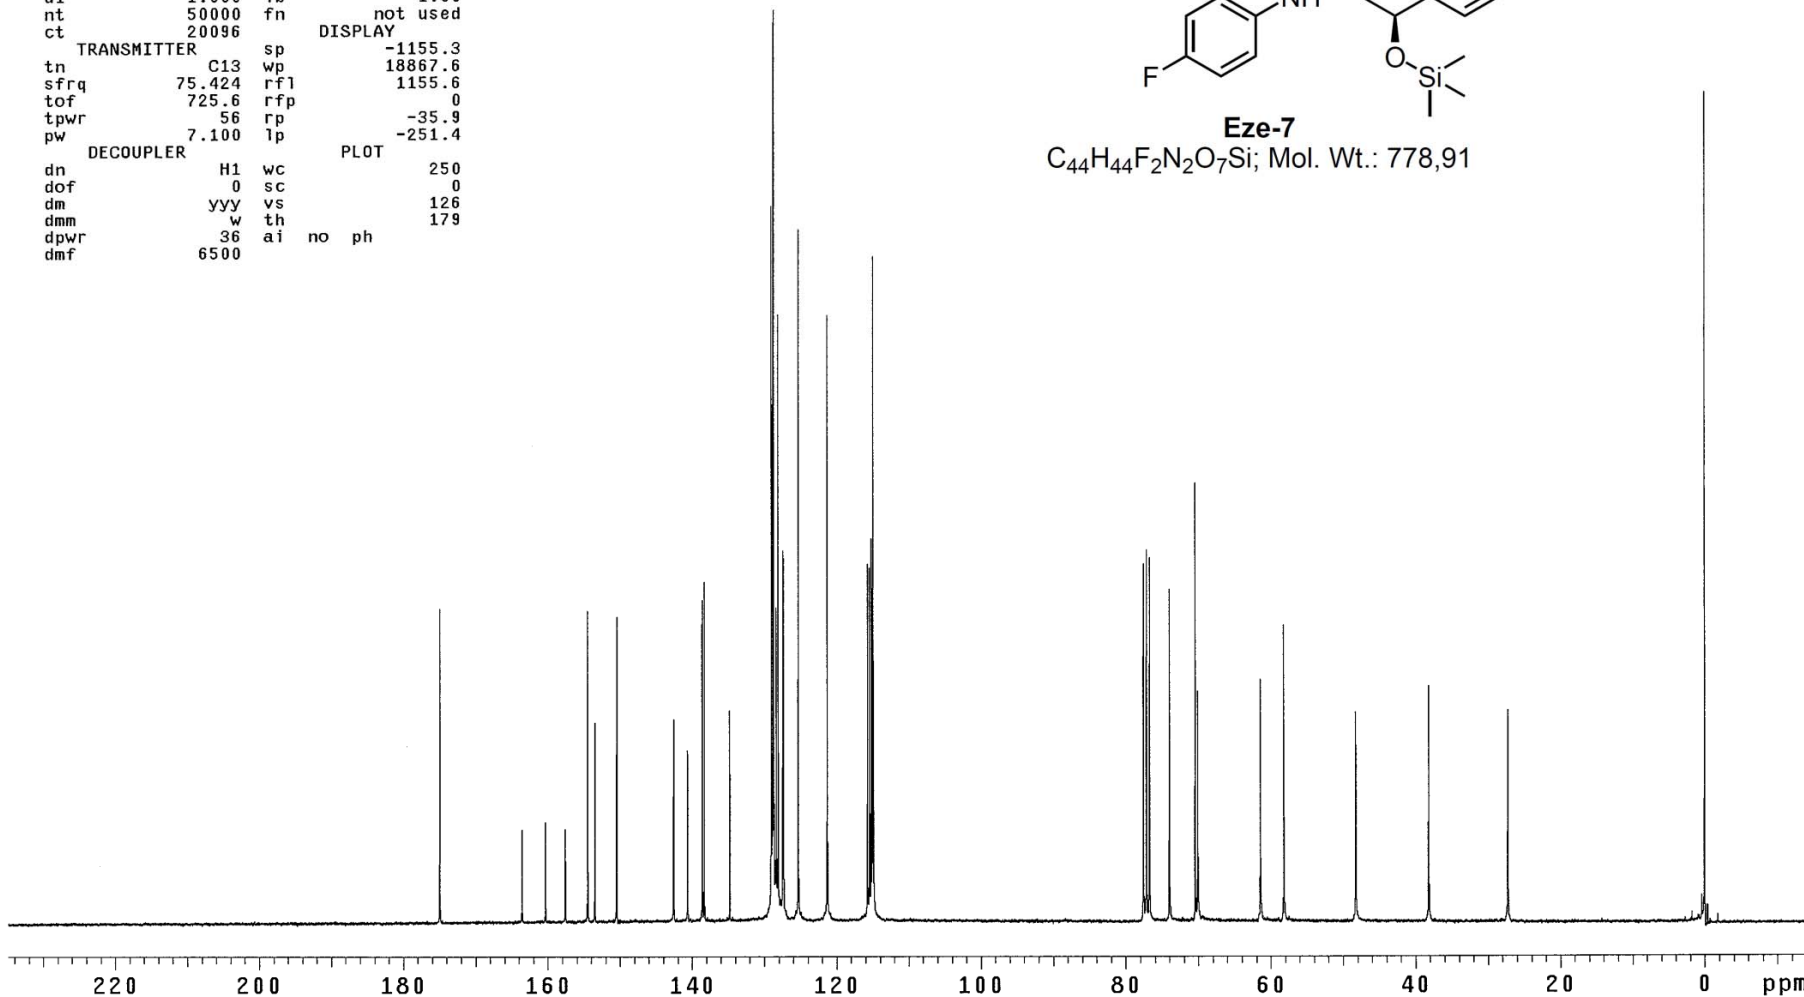

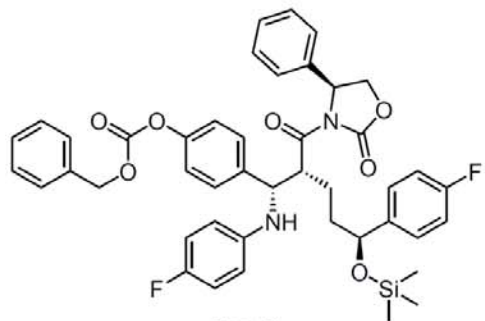

**Eze-7**

$C_{44}H_{44}F_2N_2O_7Si$ ; Mol. Wt.: 778,91

CH3 carbons

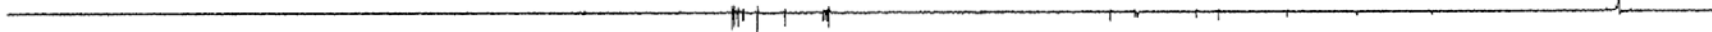

CH2 carbons

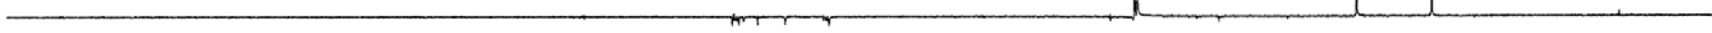

CH carbons

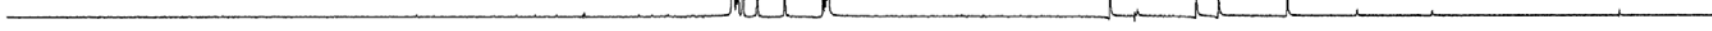

all protonated carbons

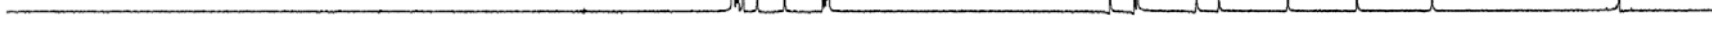

220 200 180 160 140 120 100 80 60 40 20 0 ppm



EZE

EZE: + 1 (1.019)

Scan ES+  
3.07e8

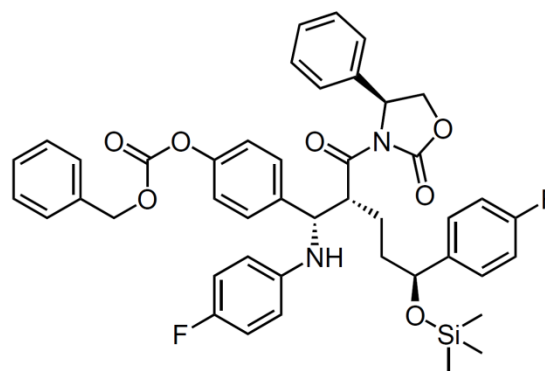

**Eze-7**

C<sub>44</sub>H<sub>44</sub>F<sub>2</sub>N<sub>2</sub>O<sub>7</sub>Si; Mol. Wt.: 778,91

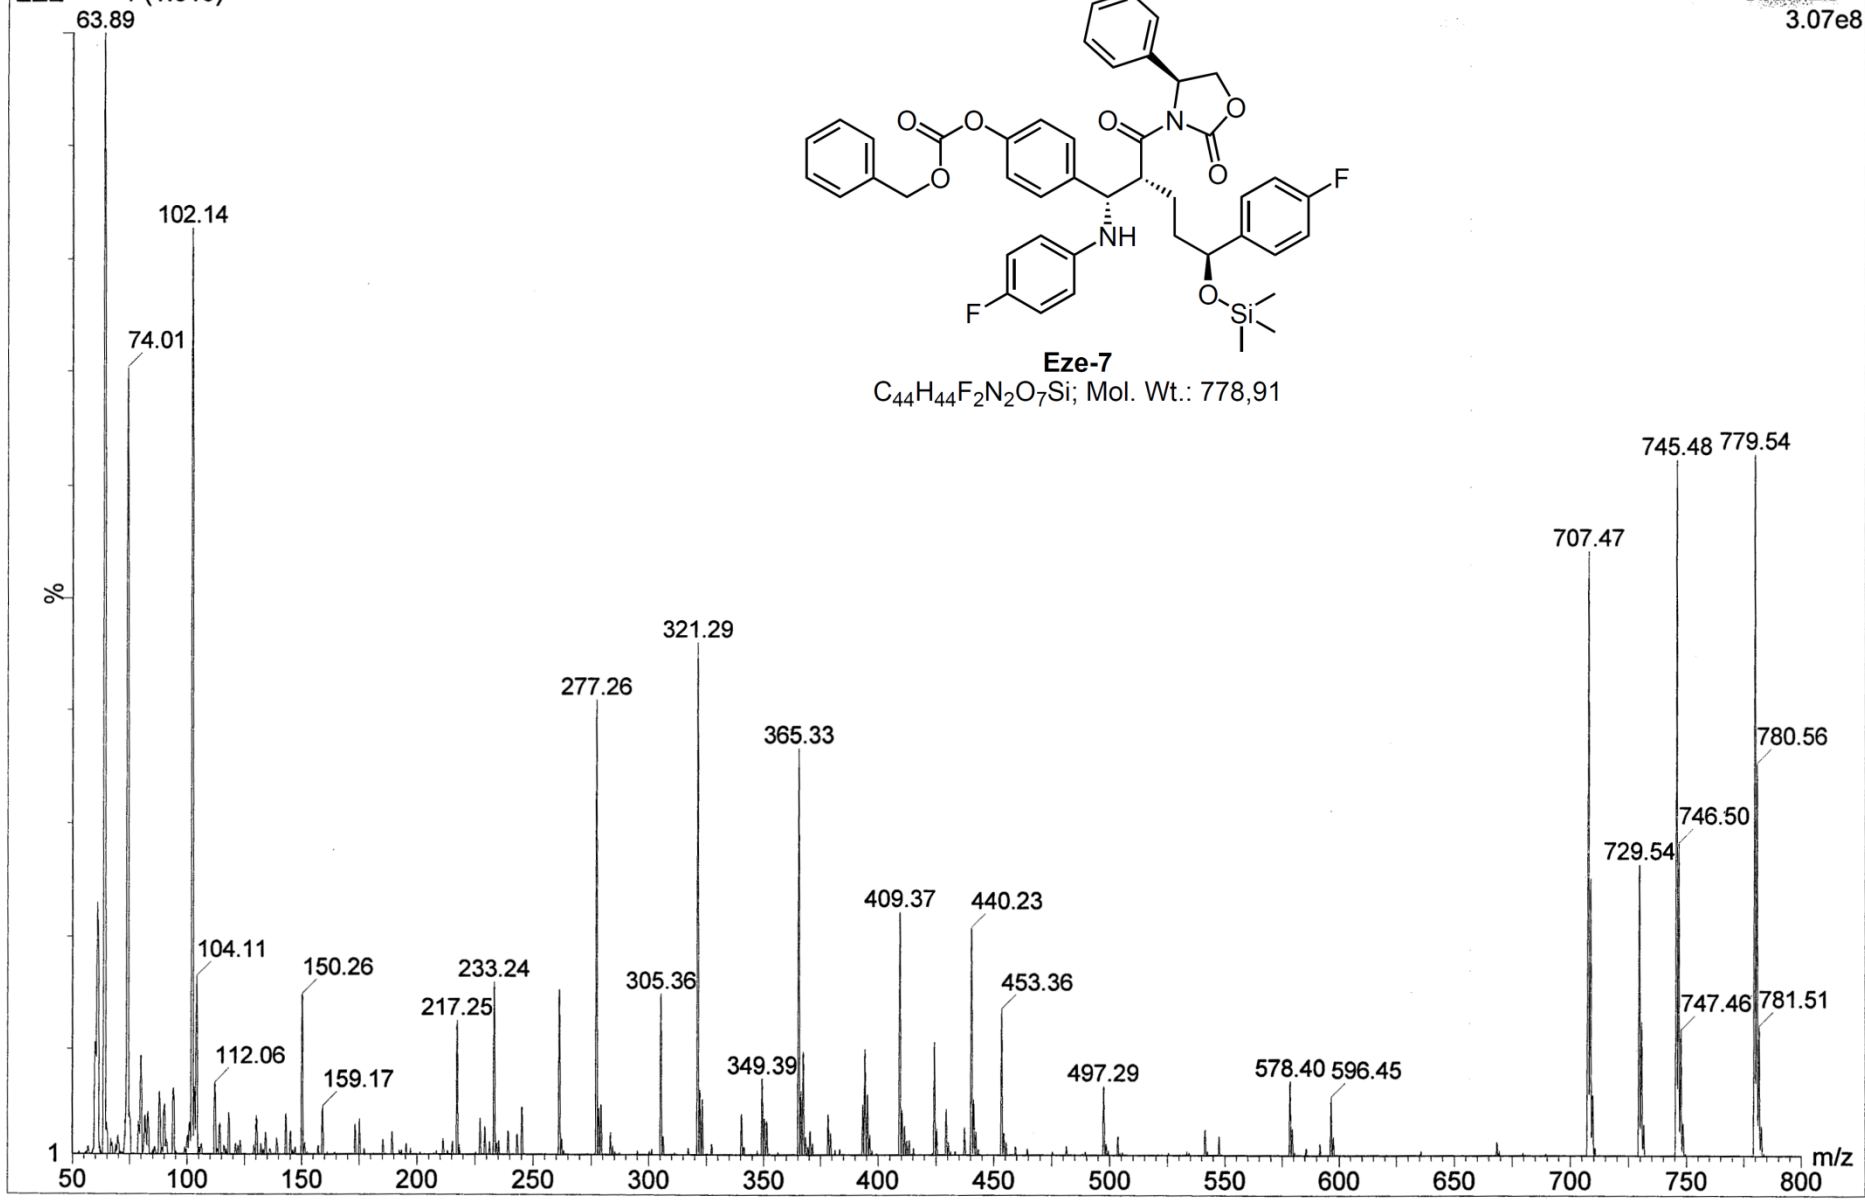

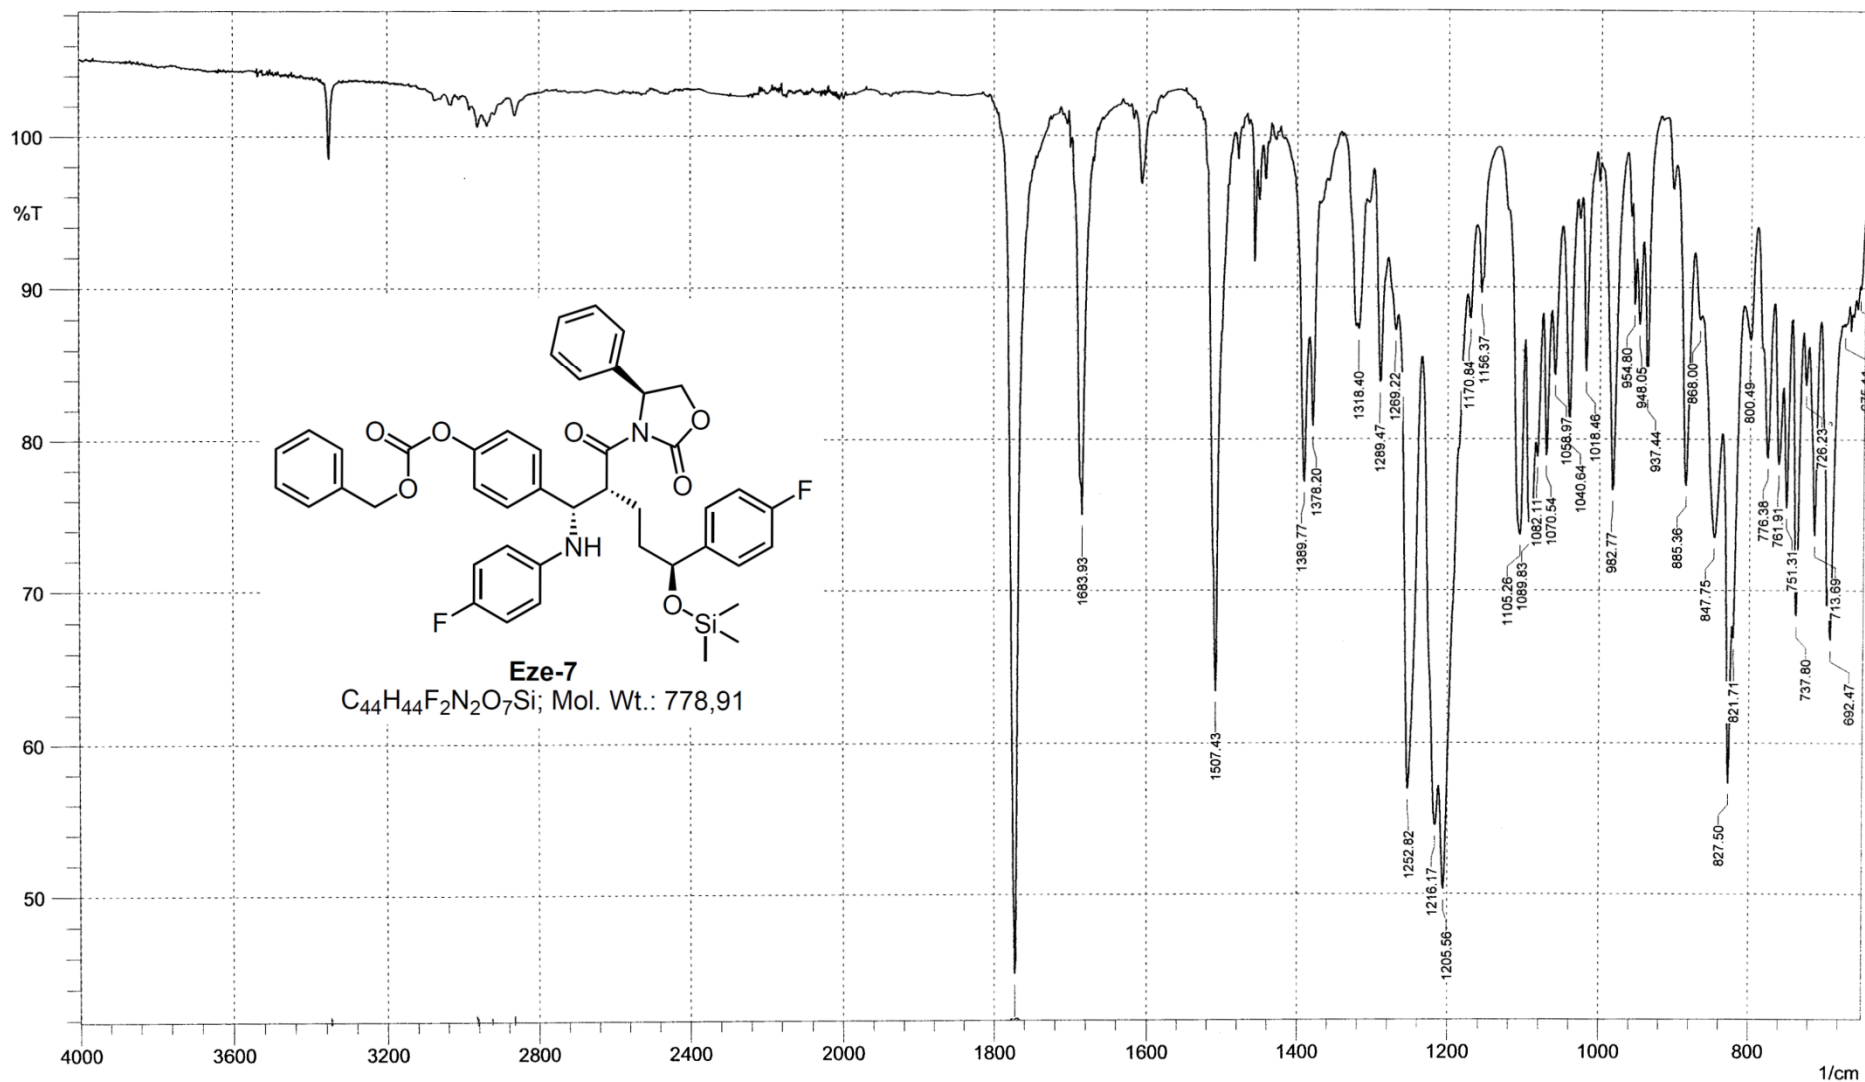

STANDARD 1H OBSERVE

exp5 s2pu1

|                     |                |            |          |
|---------------------|----------------|------------|----------|
| SAMPLE              |                | SPECIAL    |          |
| date                | Jan 27 2010    | temp       | not used |
| solvent             | CDCl3          | gain       | not used |
| file                | /export/home/~ | spin       | 20       |
| vnmr1/vnmrsys/data~ | hst            | 0.008      |          |
| /EB.01.140-CDCL3-H~ | pw90           | 14.500     |          |
|                     | fid            | alfa       | 20.000   |
| ACQUISITION         |                | FLAGS      |          |
| sw                  | 4798.5         | il         | n        |
| at                  | 1.998          | in         | n        |
| np                  | 19174          | dp         | y        |
| fb                  | 2600           | hs         | nn       |
| bs                  | 16             |            |          |
| d1                  | 1.000          | fn         | not used |
| nt                  | 1200           | PROCESSING |          |
| ct                  | 1200           | DISPLAY    |          |
| TRANSMITTER         |                | sp         | -568.2   |
|                     |                | wp         | 4798.2   |
| tn                  | H1             | rfl        | 568.5    |
| sfrq                | 299.926        | rfp        | 0        |
| tof                 | 255.9          | rp         | 63.3     |
| tpwr                | 56             | lp         | -63.1    |
| pw                  | 7.250          | PLOT       |          |
| DECOUPLER           |                | wc         | 250      |
| dn                  | C13            | sc         | 0        |
| dof                 | 0              | vs         | 153      |
| dm                  | nnn            | th         | 179      |
| dmm                 | c              | ai         | cdc ph   |
| dpwr                | 41             |            |          |
| dmf                 | 13100          |            |          |

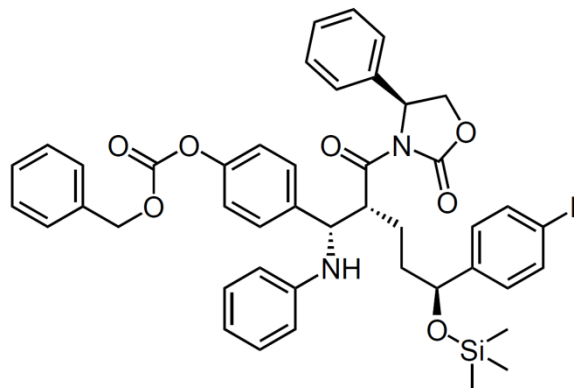

desfluoro Eze-7  
C<sub>44</sub>H<sub>45</sub>FN<sub>2</sub>O<sub>7</sub>Si; Mol. Wt.: 760,92

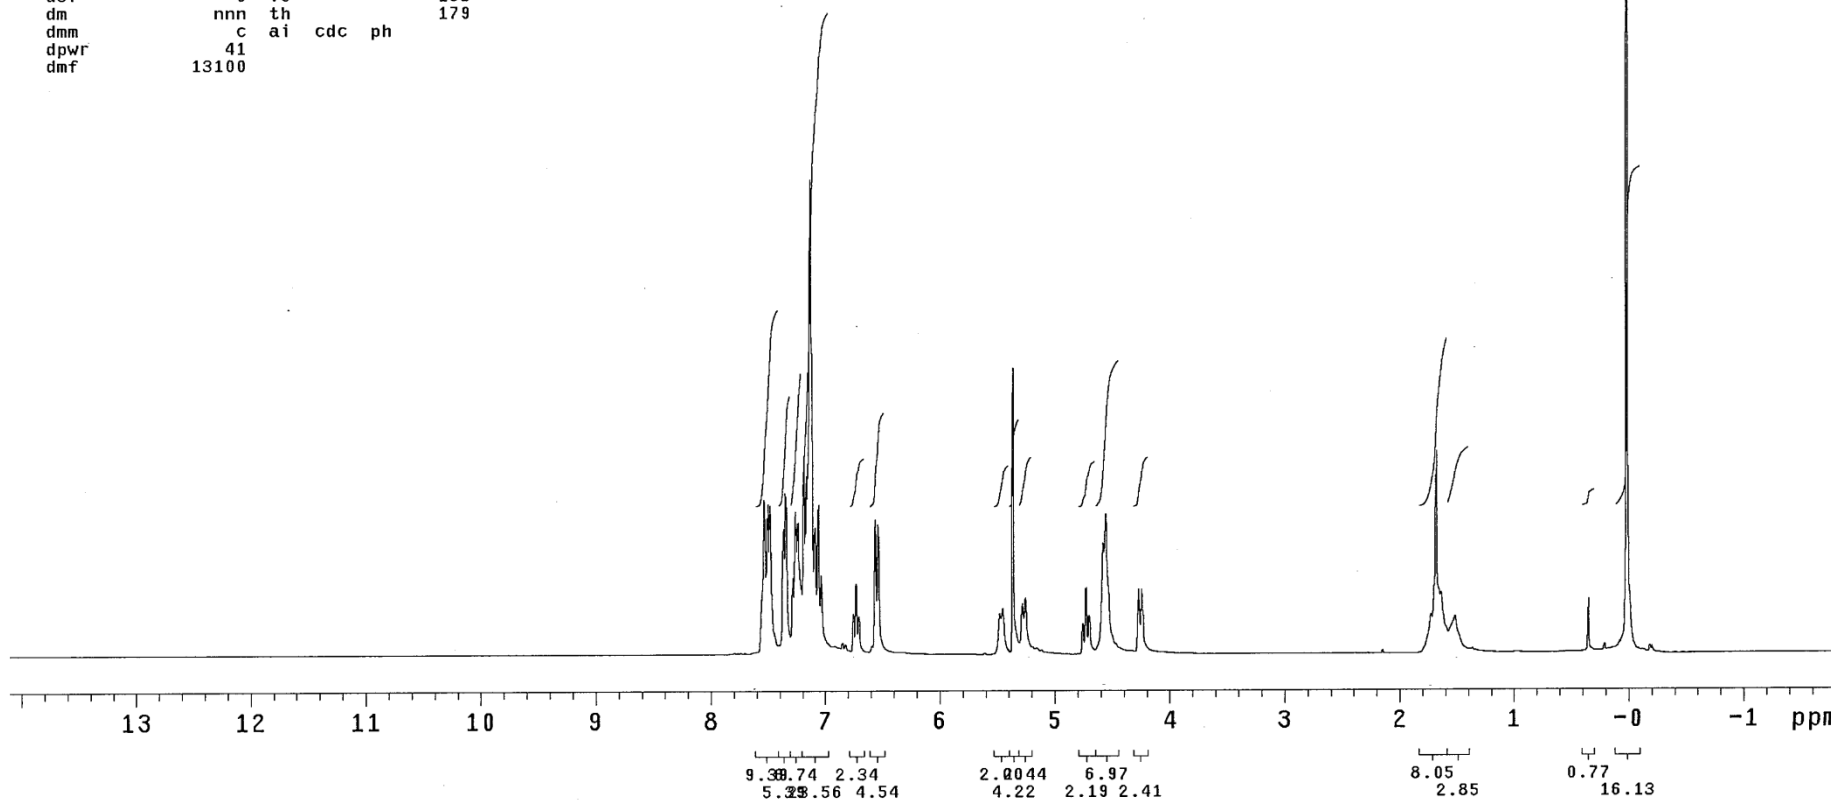

13C OBSERVE

exp5 s2pu1

|                      |                |            |          |
|----------------------|----------------|------------|----------|
| SAMPLE               |                | SPECIAL    |          |
| date                 | Jan 27 2010    | temp       | not used |
| solvent              | CDC13          | gain       | not used |
| file                 | /export/home/~ | spin       | 20       |
| vnmr1/vnmrsys/data/~ | hst            |            | 0.008    |
| /EB.01.140-CDCL3-C~  | pw90           |            | 14.200   |
|                      | fid            | alfa       | 20.000   |
| ACQUISITION          |                | FLAGS      |          |
| sw                   | 18867.9        | il         | n        |
| at                   | 1.815          | in         | n        |
| np                   | 68492          | dp         | y        |
| fb                   | 10400          | hs         | nn       |
| bs                   | 64             | PROCESSING |          |
| d1                   | 1.000          | lb         | 1.00     |
| nt                   | 30000          | fn         | not used |
| ct                   | 3072           | DISPLAY    |          |
| TRANSMITTER          |                | sp         | -1046.8  |
| tn                   | C13            | wp         | 18761.7  |
| sfrq                 | 75.424         | rfl        | 1153.0   |
| tof                  | 725.6          | rfp        | 0        |
| tpwr                 | 56             | rp         | -53.0    |
| pw                   | 7.100          | lp         | -202.0   |
| DECOUPLER            |                | PLOT       |          |
| dn                   | H1             | wc         | 250      |
| dof                  | 0              | sc         | 0        |
| dm                   | YYY            | vs         | 309      |
| dmm                  | w              | th         | 166      |
| dpwr                 | 36             | ai         | no       |
| dmf                  | 6500           | ph         |          |

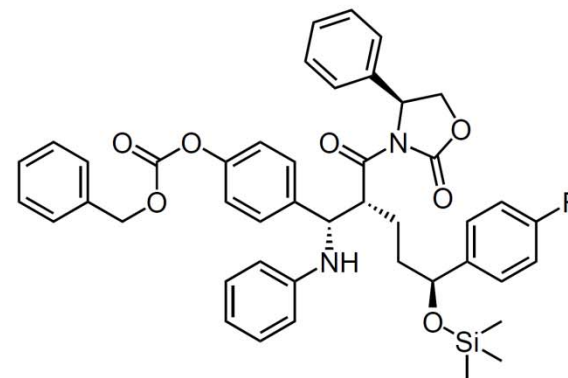

**desfluoro Eze-7**  
 $C_{44}H_{45}FN_2O_7Si$ ; Mol. Wt.: 760,92

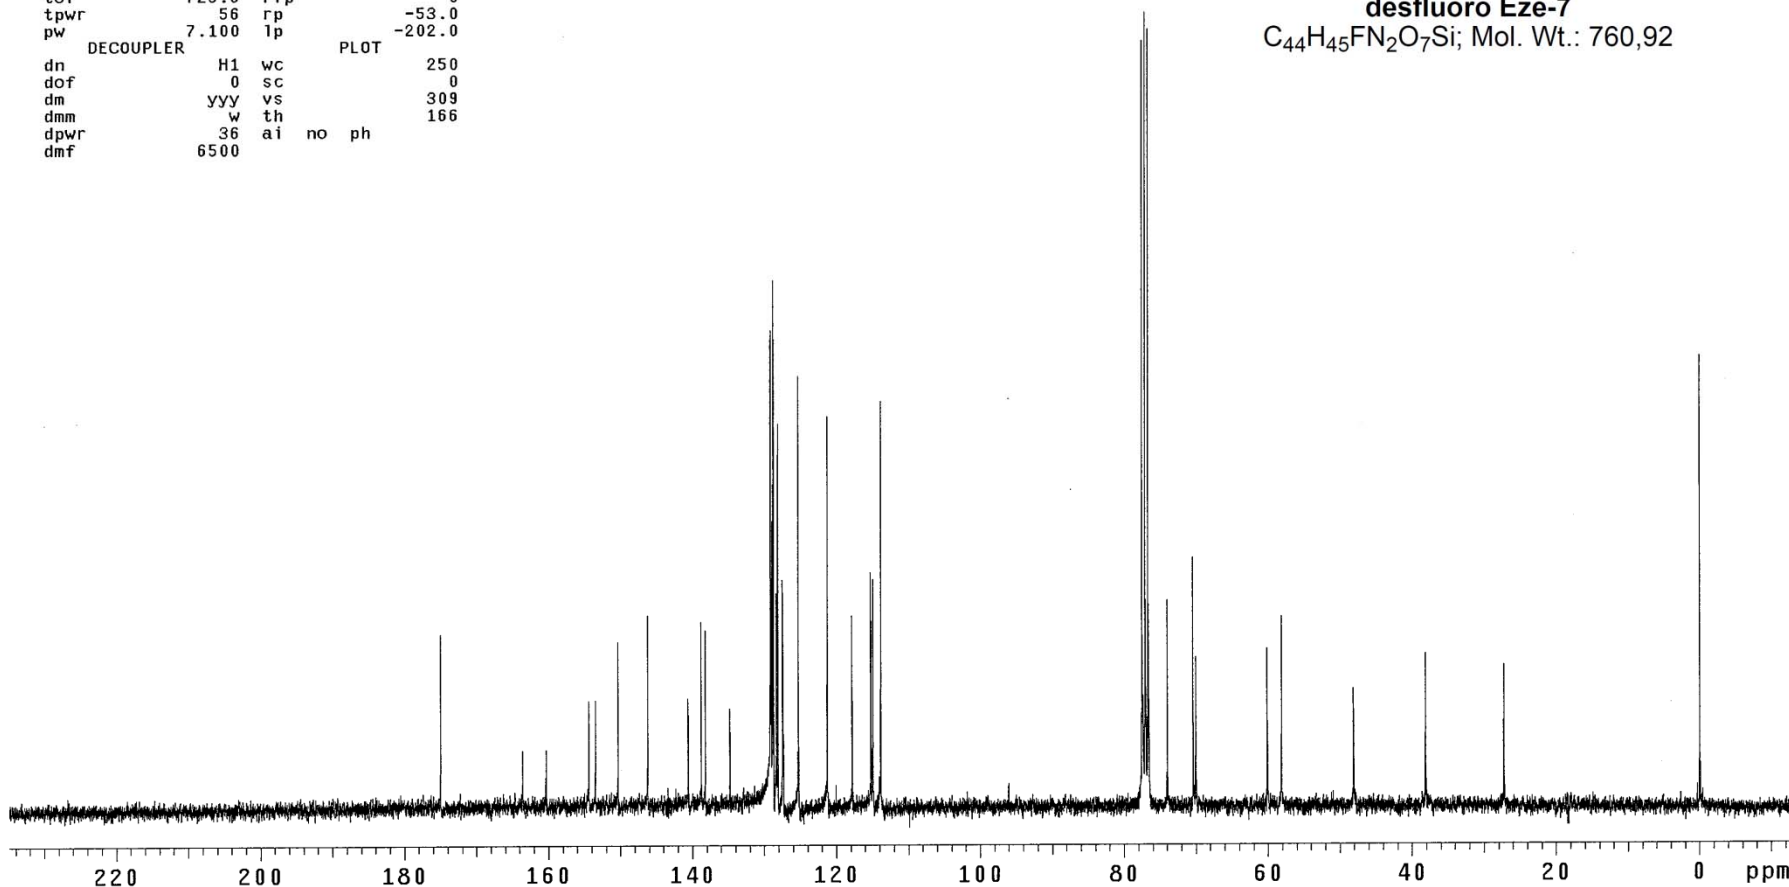

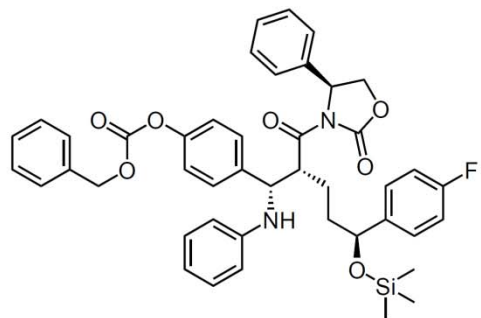

**desfluoro Eze-7**

$C_{44}H_{45}FN_2O_7Si$ ; Mol. Wt.: 760,92

CH3 carbons

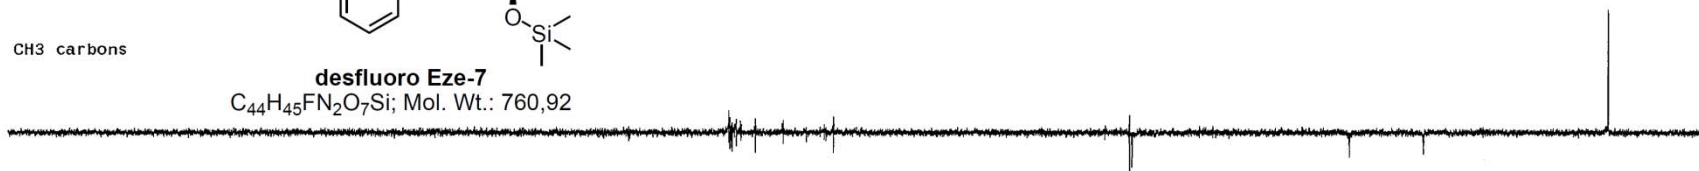

CH2 carbons

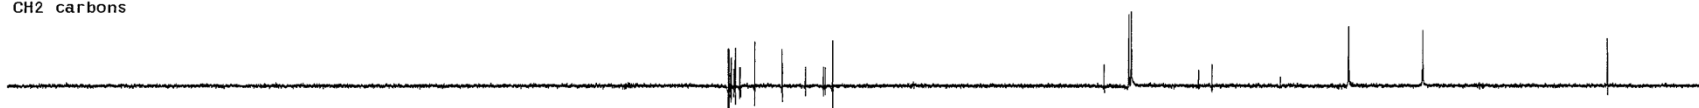

CH carbons

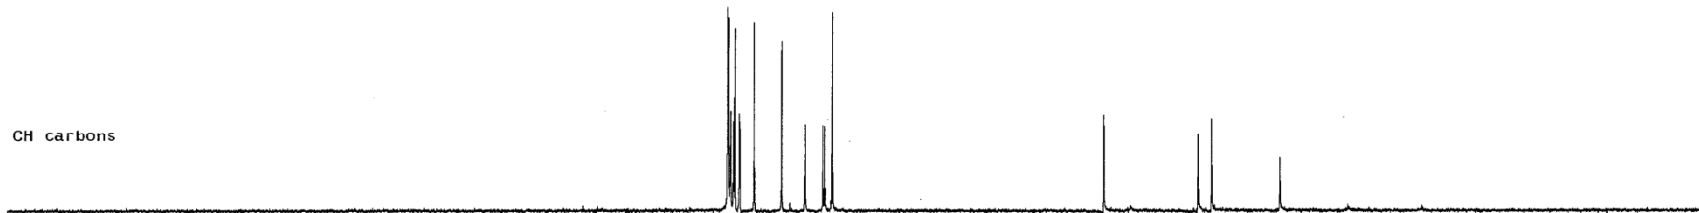

all protonated carbons

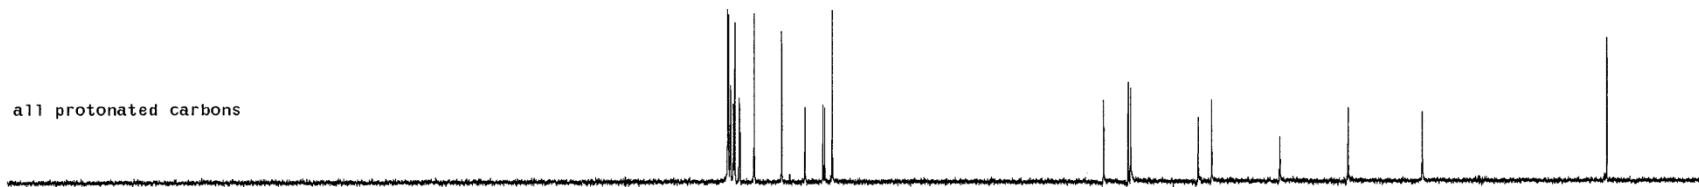

220

200

180

160

140

120

100

80

60

40

20

0

ppm

EB01140

EB01140+ 1 (1.019)

Scan ES+

761.60 2.59e8

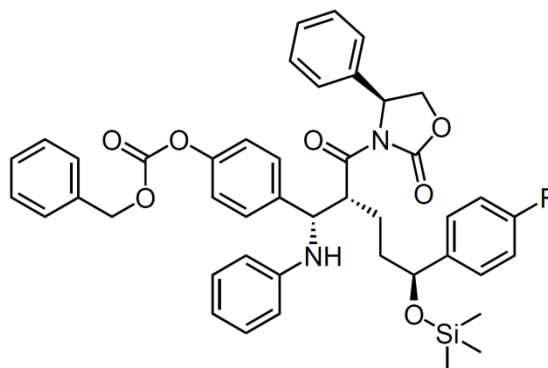

desfluoro Eze-7

C<sub>44</sub>H<sub>45</sub>FN<sub>2</sub>O<sub>7</sub>Si; Mol. Wt.: 760,92

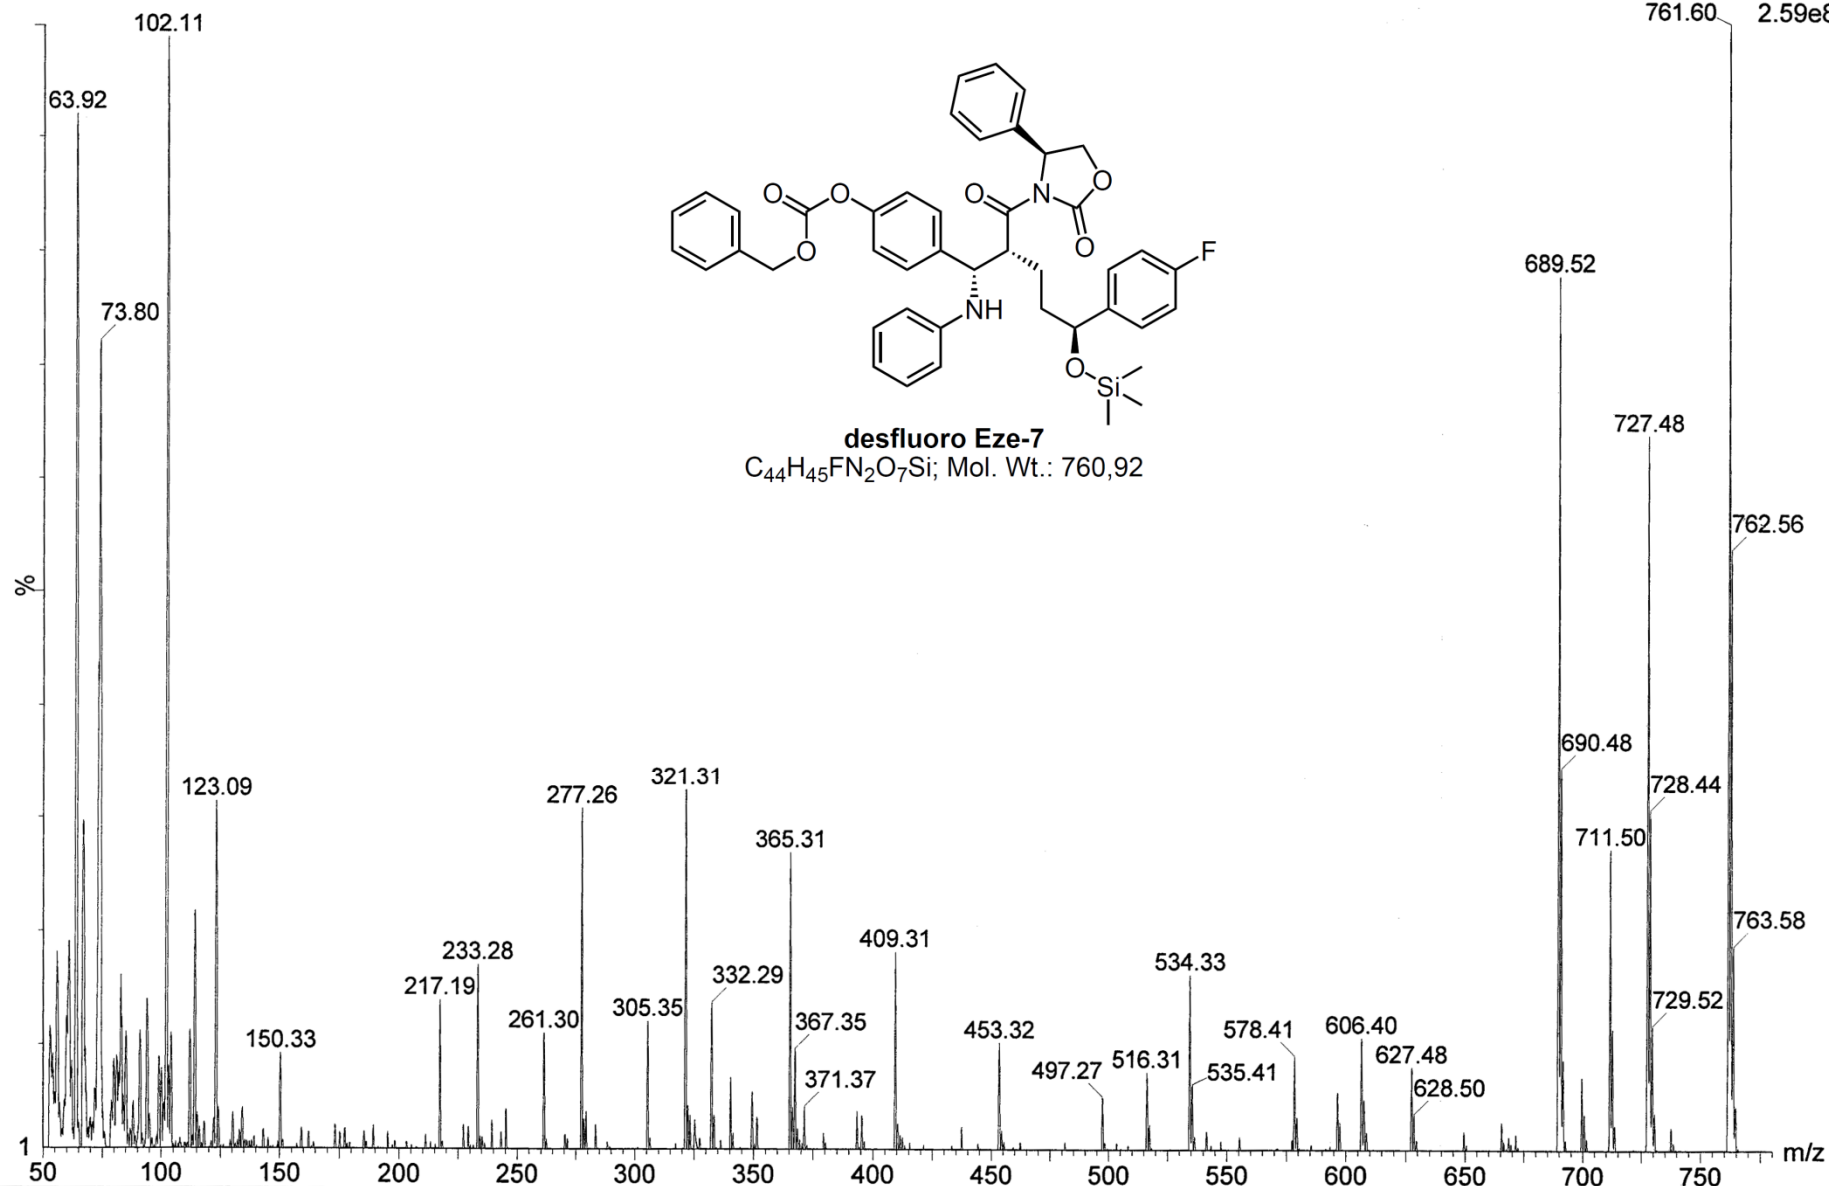

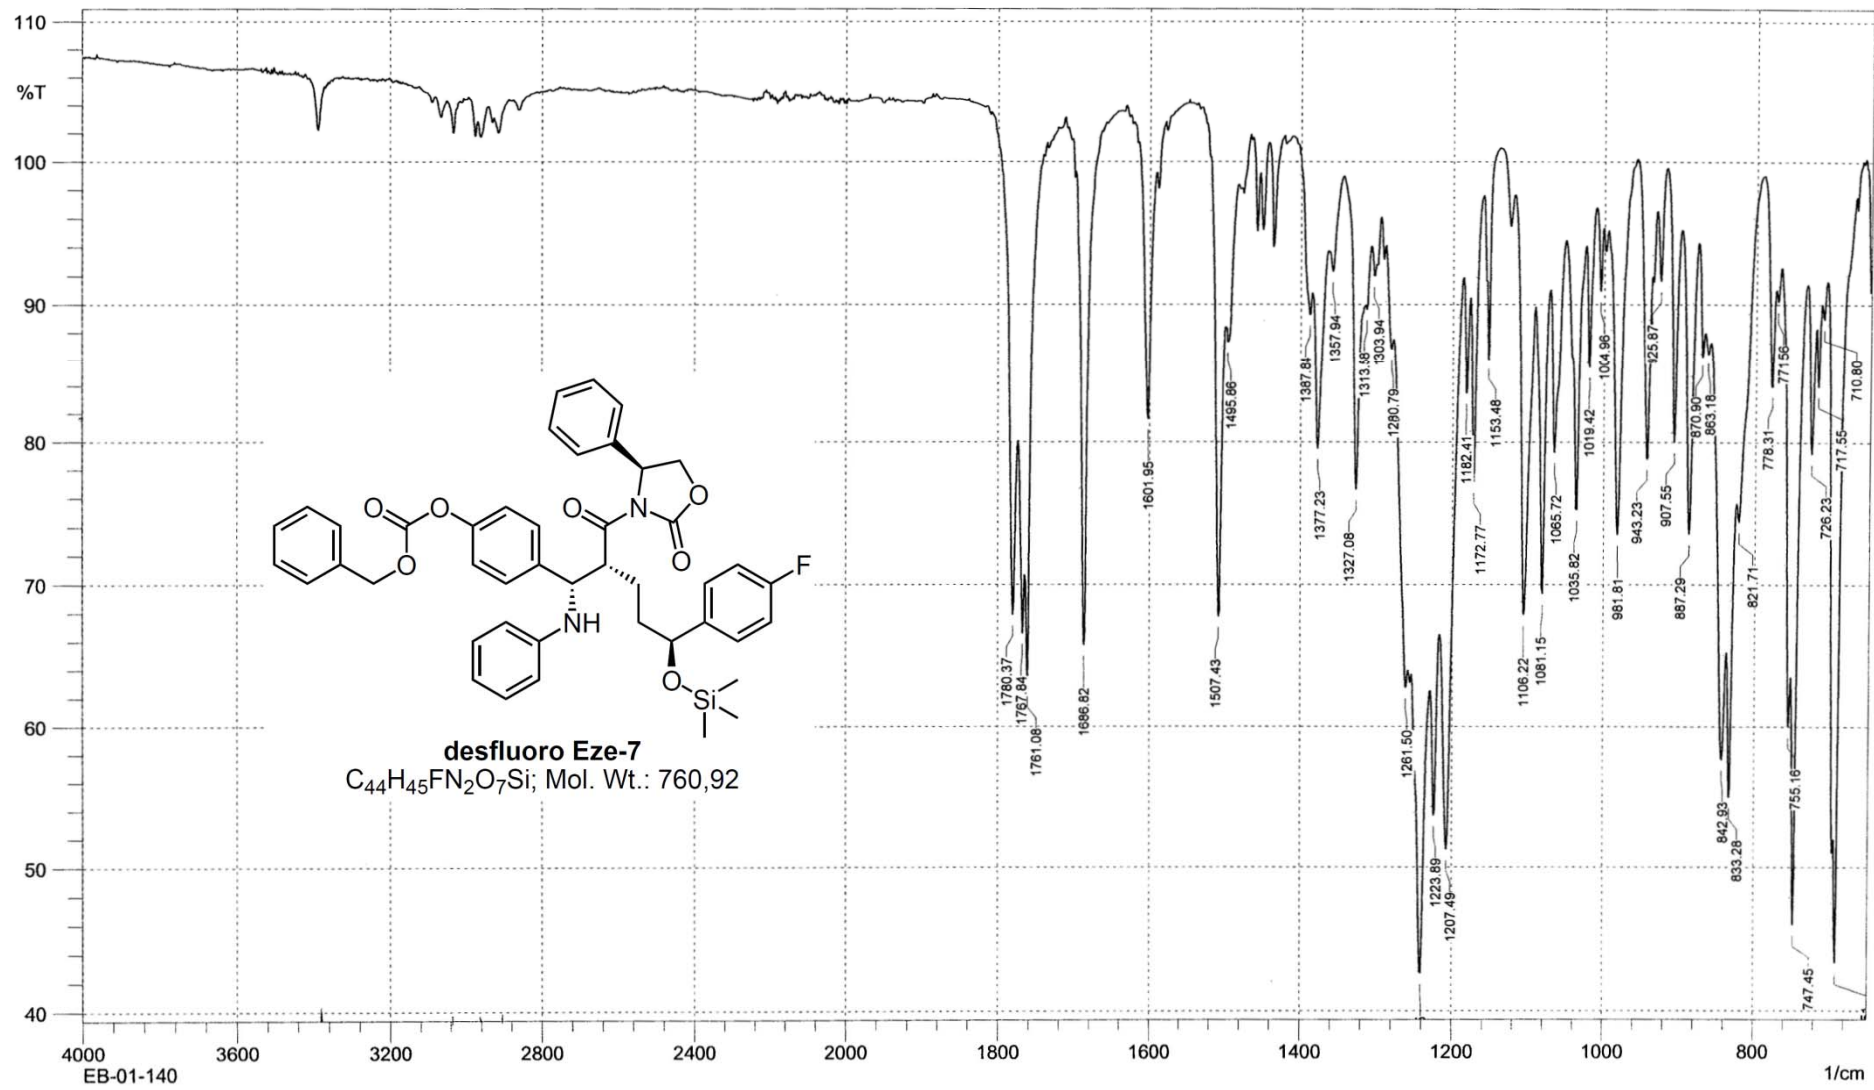

STANDARD 1H OBSERVE

exp7 s2pu1

|                    |                |            |          |
|--------------------|----------------|------------|----------|
| SAMPLE             |                | SPECIAL    |          |
| date               | Nov 16 2009    | temp       | not used |
| solvent            | DMSO           | gain       | not used |
| file               | /export/home/~ | spin       | 20       |
| vnmr1/vnmr         | sys/data/~     | hst        | 0.008    |
| /EB.01.119-EZETIMI | ~              | pw90       | 14.500   |
| BE-DMSO-H.fid      |                | alfa       | 20.000   |
| ACQUISITION        |                | FLAGS      |          |
| sw                 | 4798.5         | il         | n        |
| at                 | 1.998          | in         | n        |
| np                 | 19174          | dp         | y        |
| fb                 | 2600           | hs         | nn       |
| bs                 | 16             | PROCESSING |          |
| d1                 | 1.000          | fn         | not used |
| nt                 | 600            | DISPLAY    |          |
| ct                 | 600            | sp         | -599.4   |
| TRANSMITTER        |                | wp         | 4798.2   |
| tn                 | H1             | rf1        | 599.7    |
| sfrq               | 299.927        | rfp        | 0        |
| tof                | 255.9          | rp         | 82.1     |
| tpwr               | 56             | lp         | -73.7    |
| pw                 | 7.250          | PLOT       |          |
| DECOUPLER          |                | wc         | 250      |
| dn                 | C13            | sc         | 0        |
| dof                | 0              | vs         | 135      |
| dm                 | nnn            | th         | 171      |
| dmm                | c              | ai         | cdc ph   |
| dpwr               | 42             |            |          |
| dmf                | 13100          |            |          |

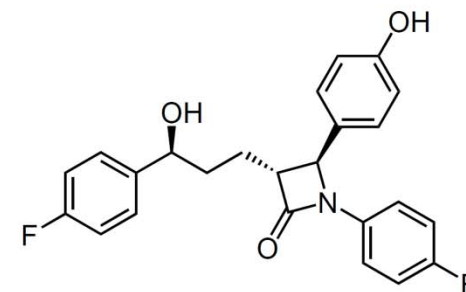

**ezetimibe**  
 $C_{24}H_{21}F_2NO_3$ ; Mol. Wt.: 409,43

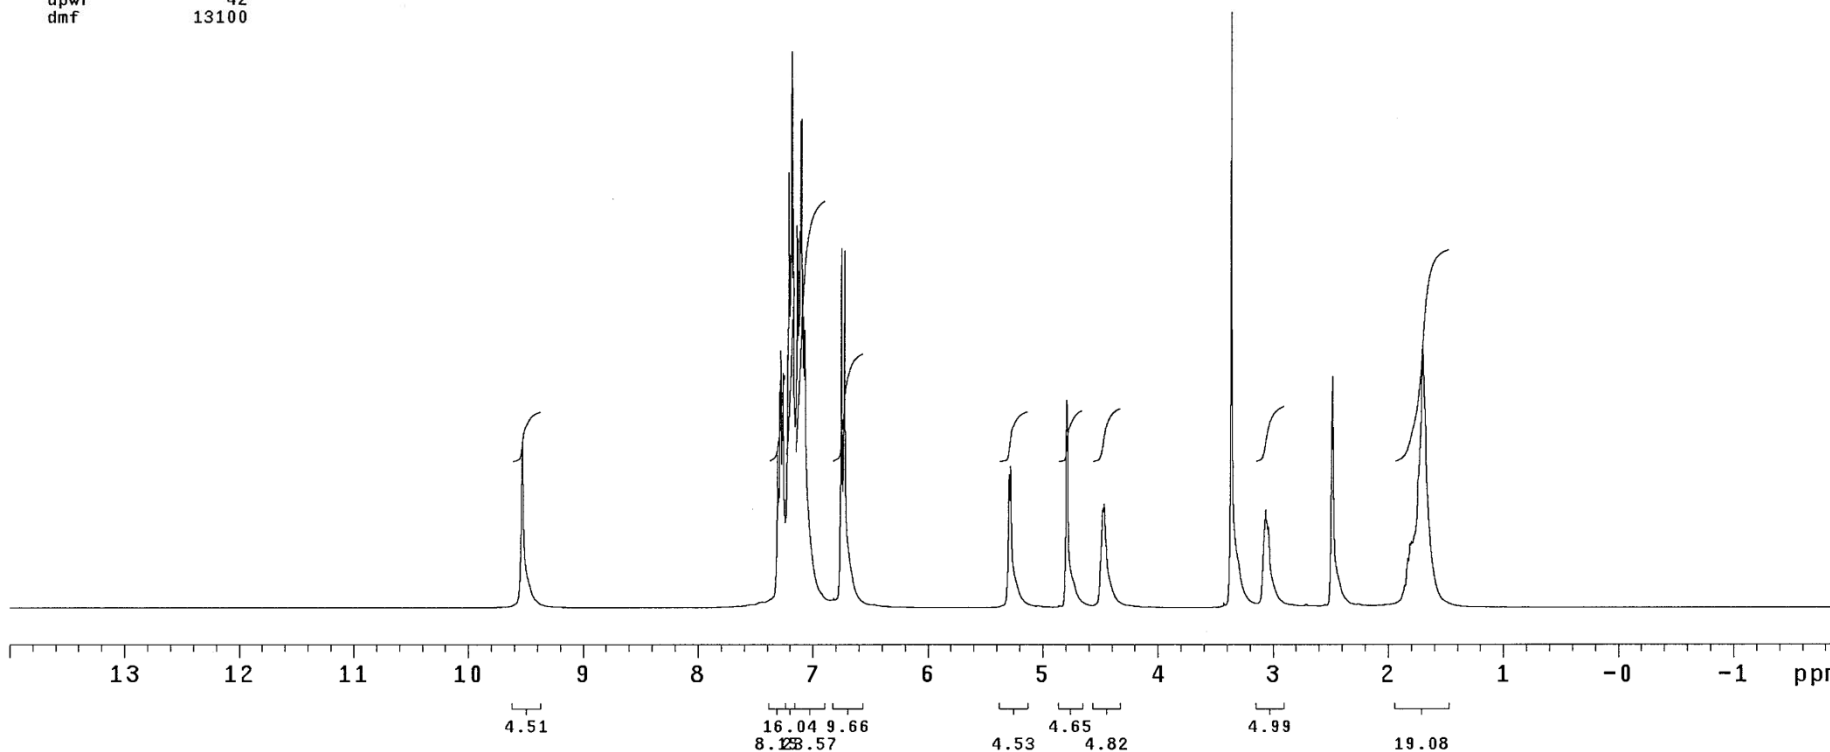



STANDARD 1H OBSERVE

exp7 s2pu1

|                      |                |            |          |
|----------------------|----------------|------------|----------|
| SAMPLE               |                | SPECIAL    |          |
| date                 | Apr 2 2009     | temp       | not used |
| solvent              | CDC13          | gain       | not used |
| file                 | /export/home/~ | spin       | 20       |
| vnmr1/vnmrsys/data/~ |                | hst        | 0.008    |
| /EB.01.119-EZE1-CD~  |                | pw90       | 14.500   |
| CL3-H.fid            |                | alfa       | 20.000   |
| ACQUISITION          |                | FLAGS      |          |
| sw                   | 4798.5         | il         | n        |
| at                   | 1.998          | in         | n        |
| np                   | 19174          | dp         | y        |
| fb                   | 2600           | hs         | nn       |
| bs                   | 16             | PROCESSING |          |
| d1                   | 1.000          | fn         | not used |
| nt                   | 1200           | DISPLAY    |          |
| ct                   | 1200           | sp         | -599.4   |
| TRANSMITTER          |                | wp         | 4798.2   |
| tn                   | H1             | rfl        | 599.7    |
| sfrq                 | 299.926        | rfp        | 0        |
| tof                  | 255.9          | rp         | 70.3     |
| tpwr                 | 56             | lp         | -69.9    |
| pw                   | 7.250          | PLOT       |          |
| DECOUPLER            |                | wc         | 250      |
| dn                   | C13            | sc         | 0        |
| dof                  | 0              | vs         | 149      |
| dm                   | nnn            | th         | 178      |
| dmm                  | c              | ai         | cdc ph   |
| dpwr                 | 41             |            |          |
| dmf                  | 13100          |            |          |

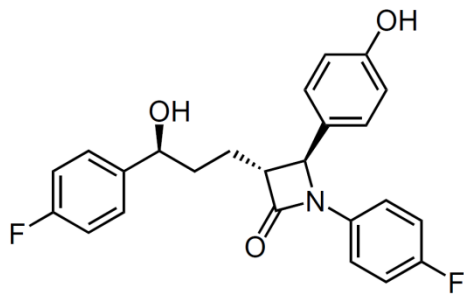

**ezetimibe**  
 $C_{24}H_{21}F_2NO_3$ ; Mol. Wt.: 409,43

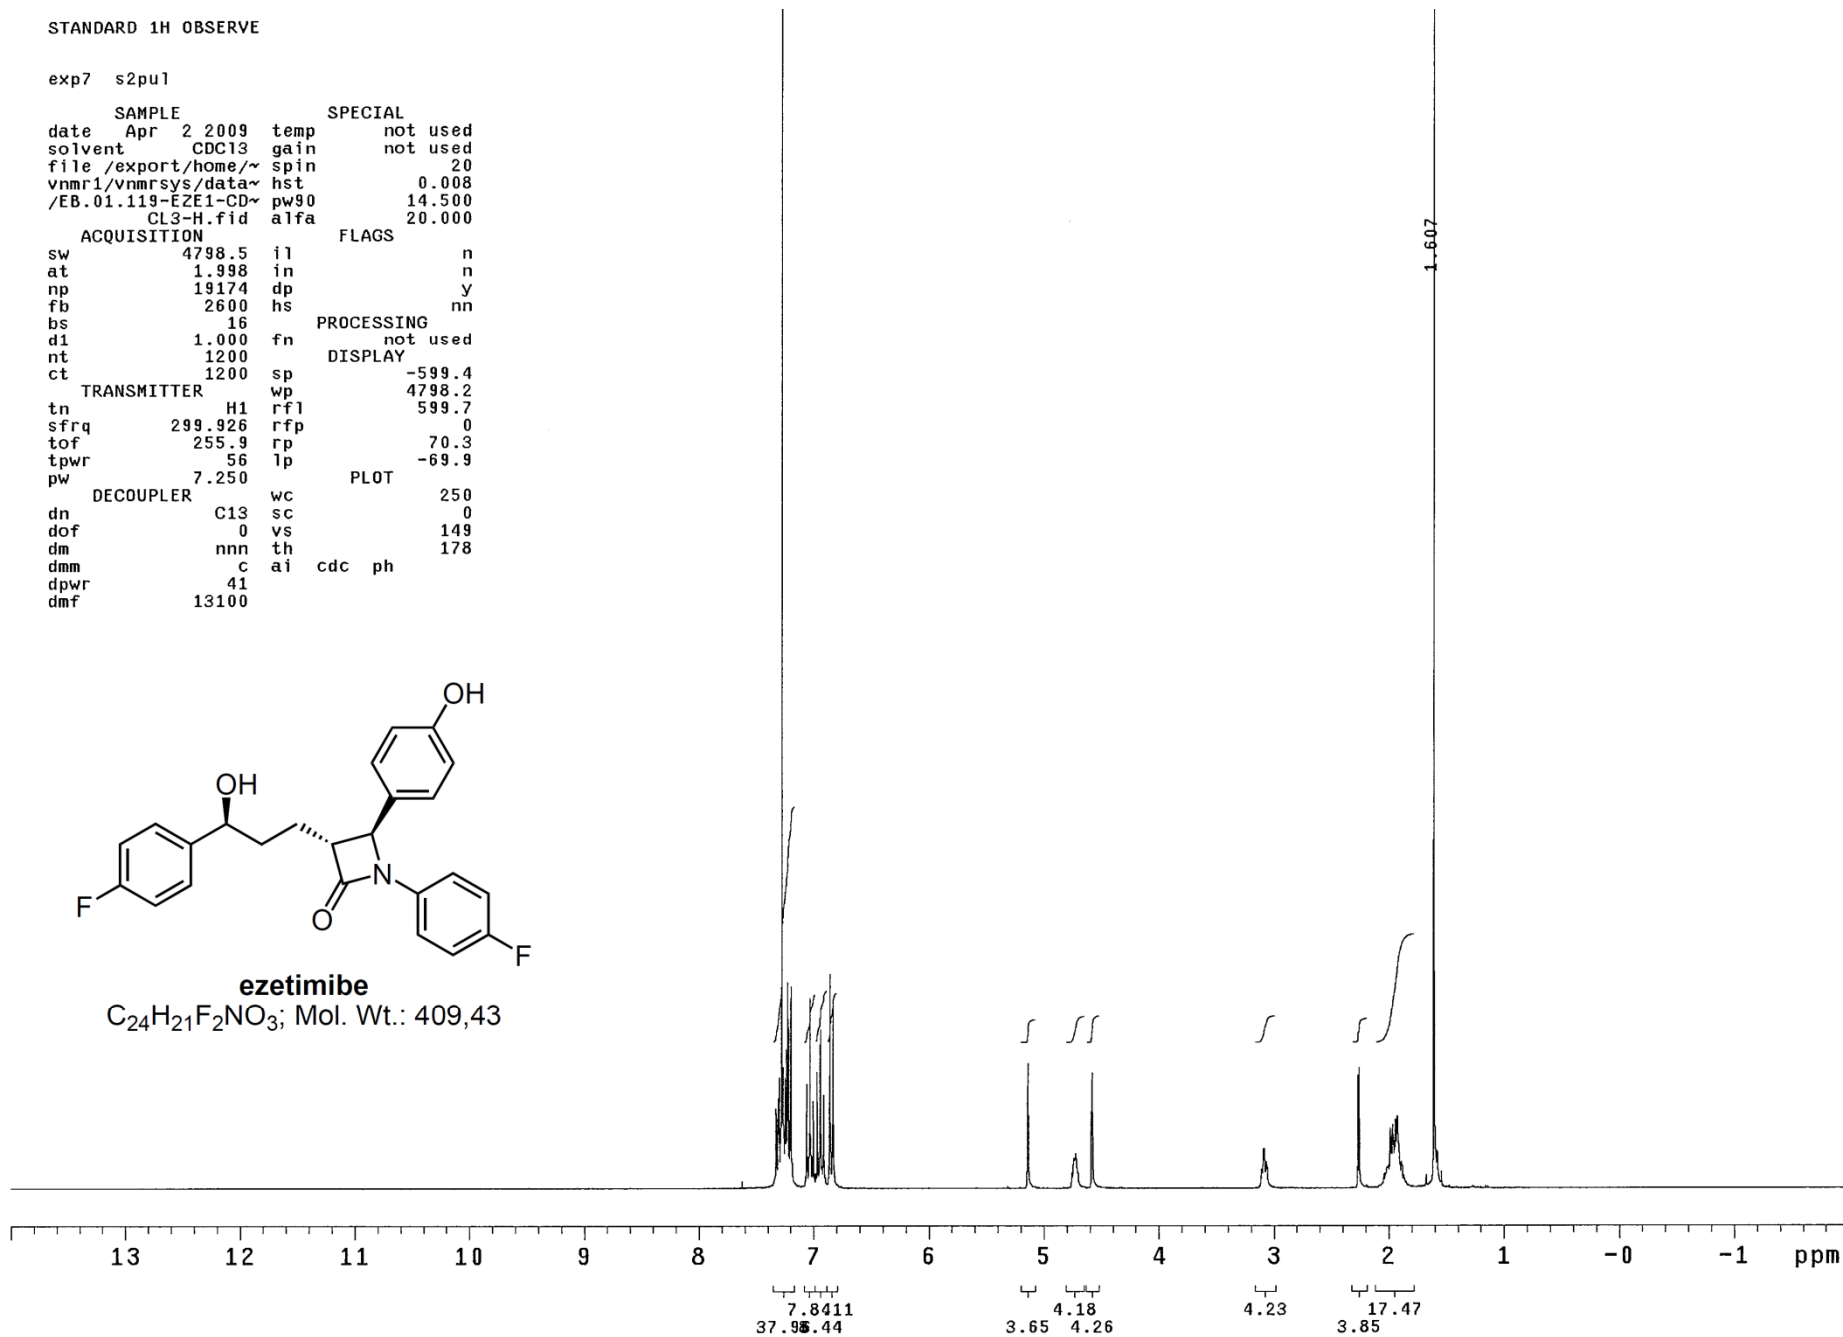

13C OBSERVE

exp7 s2pu1

| SAMPLE               |                | SPECIAL |          |
|----------------------|----------------|---------|----------|
| date                 | Nov 12 2009    | temp    | not used |
| solvent              | DMSO           | gain    | not used |
| file                 | /export/home/~ | spin    | 20       |
| vnmr1/vnmrsys/data/~ |                | hst     | 0.008    |
| /EB.01.119-EZETIMI~  |                | pw90    | 16.750   |
| BE-DMSO-C.fid        | alfa           |         | 20.000   |
| ACQUISITION          |                | FLAGS   |          |
| sw                   | 18867.9        | il      | n        |
| at                   | 1.815          | in      | n        |
| np                   | 68492          | dp      | y        |
| fb                   | 10400          | hs      | nn       |
| bs                   | 64             |         |          |
| PROCESSING           |                | 1b      | 1.00     |
| d1                   | 1.000          | fn      | not used |
| nt                   | 30000          |         |          |
| ct                   | 512            | DISPLAY |          |
| TRANSMITTER          |                | sp      | -1031.9  |
| tn                   | C13            | wp      | 18761.7  |
| sfrq                 | 75.425         | rfl     | 1138.2   |
| tof                  | 725.6          | rfp     | 0        |
| tpwr                 | 56             | rp      | -21.5    |
| pw                   | 8.375          | lp      | -219.8   |
| DECOUPLER            |                | PLOT    |          |
| dn                   | H1             | wc      | 250      |
| dof                  | 0              | sc      | 0        |
| dm                   | yyy            | vs      | 154      |
| dmm                  | w              | th      | 97       |
| dpwr                 | 36             | ai      | no       |
| dmf                  | 6500           | ph      |          |

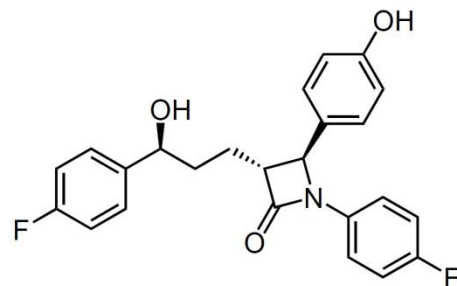

ezetimibe  
 $C_{24}H_{21}F_2NO_3$ ; Mol. Wt.: 409,43

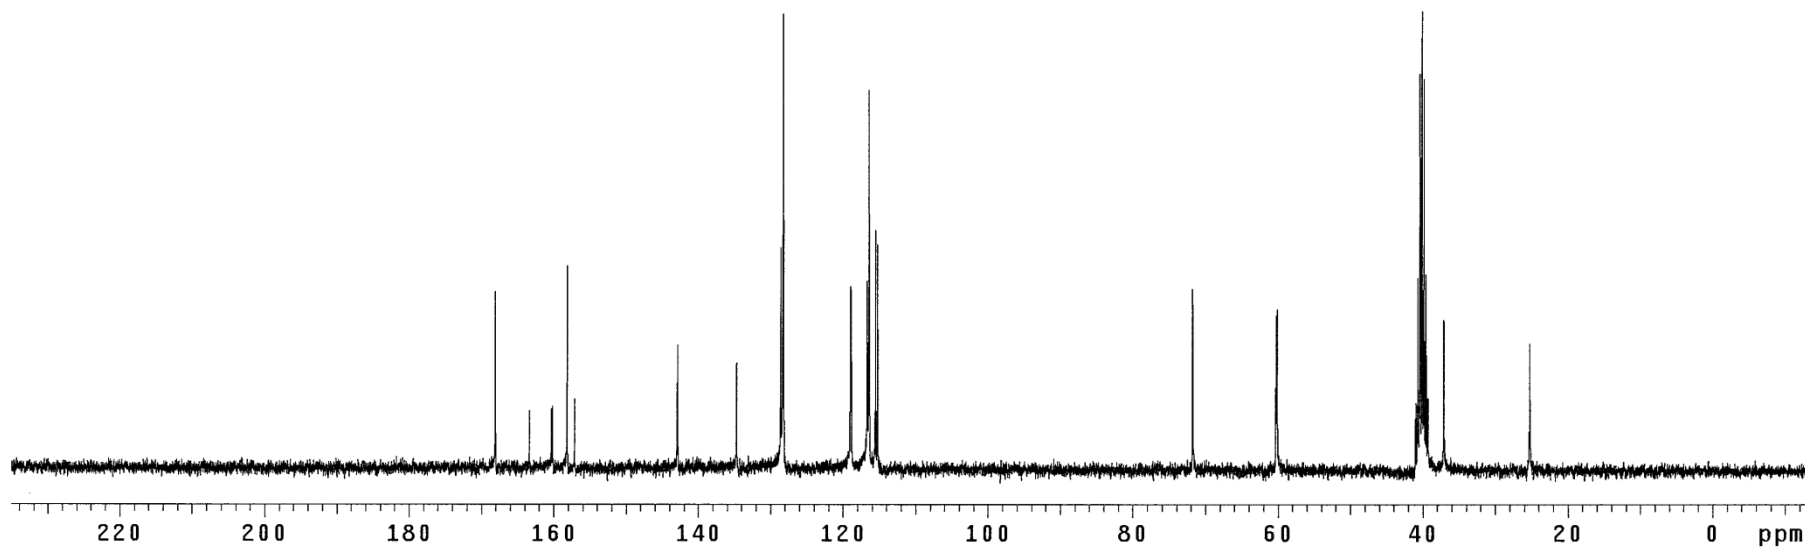

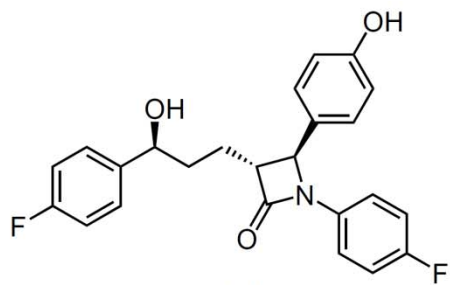

**ezetimibe**

$C_{24}H_{21}F_2NO_3$ ; Mol. Wt.: 409,43

CH3 carbons

CH2 carbons

CH carbons

all protonated carbons

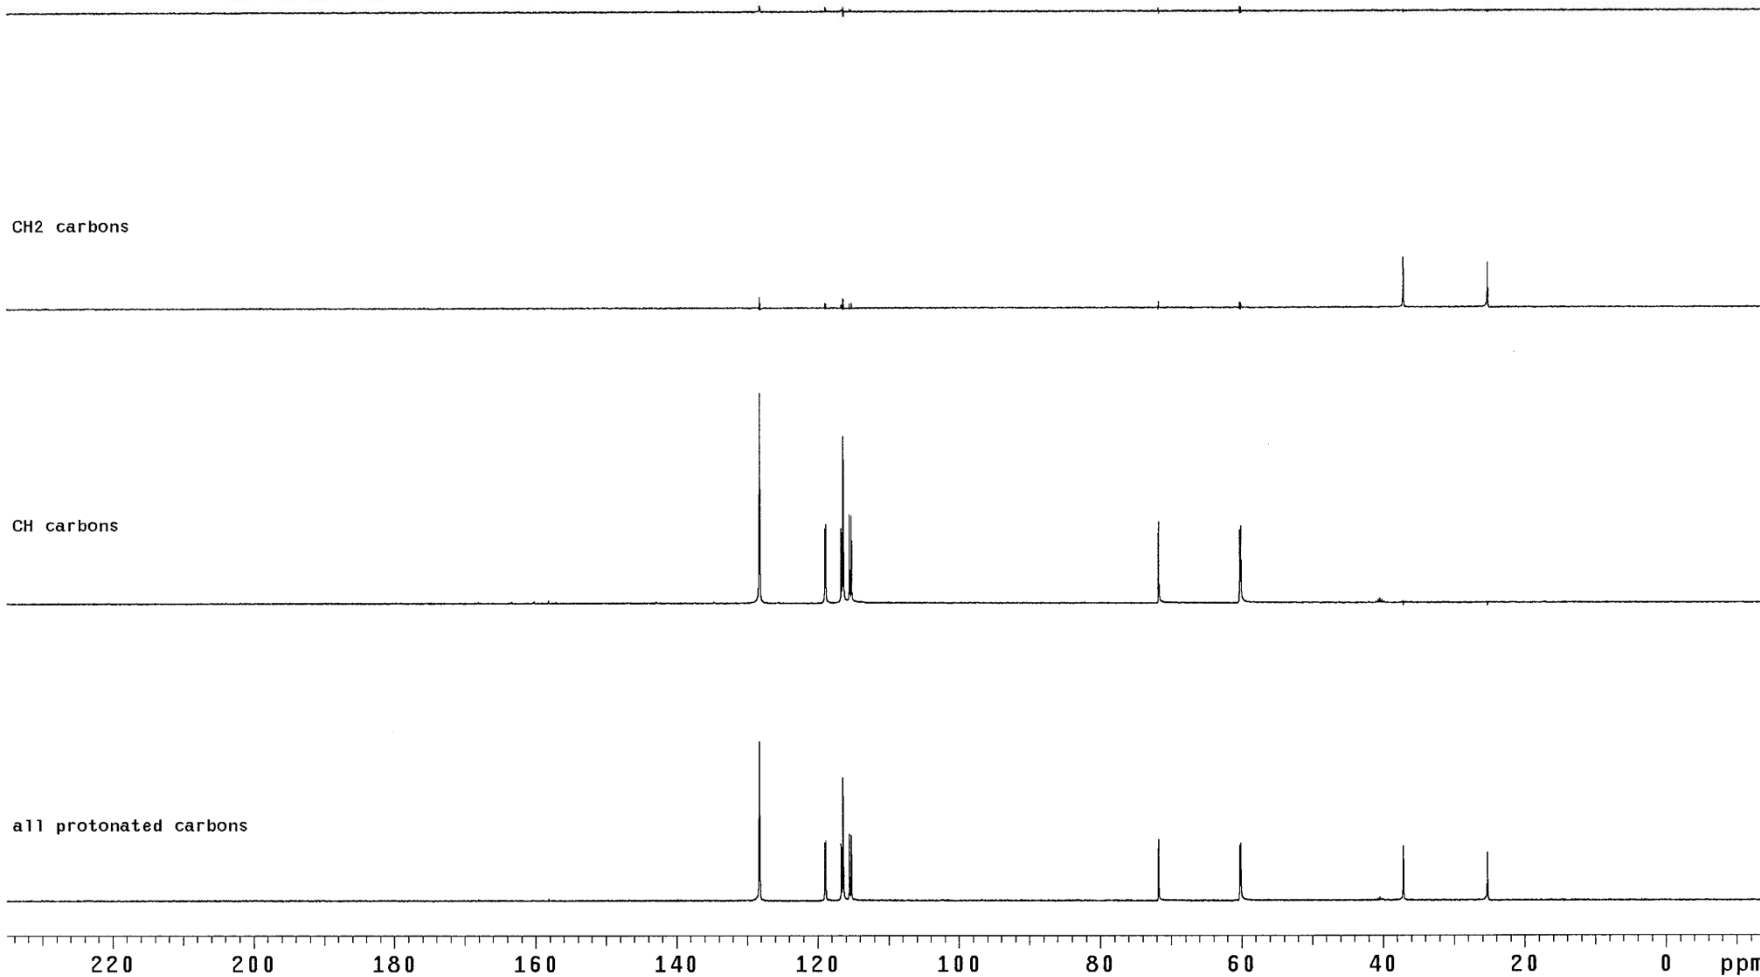

Ezetimibe

Sample Name:  
Ezetimibe  
Data Collected on:  
Varian-NMR-mercury300  
Archive directory:  
/home/vnmr1/vnmrsys/data/Esen  
Sample directory:  
Ezetimibe\_20100217\_01  
FidFile: FLUORINE\_001

Pulse Sequence: FLUORINE (s2pu1)  
Solvent: dmsd  
Data collected on: Feb 18 2010

Temp. 20.0 C / 293.1 K  
Operator: Esen

Relax. delay 1.000 sec  
Pulse 30.0 degrees  
Acq. time 0.986 sec  
Width 64935.1 Hz  
16 repetitions  
OBSERVE F19, 282.2119105 MHz  
DATA PROCESSING  
FT size 262144  
Total time 0 min 40 sec

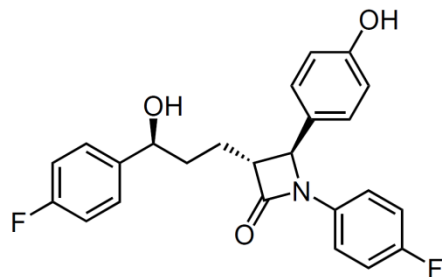

**ezetimibe**  
 $C_{24}H_{21}F_2NO_3$ ; Mol. Wt.: 409,43

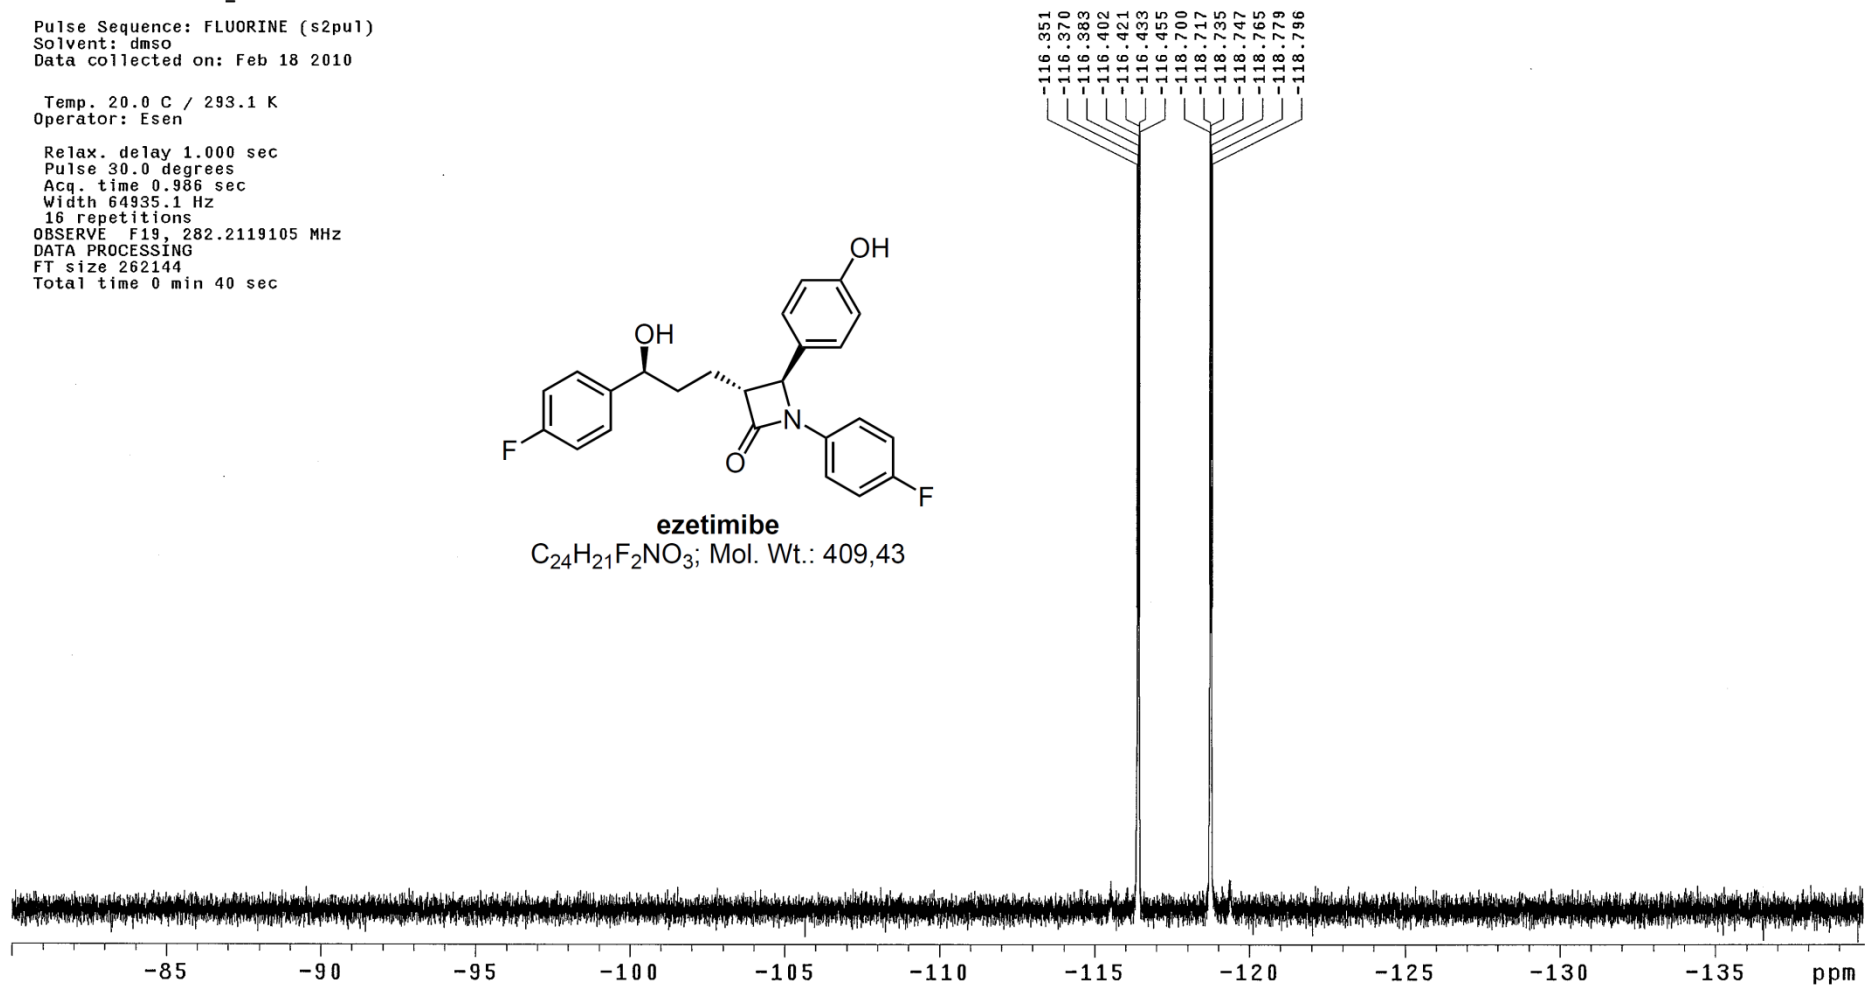

**EZETIMIBE**

EZETIMIBE++ 1 (1.019)

Scan ES+  
1.61e8

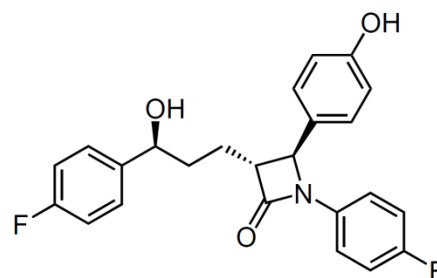

**ezetimibe**  
C<sub>24</sub>H<sub>21</sub>F<sub>2</sub>NO<sub>3</sub>; Mol. Wt.: 409,43

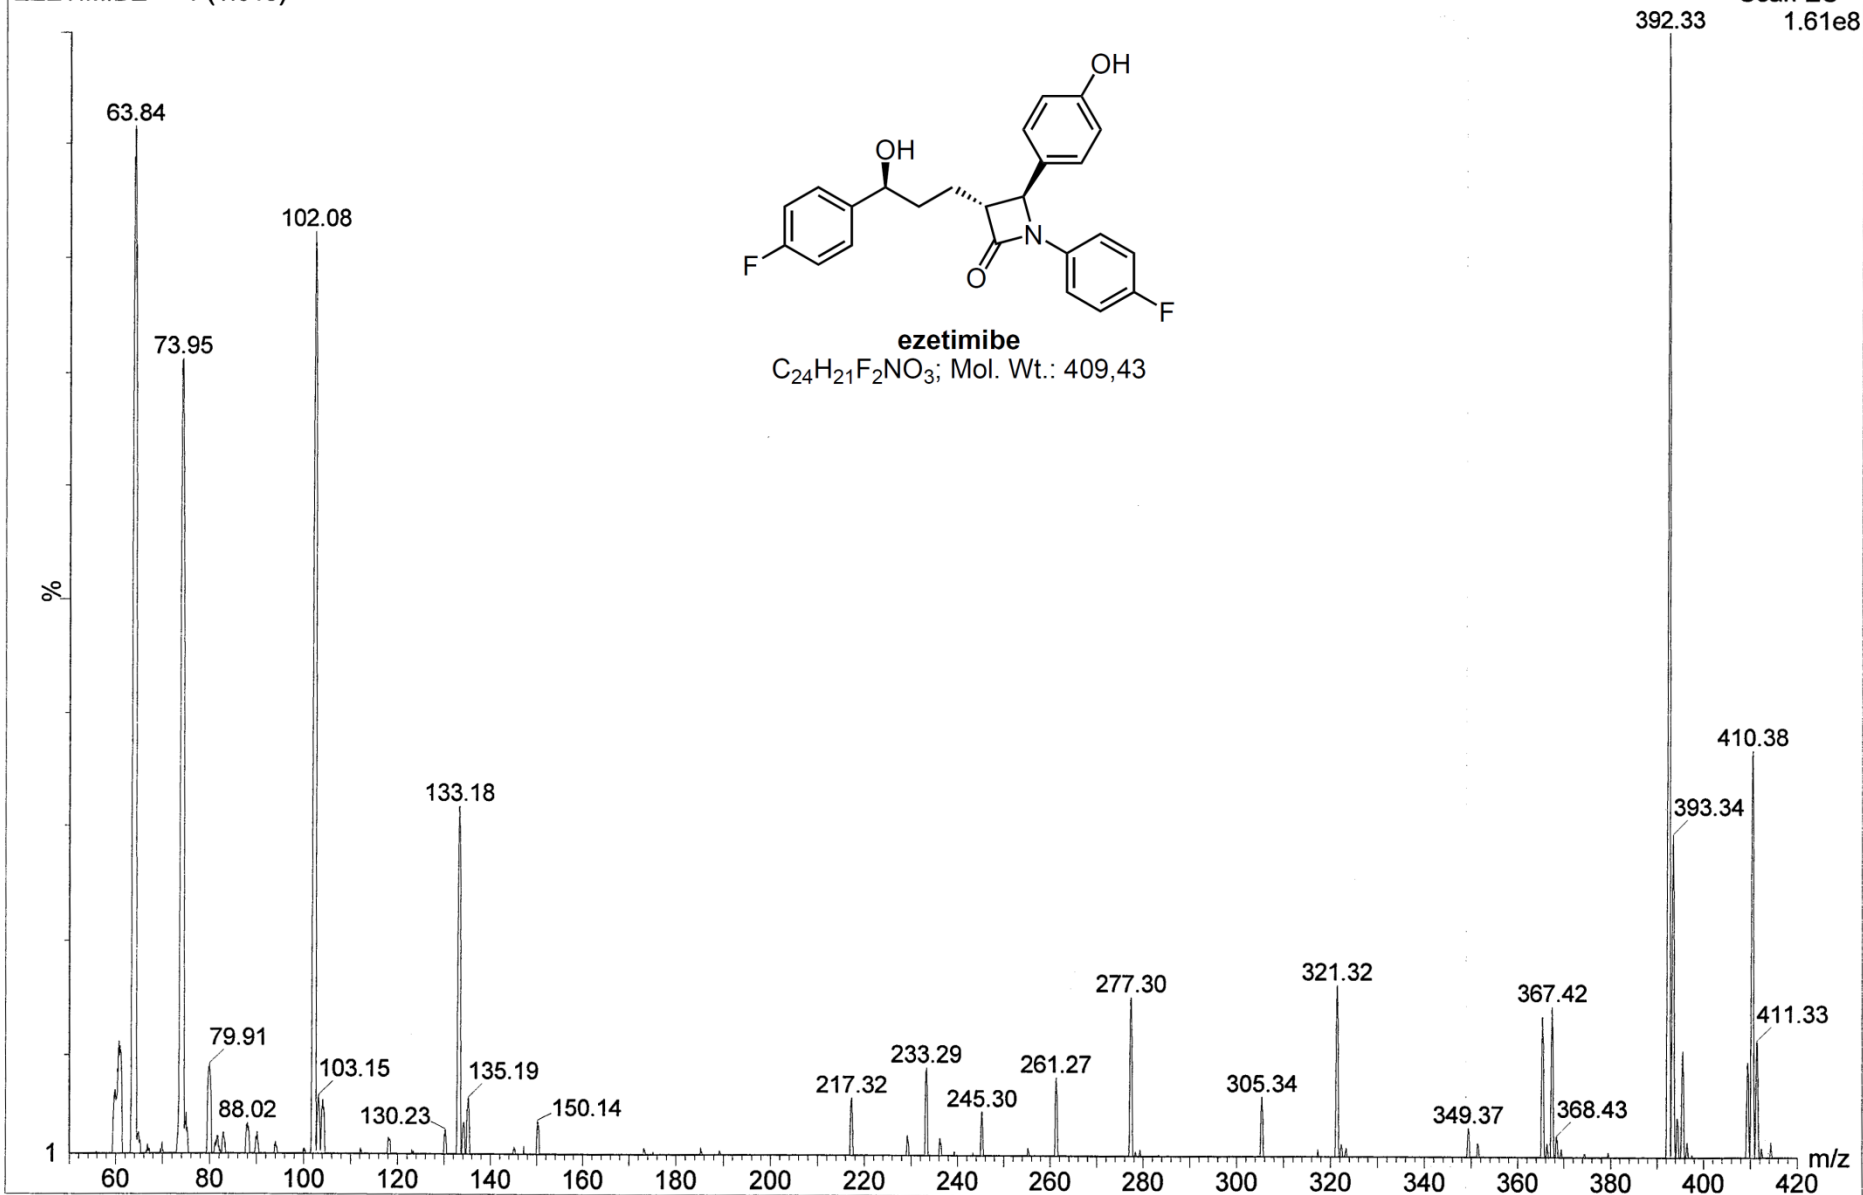

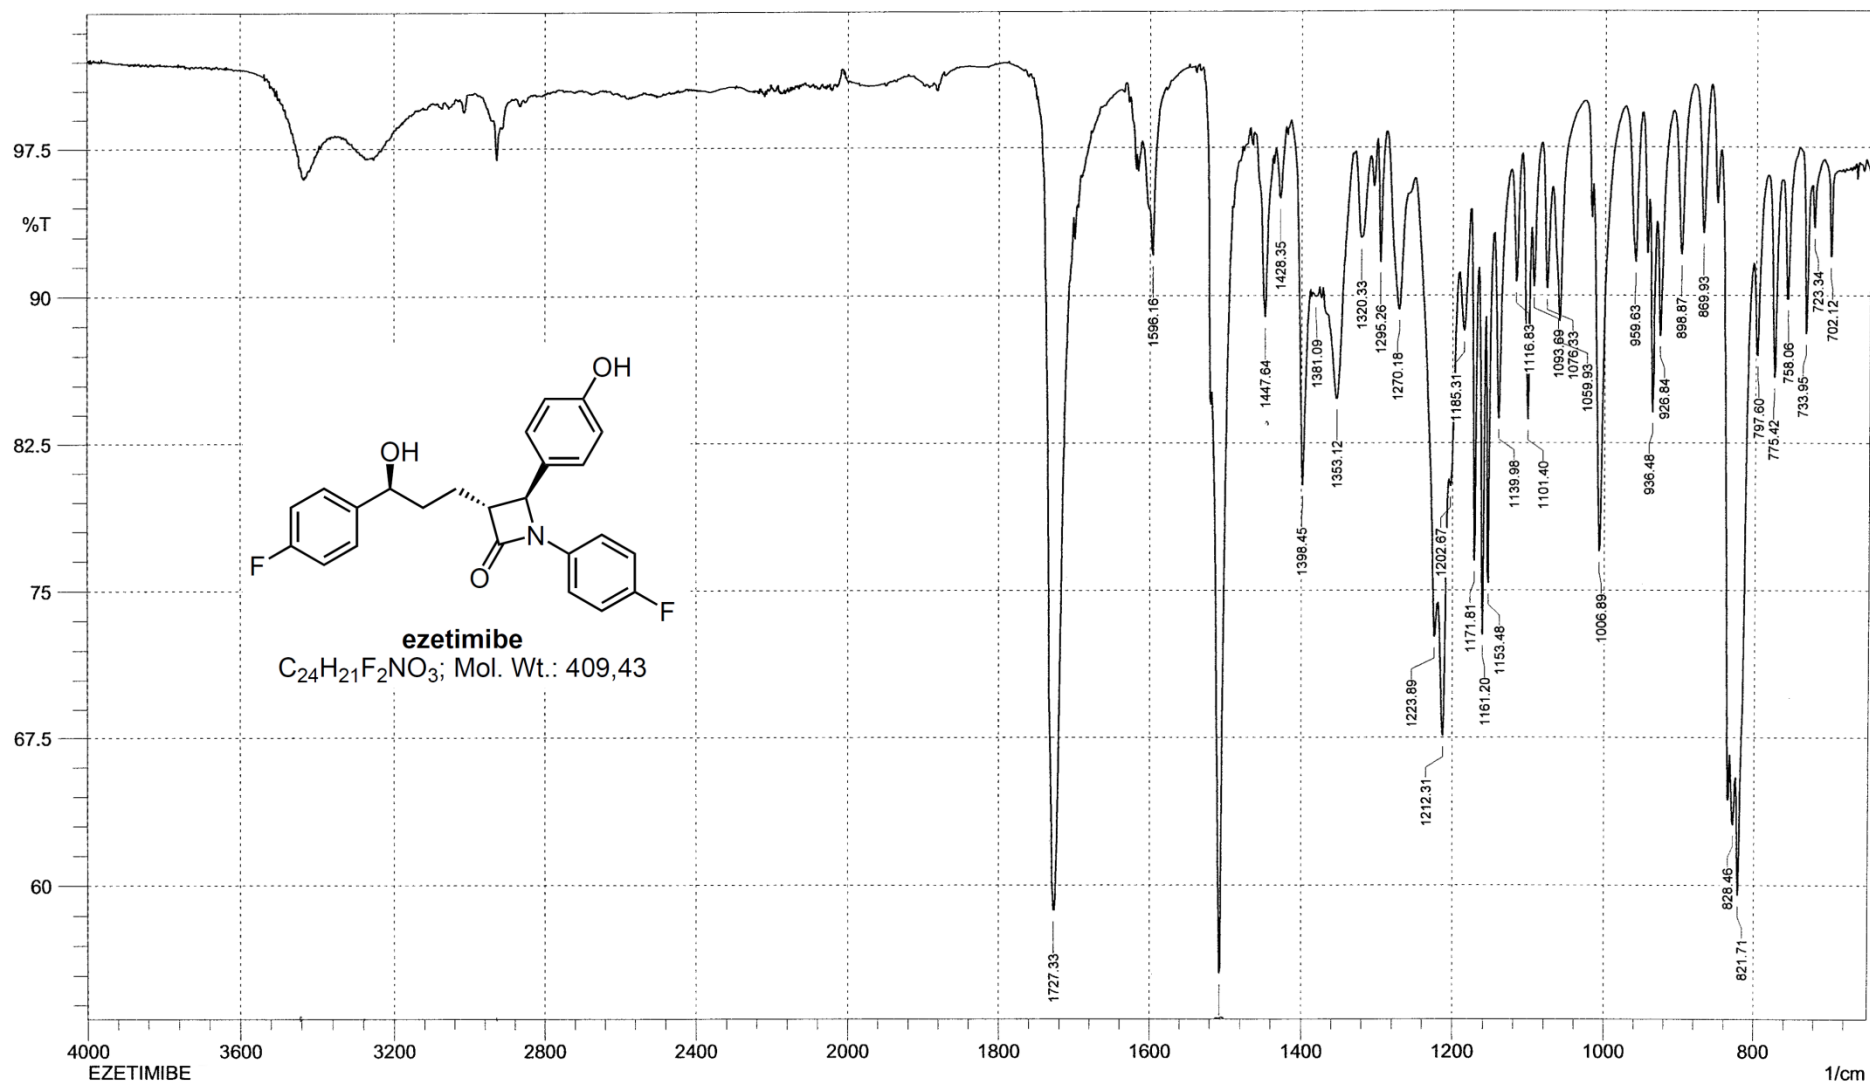

STANDARD 1H OBSERVE

exp5 s2pu1

|                    |                |            |          |
|--------------------|----------------|------------|----------|
| SAMPLE             |                | SPECIAL    |          |
| date               | Feb 1 2010     | temp       | not used |
| solvent            | DMSO           | gain       | not used |
| file               | /export/home/~ | spin       | 20       |
| vnmr1/vnmr         | sys/data/~     | hst        | 0.008    |
| /EB.01.141-DMSO-H. | ~              | pw90       | 14.500   |
|                    | fid            | alfa       | 20.000   |
| ACQUISITION        |                | FLAGS      |          |
| sw                 | 4798.5         | il         | n        |
| at                 | 1.998          | in         | n        |
| np                 | 19174          | dp         | y        |
| fb                 | 2600           | hs         | nn       |
| bs                 | 16             | PROCESSING |          |
| d1                 | 1.000          | fn         | not used |
| nt                 | 1200           | DISPLAY    |          |
| ct                 | 1200           | sp         | -599.4   |
| TRANSMITTER        |                | wp         | 4798.2   |
| tn                 | H1             | rfl        | 599.7    |
| sfrq               | 299.927        | rfp        | 0        |
| tof                | 255.9          | rp         | 71.9     |
| tpwr               | 56             | lp         | -75.1    |
| pw                 | 7.250          | PLOT       |          |
| DECOUPLER          |                | wc         | 250      |
| dn                 | C13            | sc         | 0        |
| dof                | 0              | vs         | 208      |
| dm                 | nnn            | th         | 177      |
| dmm                | c              | ai         | cdc ph   |
| dpwr               | 42             |            |          |
| dmf                | 13100          |            |          |

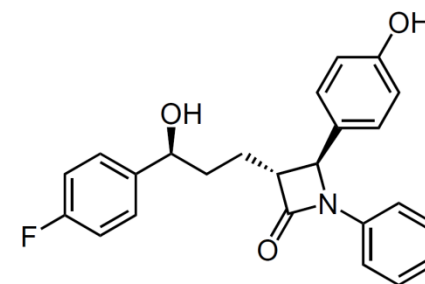

**desfluoro ezetimibe**  
 $C_{24}H_{22}FNO_3$ ; Mol. Wt.: 391,43

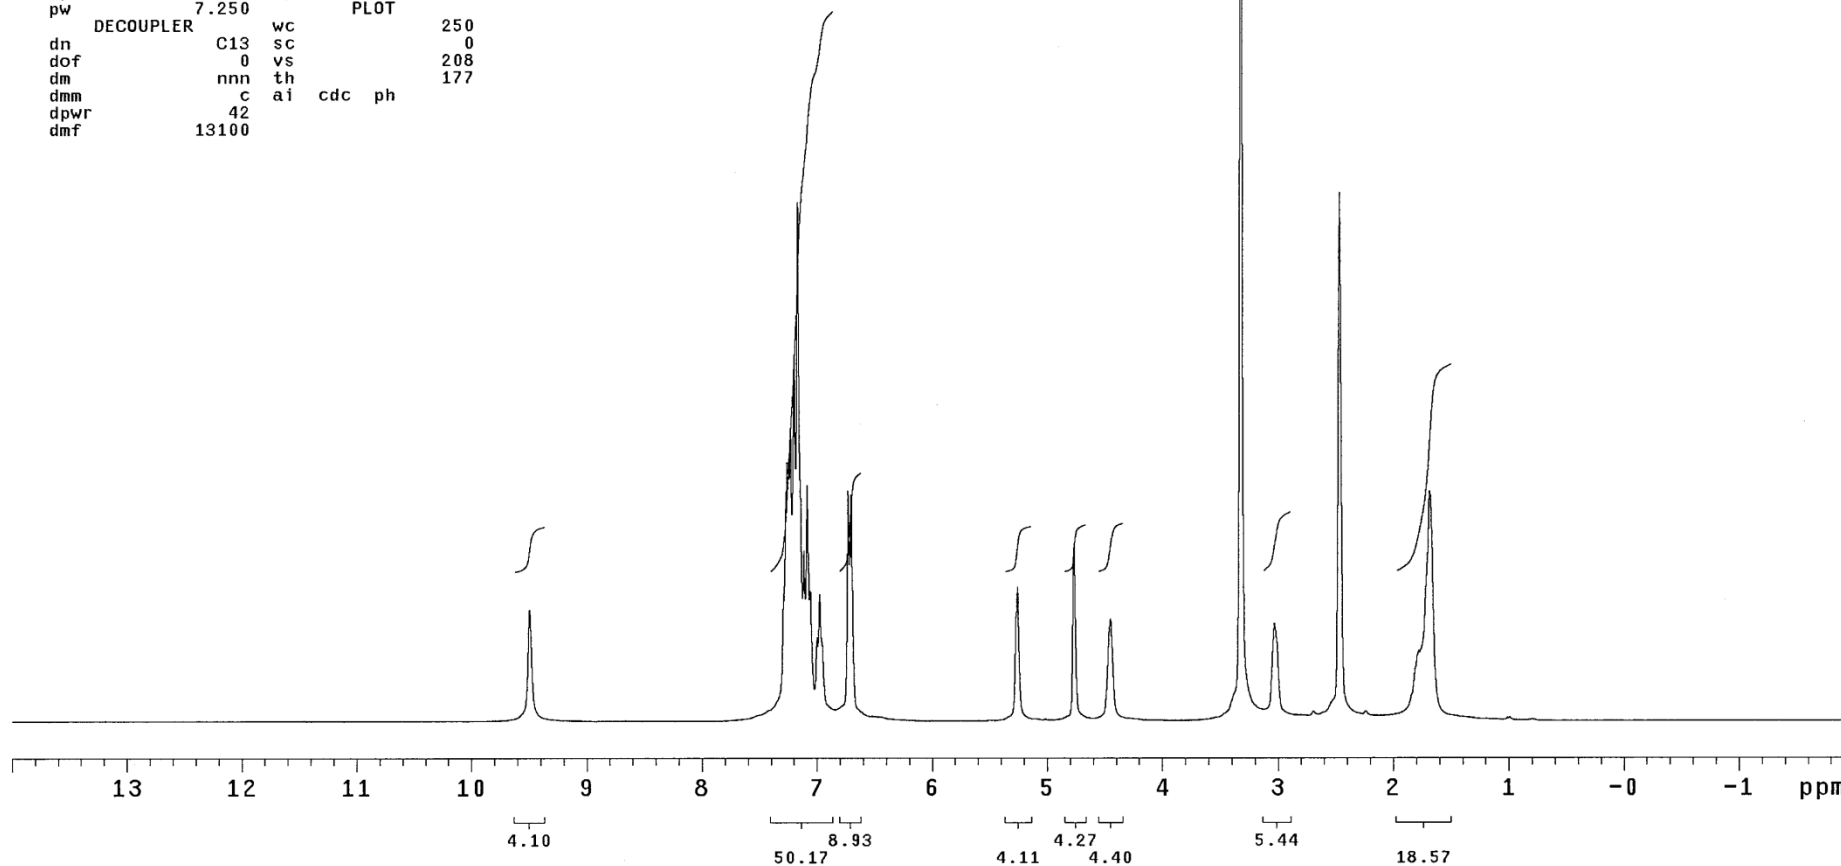

13C OBSERVE

exp5 s2pu1

|                      |                |            |          |
|----------------------|----------------|------------|----------|
| SAMPLE               |                | SPECIAL    |          |
| date                 | Feb 1 2010     | temp       | not used |
| solvent              | DMSO           | gain       | not used |
| file                 | /export/home/~ | spin       | 20       |
| vnmr1/vnmrsys/data/~ |                | hst        | 0.008    |
| /EB.01.141-DMSO-C.~  |                | pw90       | 16.750   |
|                      | fid            | alfa       | 20.000   |
| ACQUISITION          |                | FLAGS      |          |
| sw                   | 18867.9        | il         | n        |
| at                   | 1.815          | in         | n        |
| np                   | 68492          | dp         | y        |
| fb                   | 10400          | hs         | nn       |
| bs                   | 64             | PROCESSING |          |
| d1                   | 1.000          | lb         | 1.00     |
| nt                   | 30000          | fn         | not used |
| ct                   | 30000          | DISPLAY    |          |
| TRANSMITTER          |                | sp         | -1031.9  |
| tn                   | C13            | wp         | 18761.7  |
| sfrq                 | 75.425         | rf1        | 1138.2   |
| tof                  | 725.6          | rfp        | 0        |
| tpwr                 | 56             | rp         | -7.1     |
| pw                   | 8.375          | lp         | -254.9   |
| DECOUPLER            |                | PLOT       |          |
| dn                   | H1             | wc         | 250      |
| dof                  | 0              | sc         | 0        |
| dm                   | yyy            | vs         | 518      |
| dmm                  | w              | th         | 178      |
| dpwr                 | 36             | ai         | no       |
| dmf                  | 6500           | ph         |          |

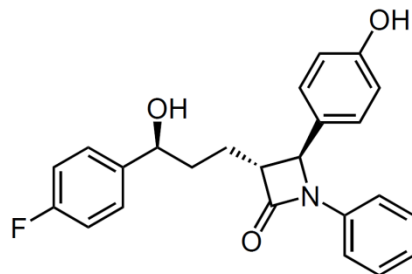

**desfluoro ezetimibe**  
C<sub>24</sub>H<sub>22</sub>FNO<sub>3</sub>; Mol. Wt.: 391,43

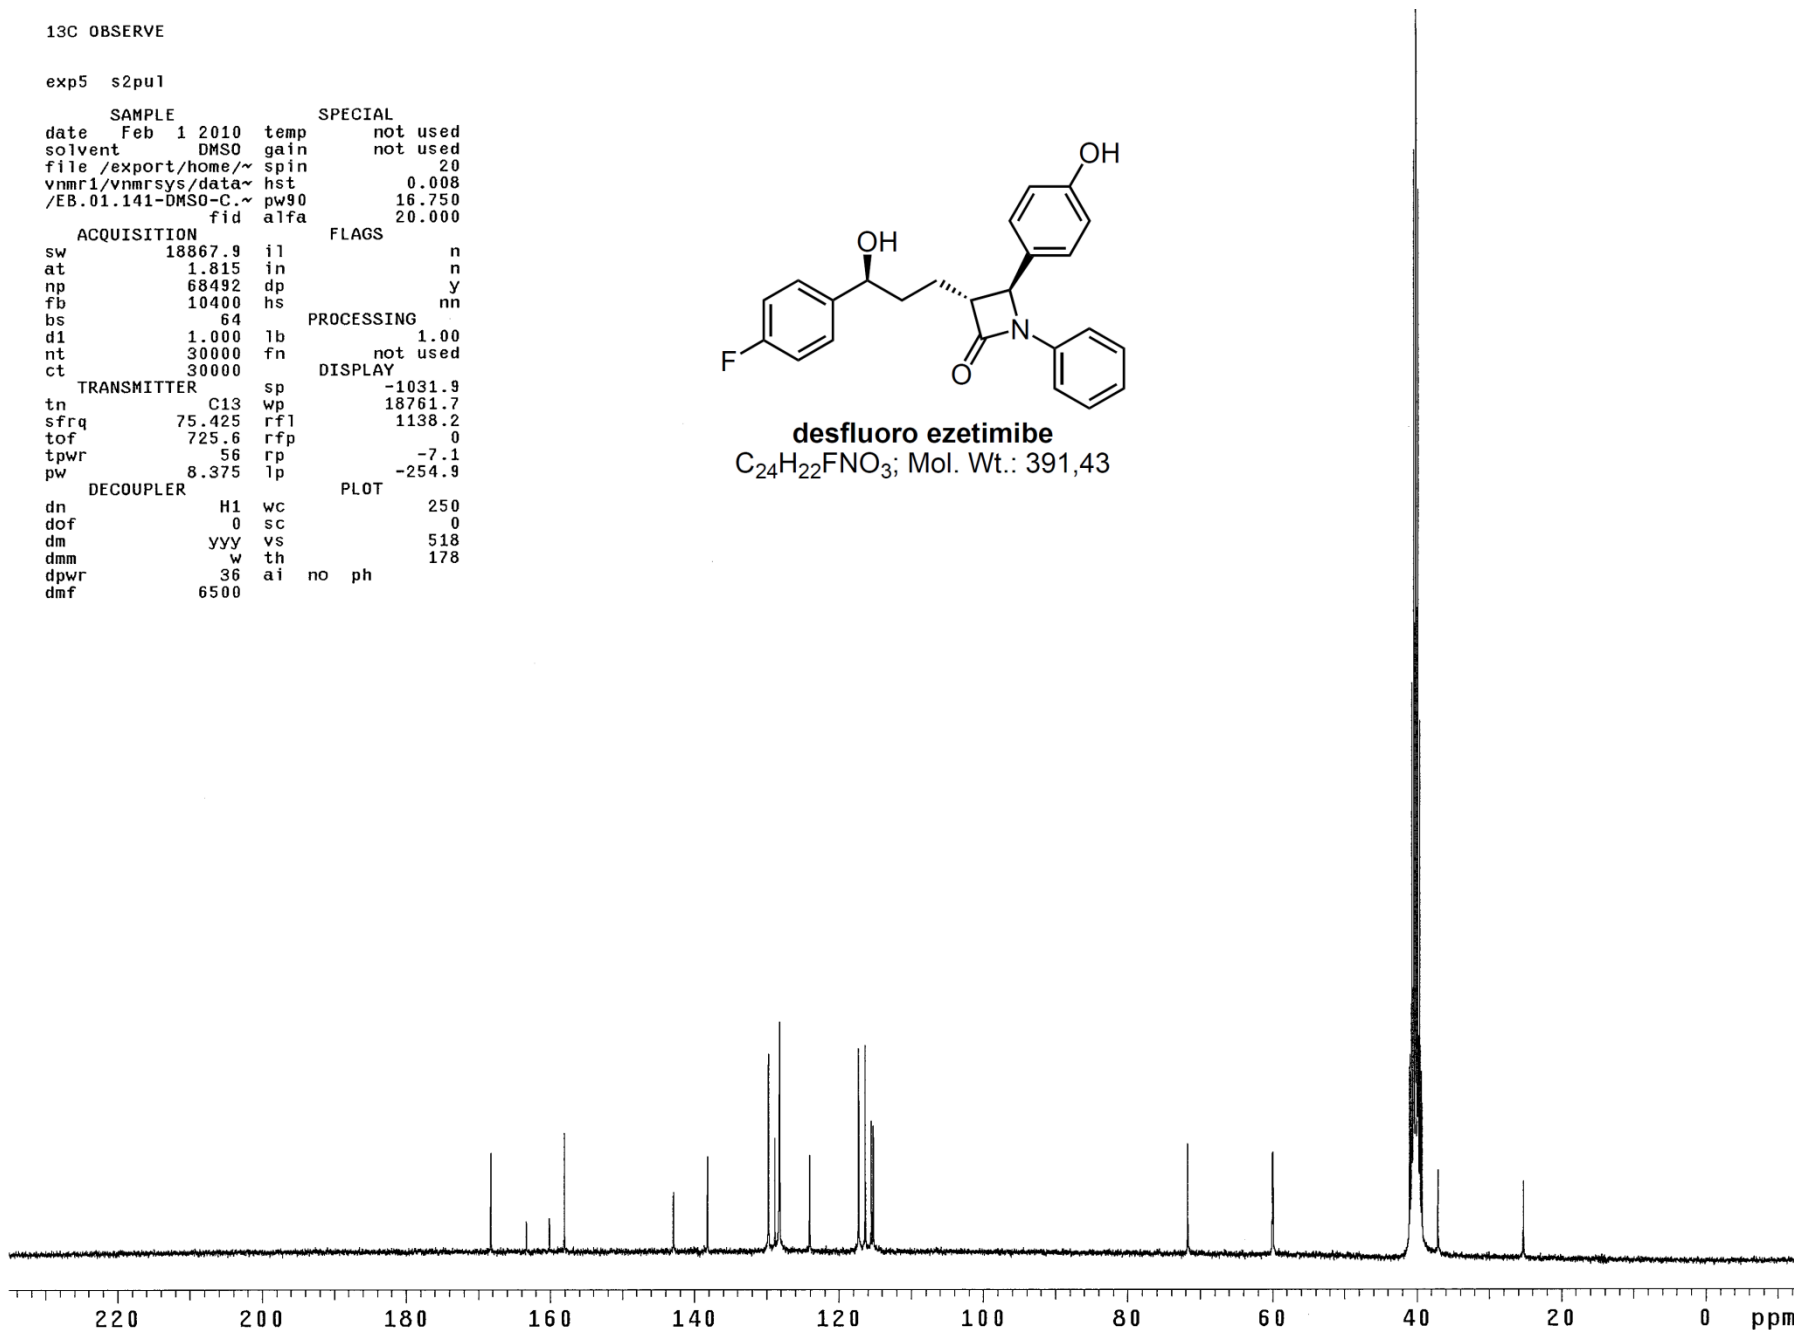



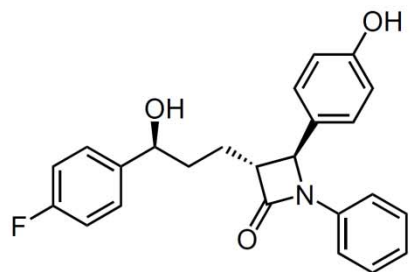

**desfluoro ezetimibe**  
 $C_{24}H_{22}FNO_3$ ; Mol. Wt.: 391,43

CH3 carbons

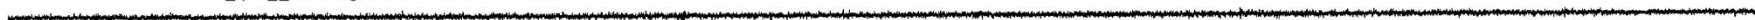

CH2 carbons

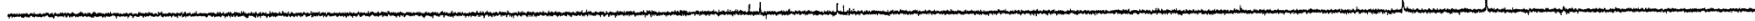

CH carbons

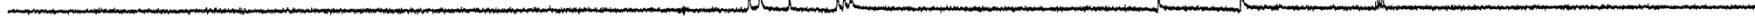

all protonated carbons

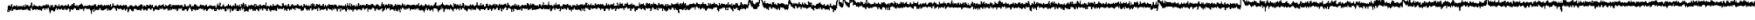

220 200 180 160 140 120 100 80 60 40 20 0 ppm

EB\_01\_141

Sample Name:  
EB\_01\_141  
Data Collected on:  
Varian-NMR-mercury300  
Archive directory:  
/home/vnmr1/vnmrsys/data/Esen  
Sample directory:  
EB\_01\_141\_20140828\_01  
FidFile: FLUORINE

Pulse Sequence: FLUORINE (s2pul)  
Solvent: dms0  
Data collected on: Aug 28 2014

Temp. 24.4 C / 297.6 K  
Operator: Esen

Relax. delay 1.000 sec  
Pulse 30.0 degrees  
Acq. time 0.984 sec  
Width 16949.2 Hz  
1472 repetitions  
OBSERVE F19, 282.2119105 MHz  
DATA PROCESSING  
FT size 262144  
Total time 2 hr, 22 min

-116.375  
-116.395  
-116.408  
-116.415  
-116.427  
-116.440  
-116.447  
-116.459  
-116.479

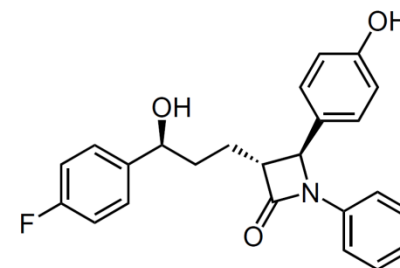

**desfluoro ezetimibe**  
C<sub>24</sub>H<sub>22</sub>FNO<sub>3</sub>; Mol. Wt.: 391,43

-85 -90 -95 -100 -105 -110 -115 -120 -125 -130 -135 ppm

EB01141

EB01141 1 (1.019)

Scan ES+  
2.25e8

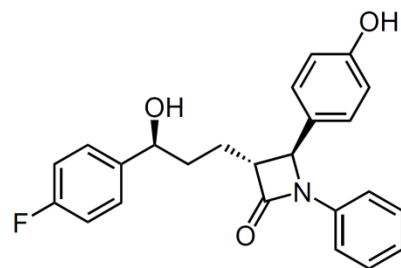

**desfluoro ezetimibe**  
C<sub>24</sub>H<sub>22</sub>FNO<sub>3</sub>; Mol. Wt.: 391,43

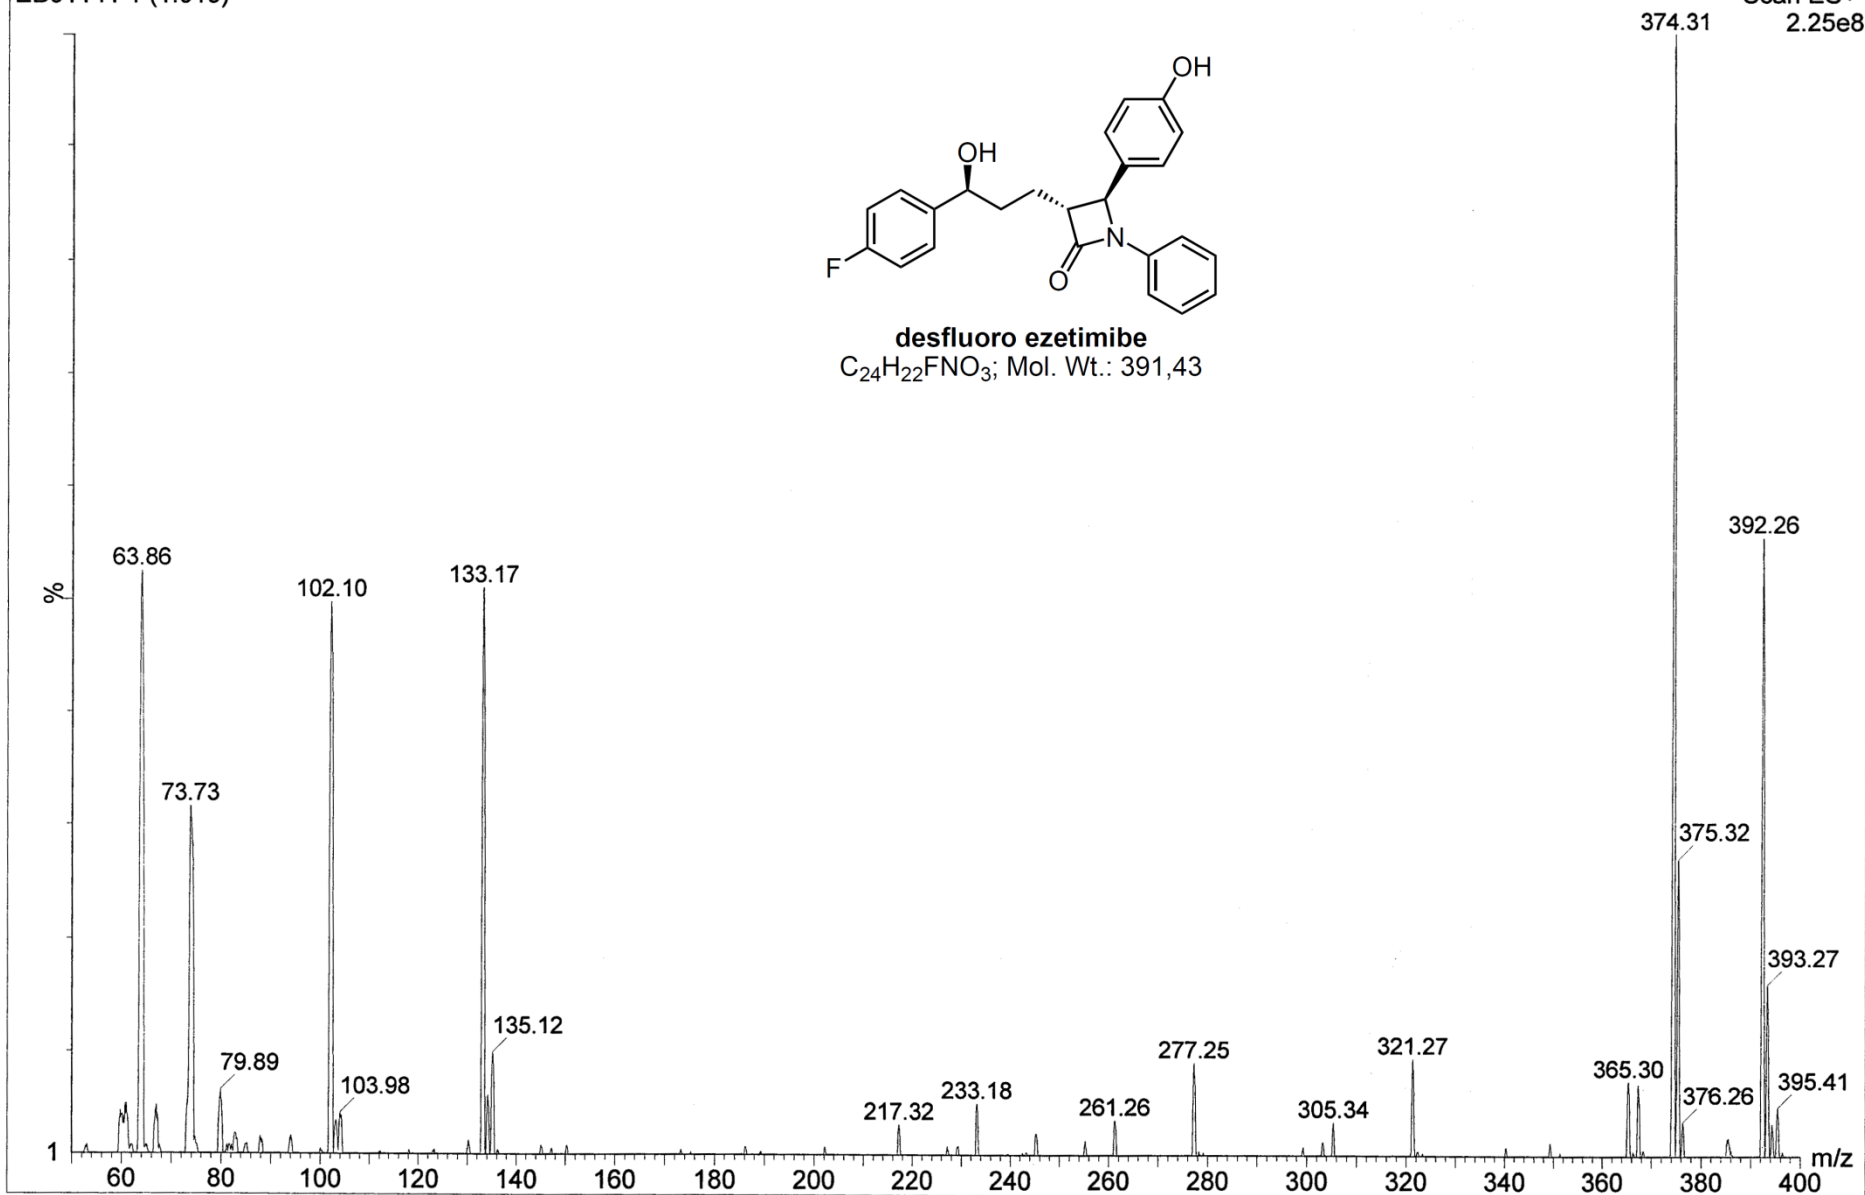

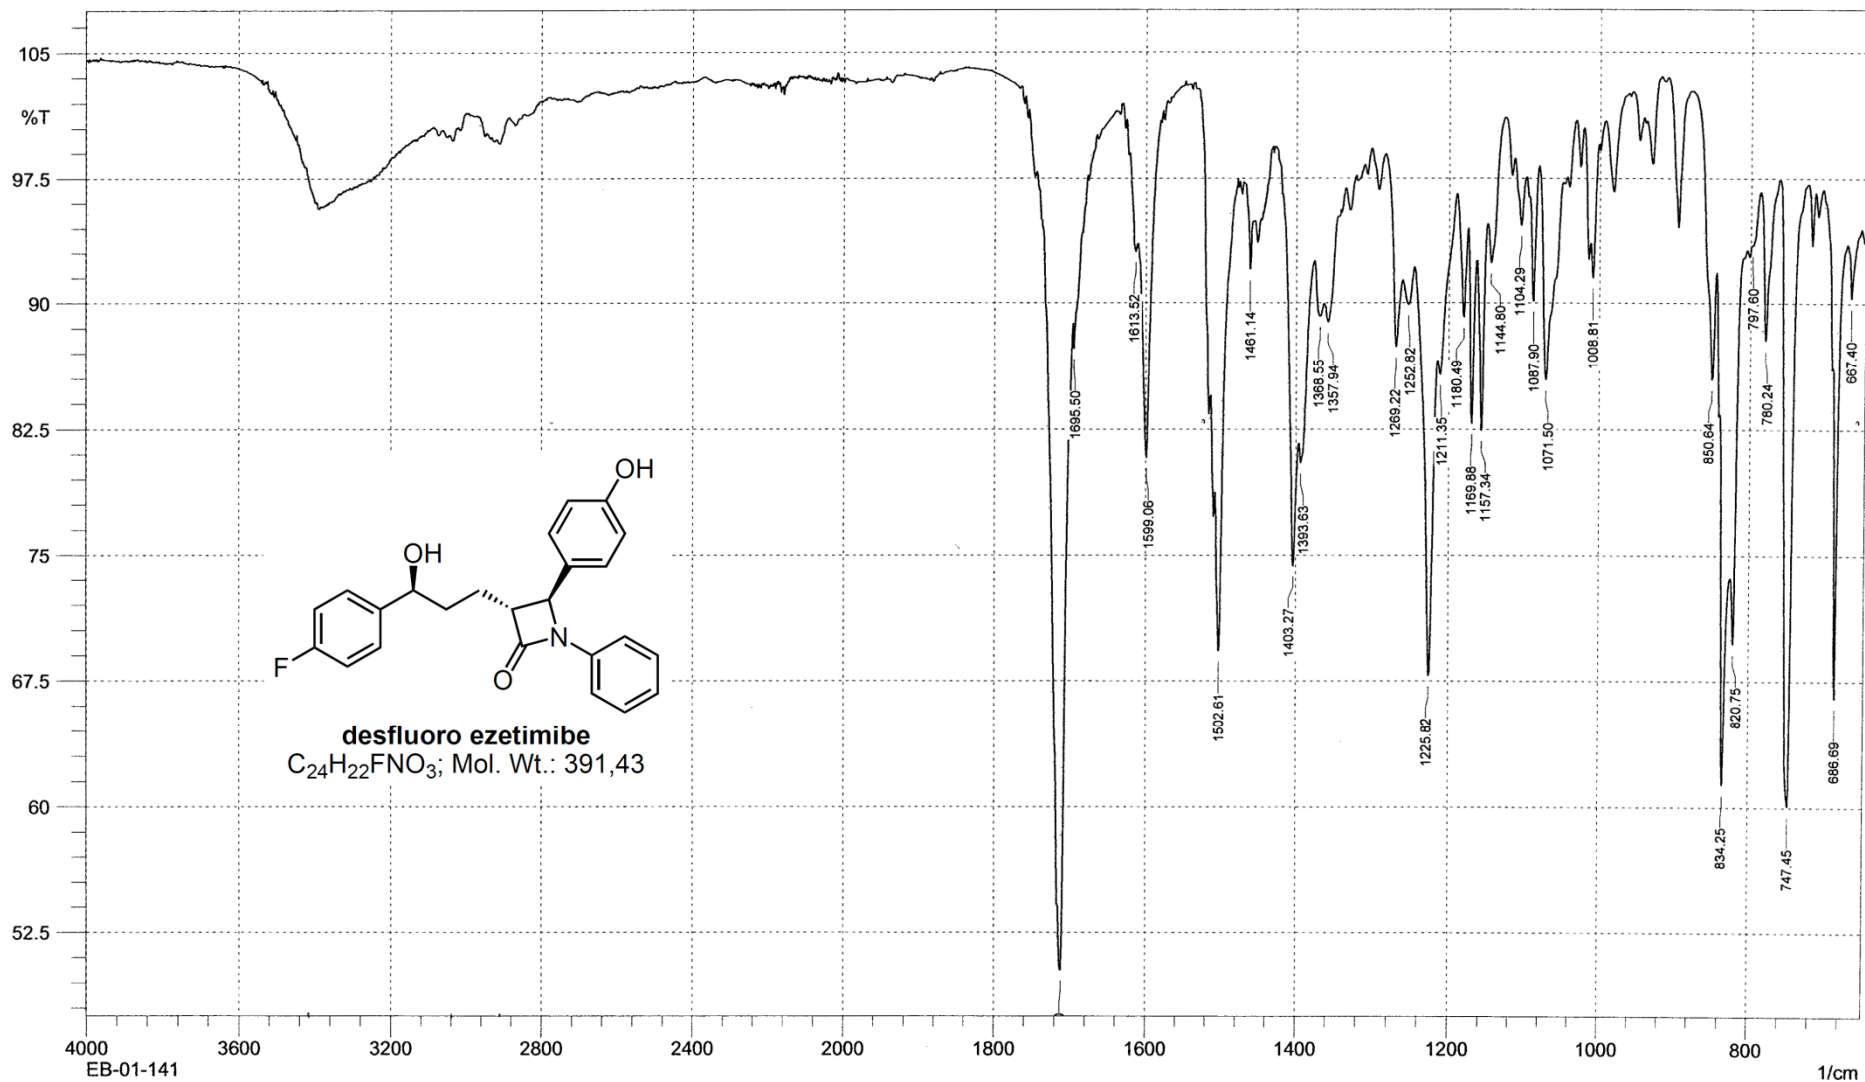

# $^1\text{H}$ NMR

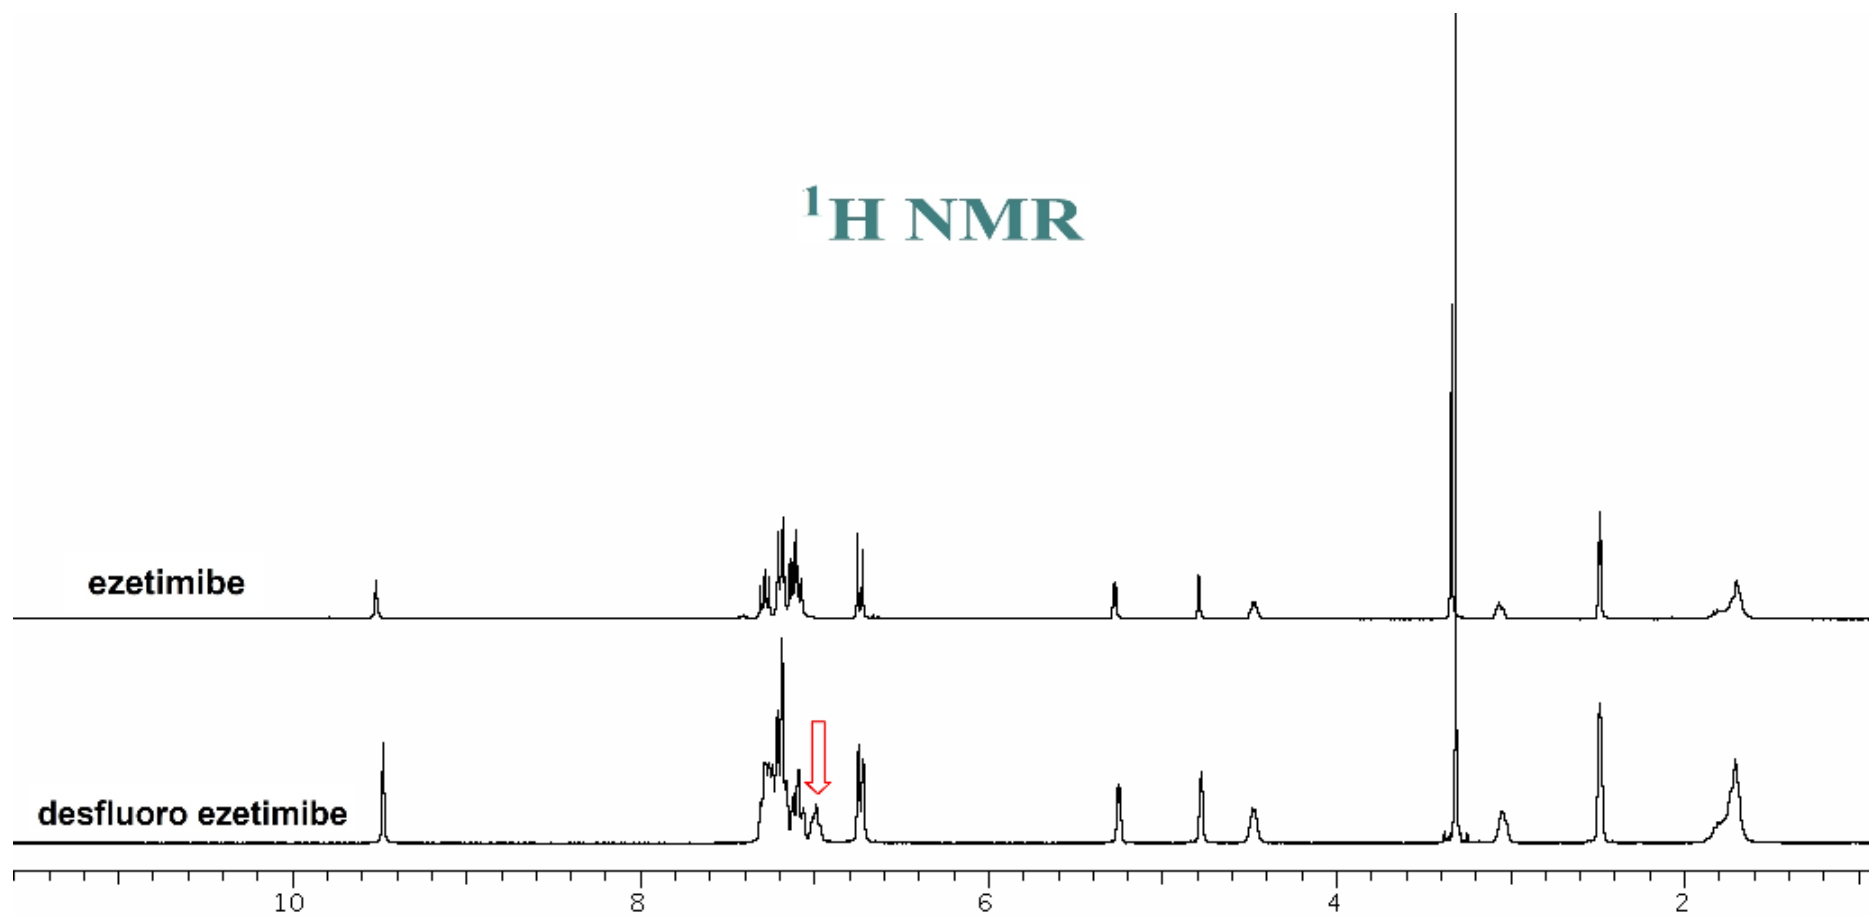

# $^{13}\text{C}$ NMR

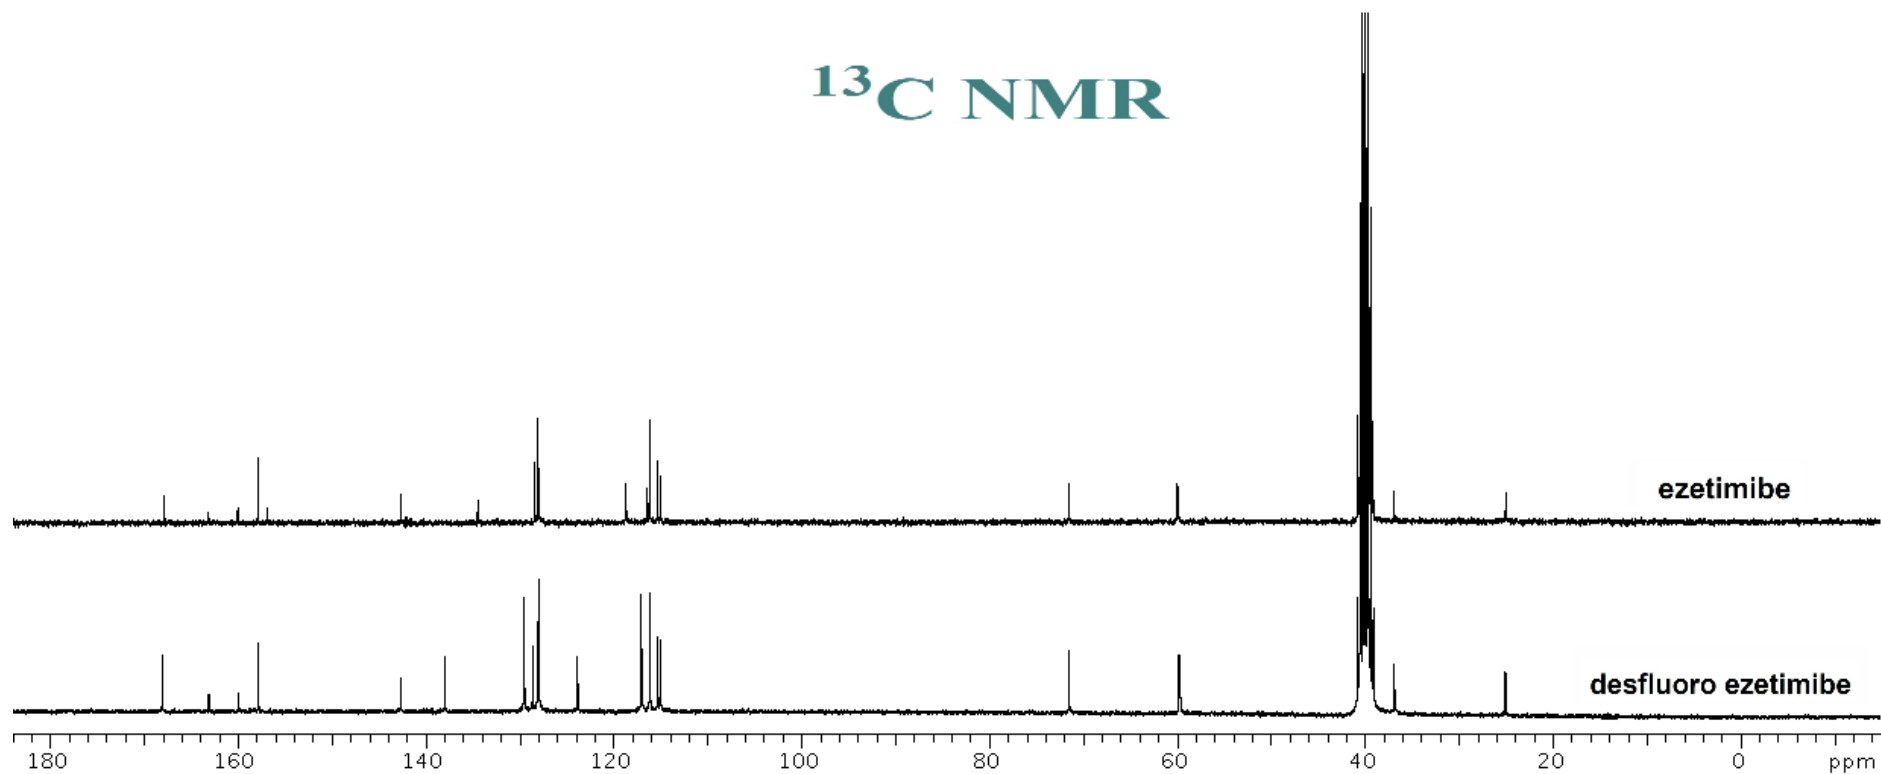

# $^{19}\text{F}$ NMR

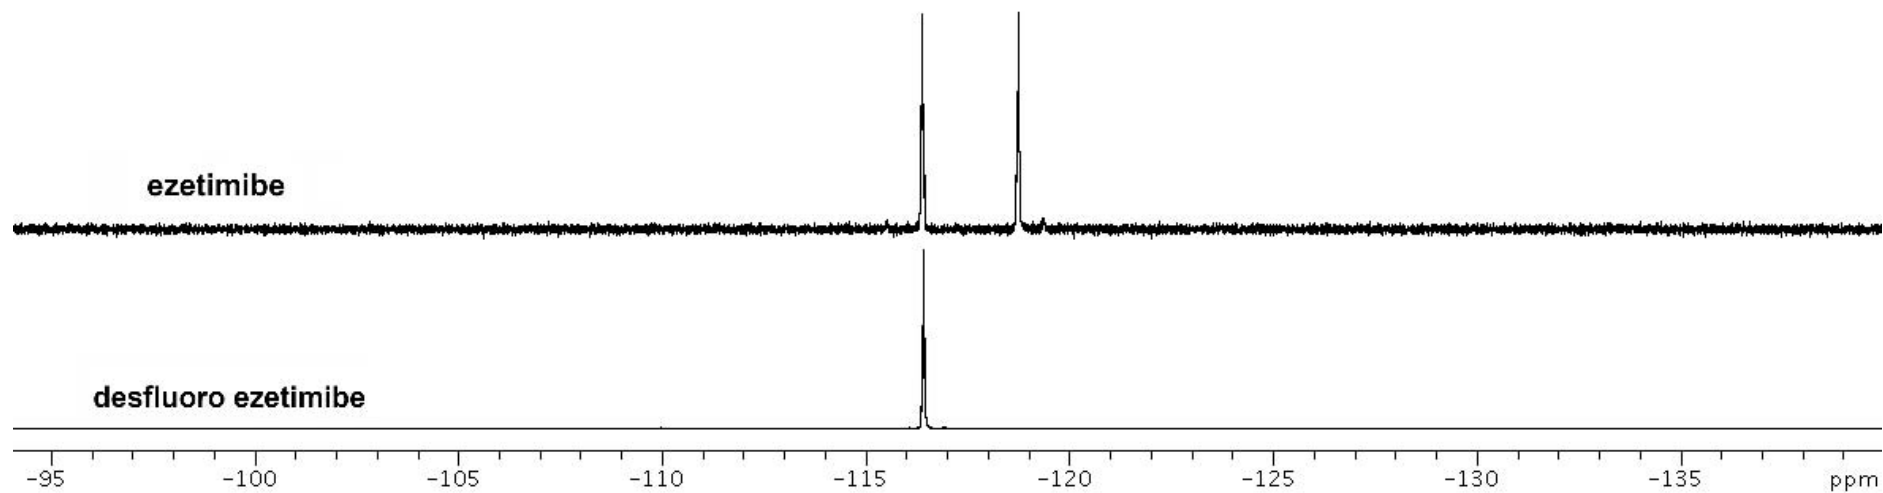

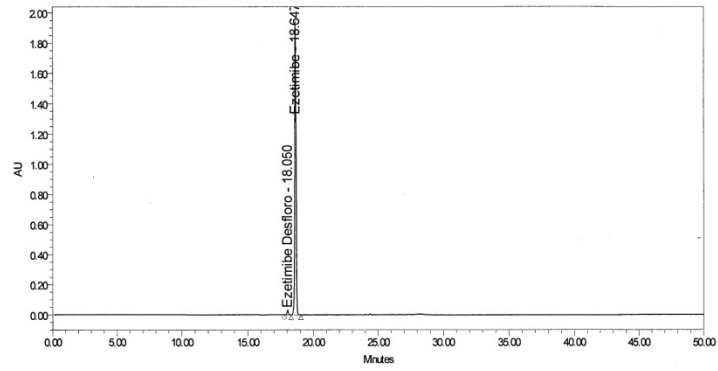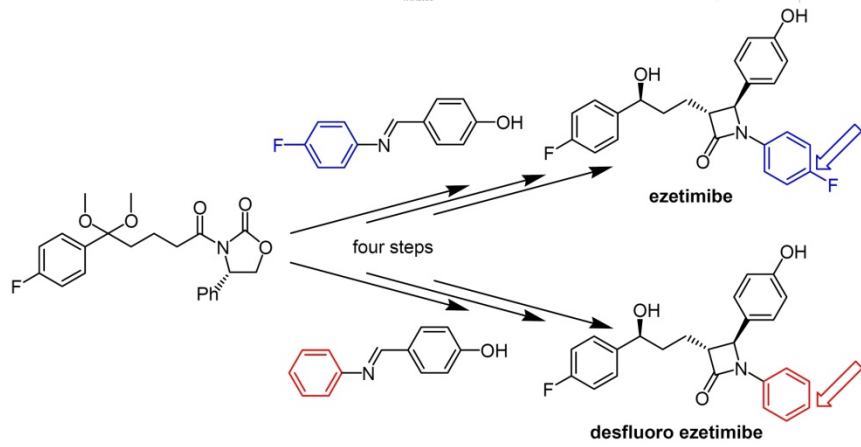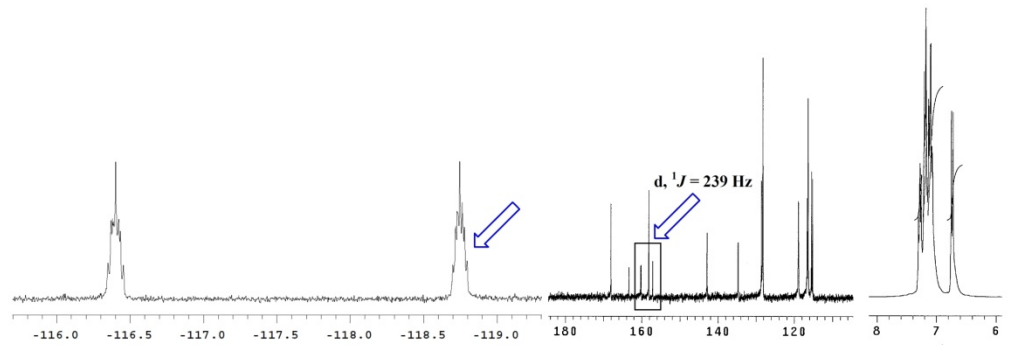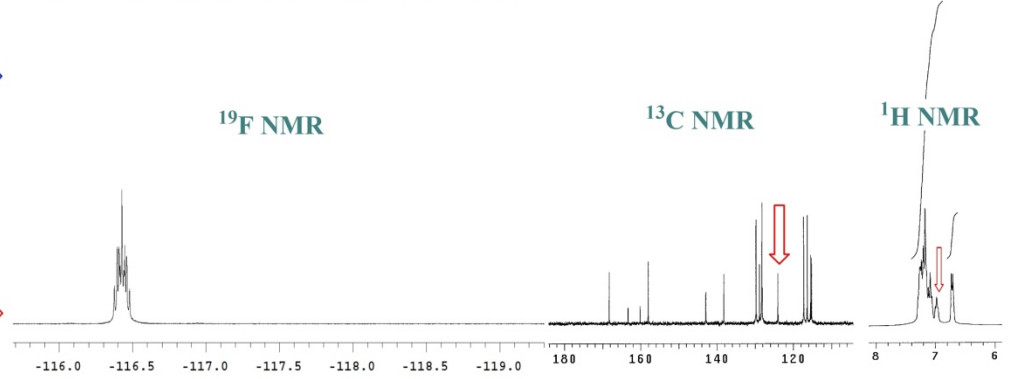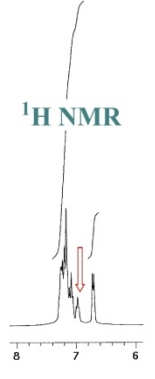



SAMPLE INFORMATION

|                                           |              |                     |                        |
|-------------------------------------------|--------------|---------------------|------------------------|
| Sample Name:                              | Eze-5        | Acquired By:        | System                 |
| Sample Type:                              | Unknown      | Sample Set Name:    | EZE 22 23 24 DESFLORO  |
| Vial:                                     | 1:A,2        | Acq. Method Set:    | EZETIMIBE EZE_22       |
| Injection #:                              | 1            | Processing Method:  | desF Eze intermediates |
| Injection Volume:                         | 2.00 ul      | Channel Name:       | ACQUITY TUV ChA        |
| Run Time:                                 | 33.0 Minutes | Proc. Chnl. Descr.: | ACQUITY TUV ChA 220nm  |
| Date Acquired: 8/14/2014 4:52:38 PM EEST  |              |                     |                        |
| Date Processed: 8/15/2014 8:34:16 AM EEST |              |                     |                        |

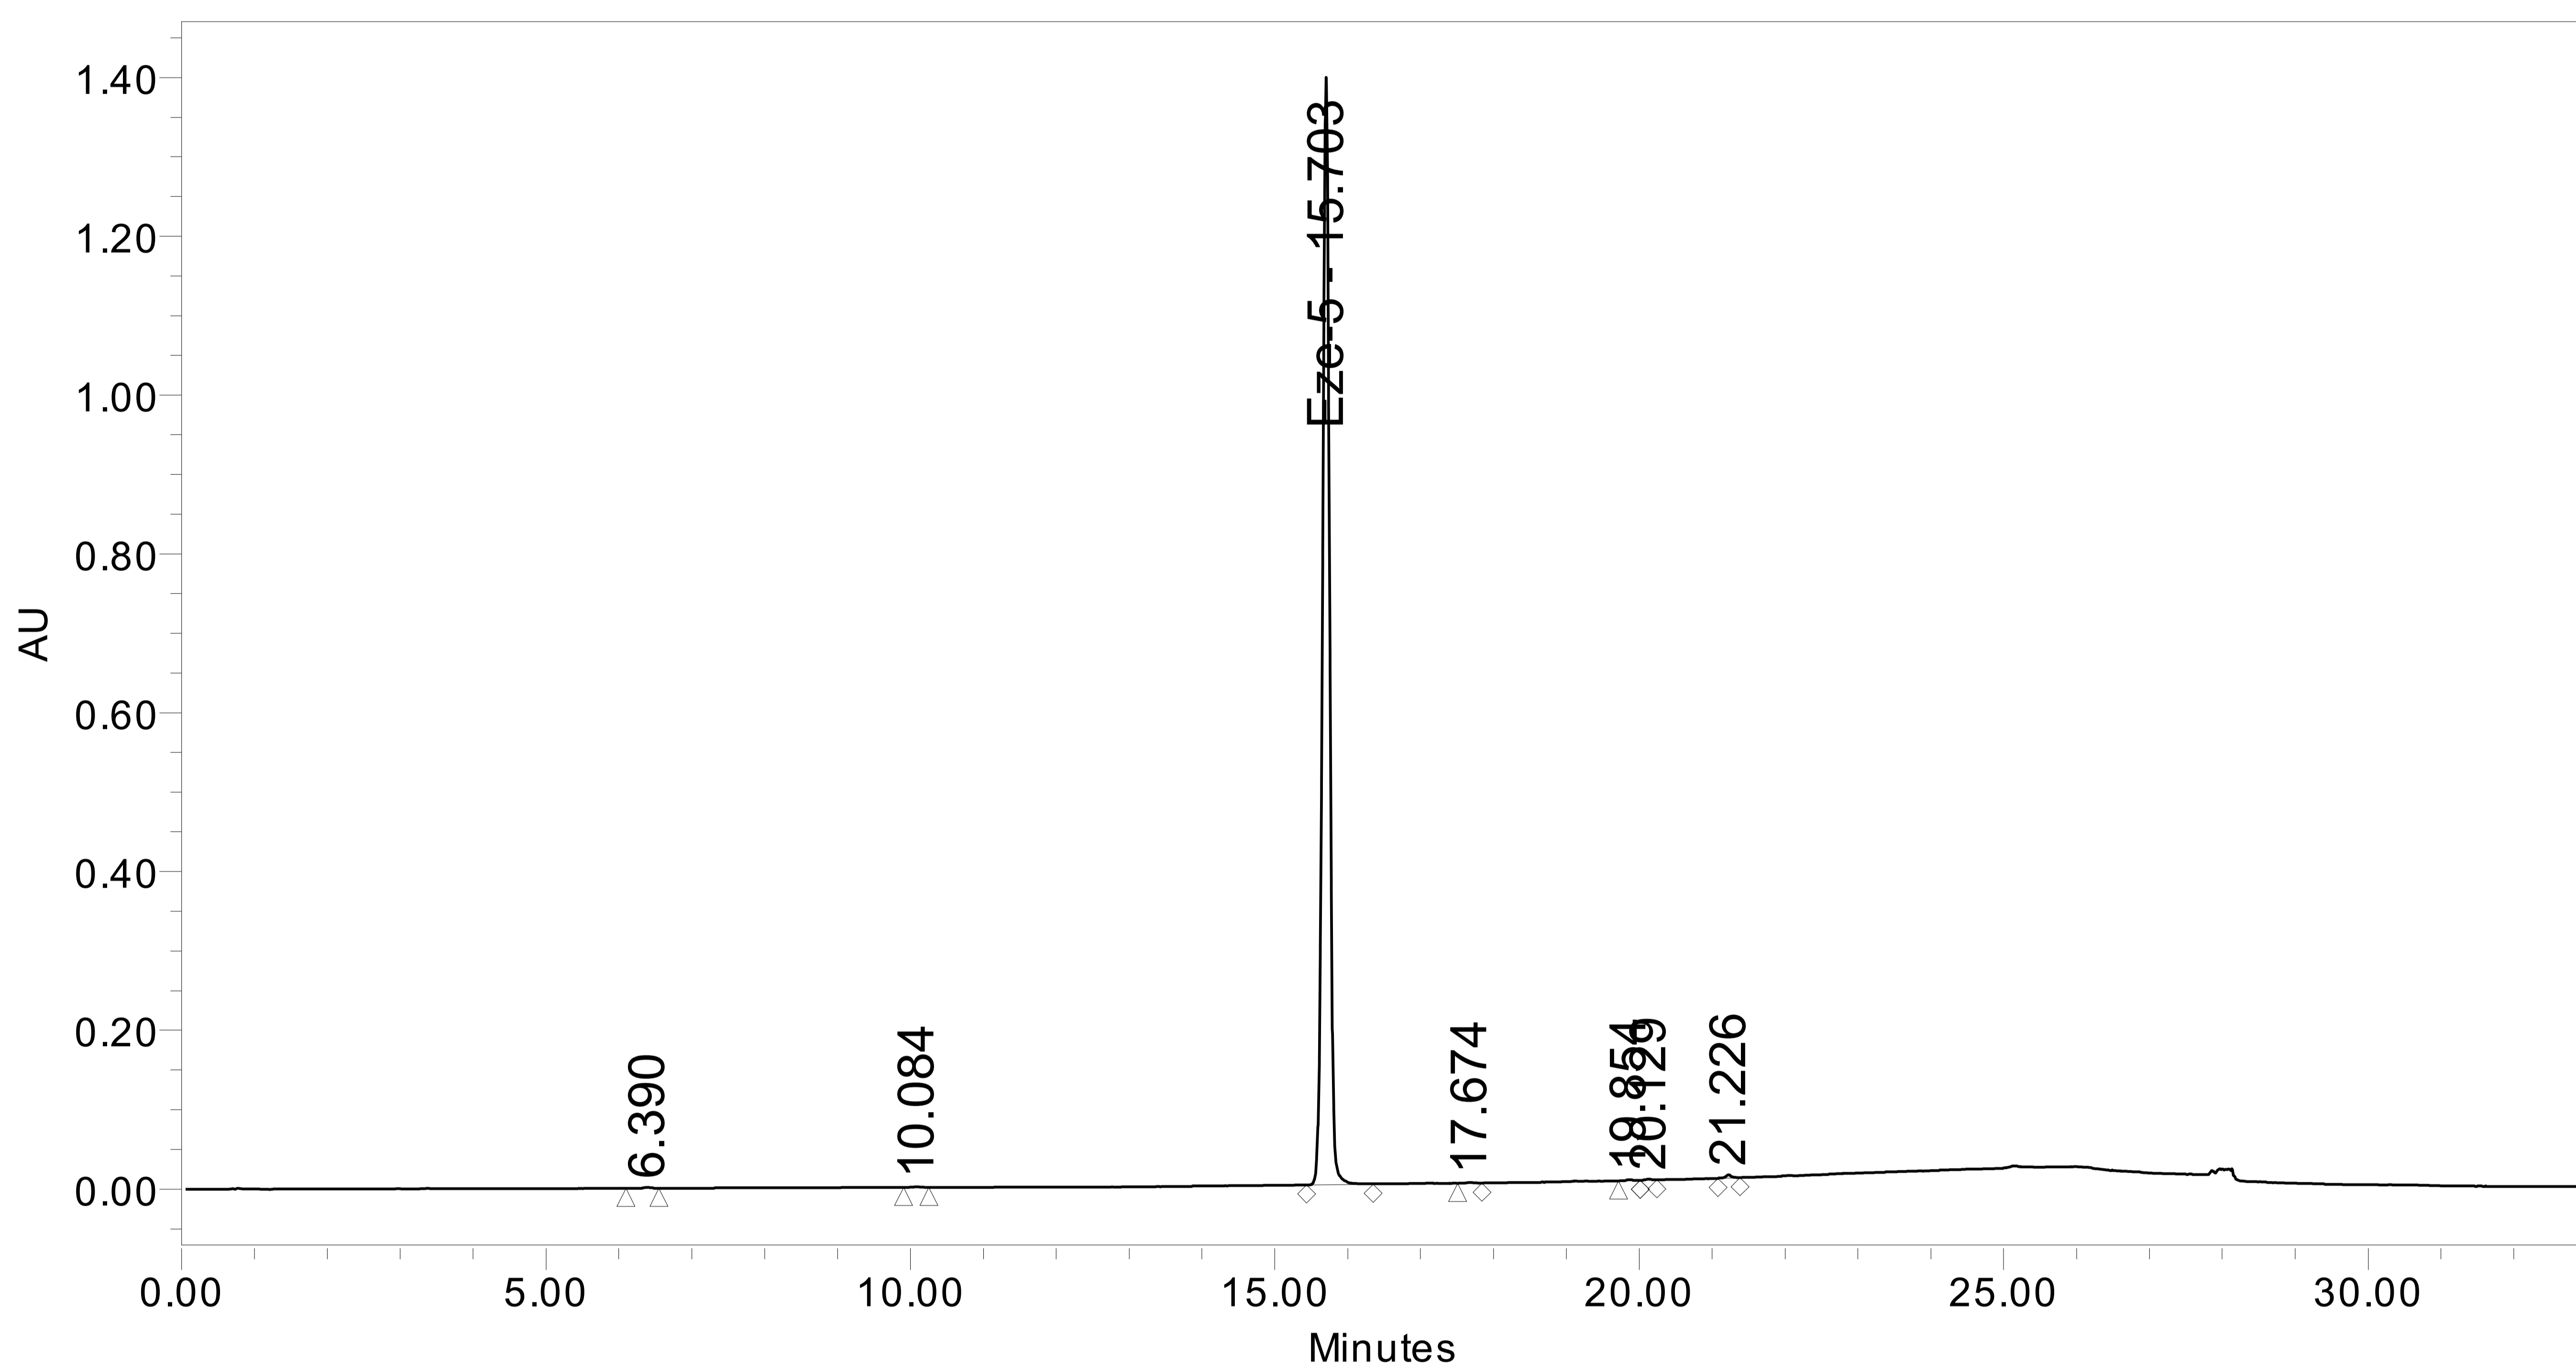

|   | Peak Name  | RT     | Area    | % Area | Height  |
|---|------------|--------|---------|--------|---------|
| 1 |            | 6.390  | 6263    | 0.07   | 836     |
| 2 |            | 10.084 | 7173    | 0.08   | 876     |
| 3 | Eze-5      | 15.703 | 9384444 | 99.35  | 1394752 |
| 4 | desF Eze-5 | 15.952 |         |        |         |
| 5 |            | 17.674 | 8779    | 0.09   | 1117    |
| 6 |            | 19.854 | 7717    | 0.08   | 1029    |
| 7 |            | 20.129 | 7359    | 0.08   | 1148    |
| 8 |            | 21.226 | 23832   | 0.25   | 4157    |

SAMPLE INFORMATION

|                                           |              |                     |                        |
|-------------------------------------------|--------------|---------------------|------------------------|
| Sample Name:                              | desF Eze-5   | Acquired By:        | System                 |
| Sample Type:                              | Unknown      | Sample Set Name:    | EZE 22 23 24 DESFLORO  |
| Vial:                                     | 1:A,3        | Acq. Method Set:    | EZETIMIBE EZE_22       |
| Injection #:                              | 1            | Processing Method:  | desF Eze intermediates |
| Injection Volume:                         | 2.00 ul      | Channel Name:       | ACQUITY TUV ChA        |
| Run Time:                                 | 33.0 Minutes | Proc. Chnl. Descr.: | ACQUITY TUV ChA 220nm  |
| Date Acquired: 8/14/2014 5:26:52 PM EEST  |              |                     |                        |
| Date Processed: 8/15/2014 8:30:32 AM EEST |              |                     |                        |

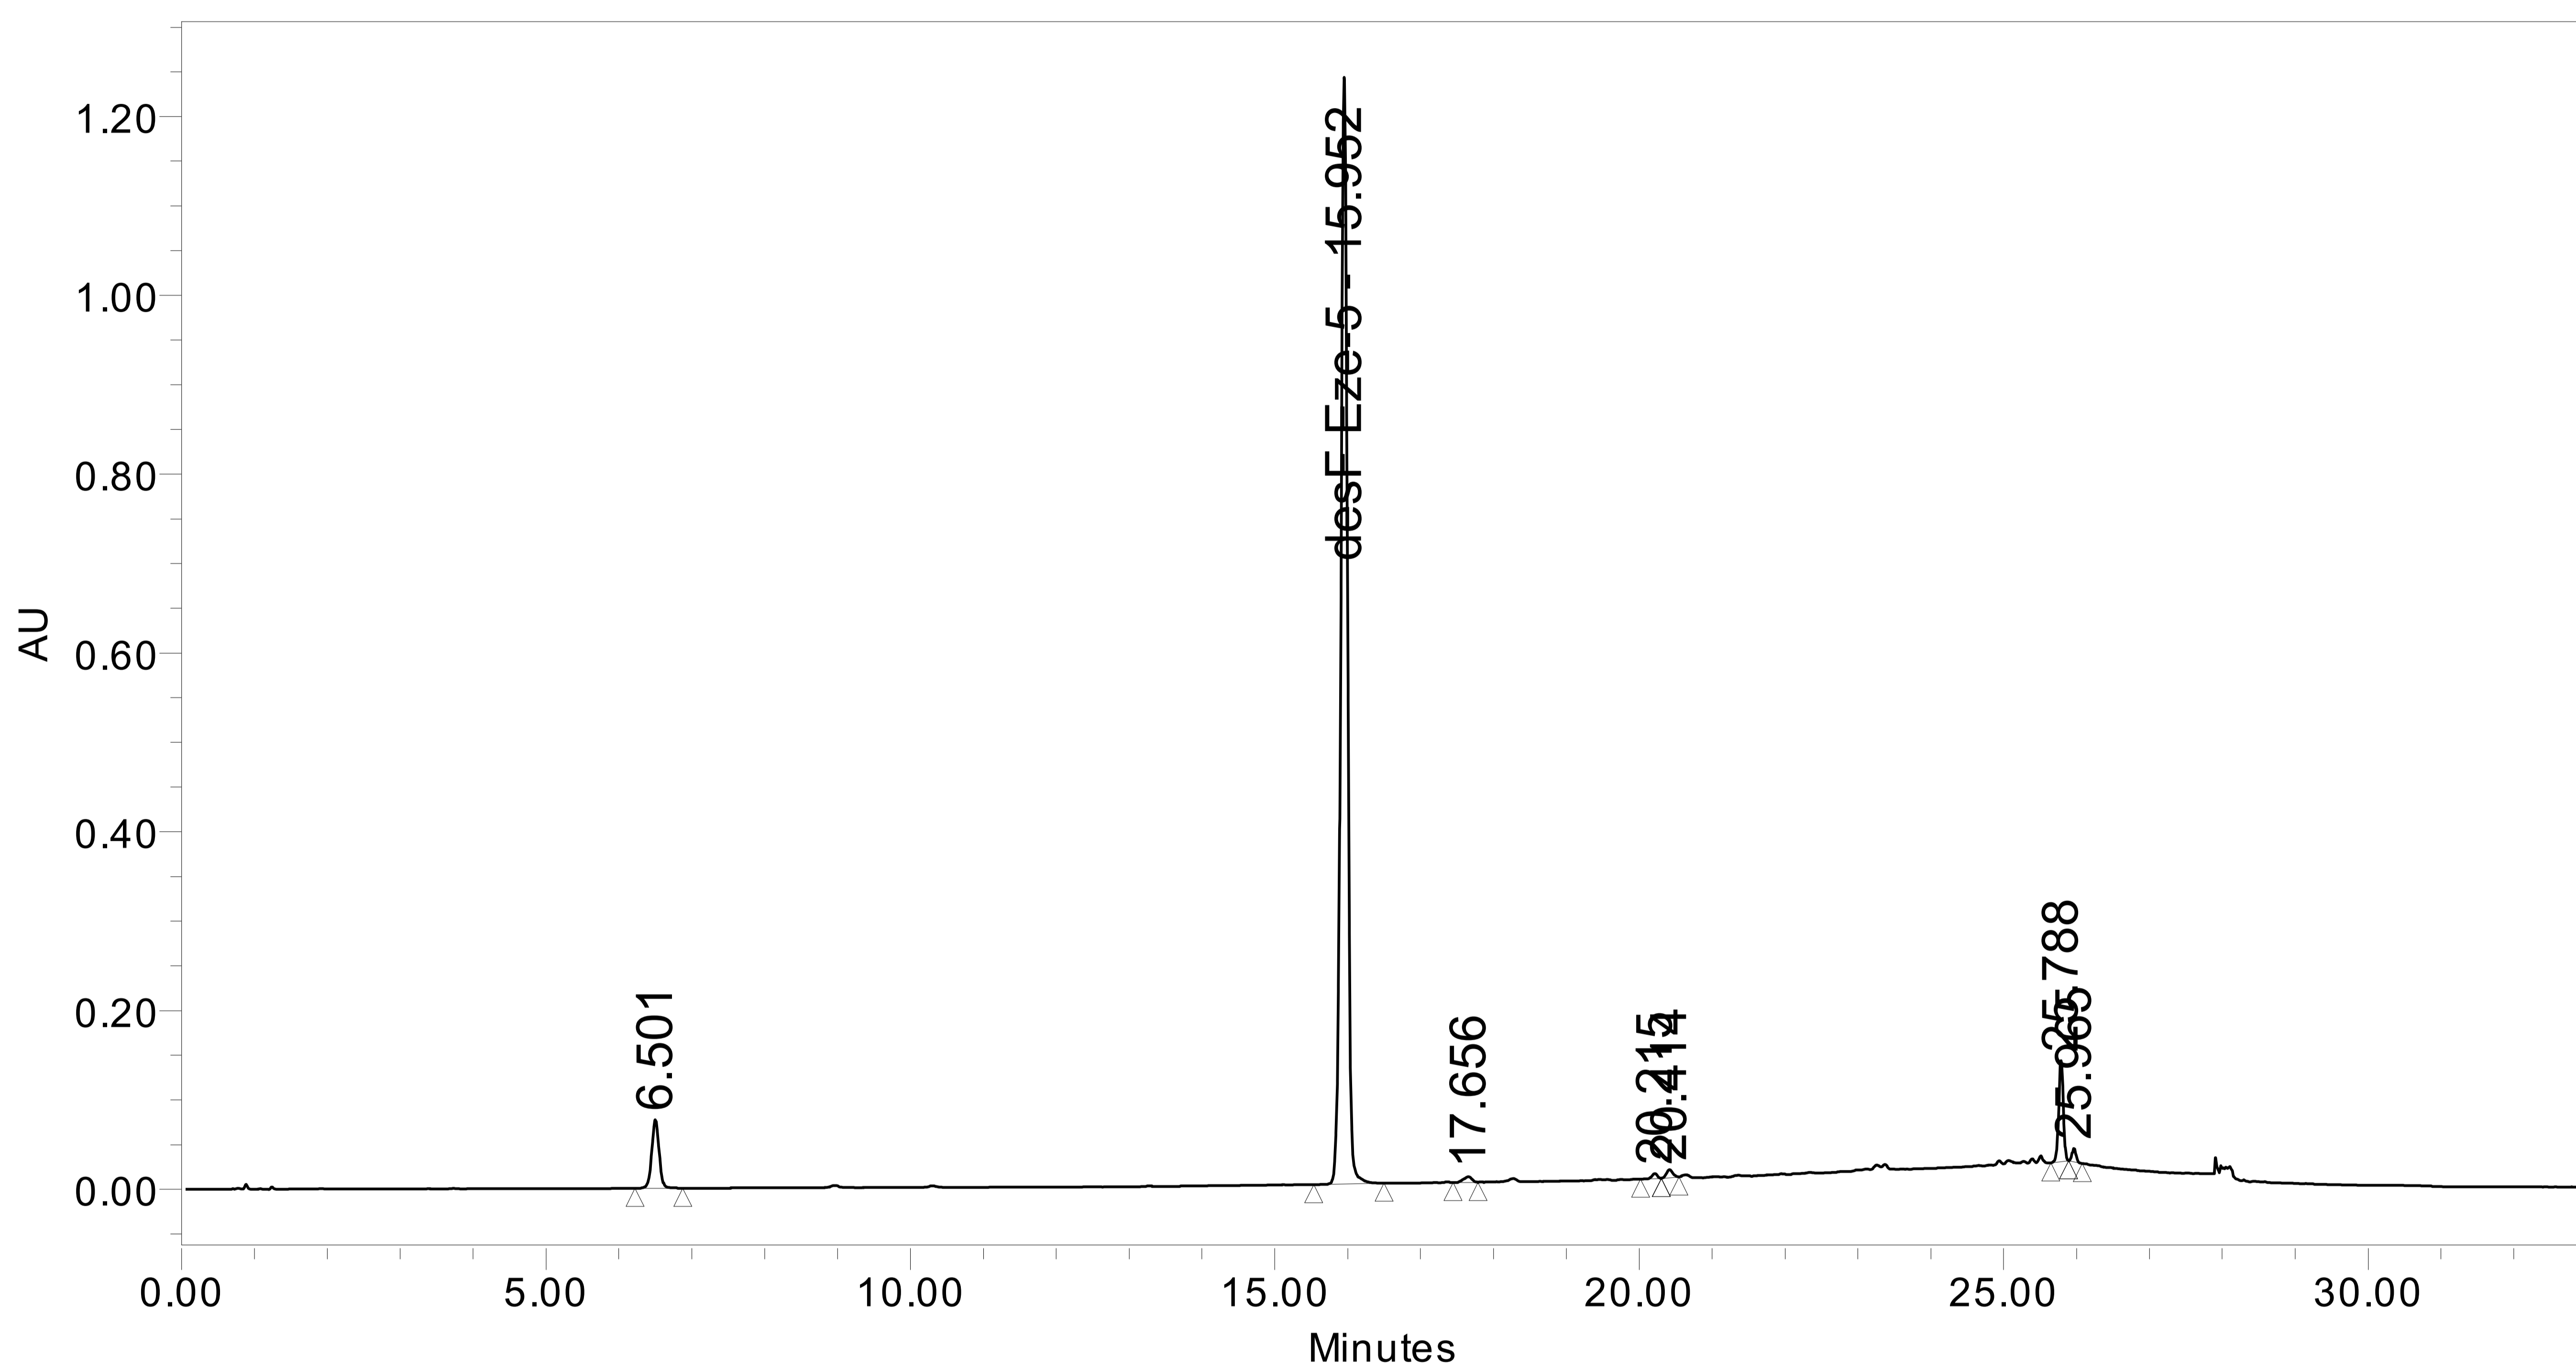

|   | Peak Name  | RT     | Area    | % Area | Height  |
|---|------------|--------|---------|--------|---------|
| 1 |            | 6.501  | 538109  | 5.86   | 76405   |
| 2 | Eze-5      | 15.586 |         |        |         |
| 3 | desF Eze-5 | 15.952 | 7963161 | 86.78  | 1237925 |
| 4 |            | 17.656 | 50954   | 0.56   | 6266    |
| 5 |            | 20.215 | 29082   | 0.32   | 5523    |
| 6 |            | 20.414 | 53270   | 0.58   | 8857    |
| 7 |            | 25.788 | 485090  | 5.29   | 112724  |
| 8 |            | 25.965 | 56820   | 0.62   | 15109   |



SAMPLE INFORMATION

|                   |                           |                     |                        |
|-------------------|---------------------------|---------------------|------------------------|
| Sample Name:      | Eze-5+desF Eze-5          | Acquired By:        | System                 |
| Sample Type:      | Unknown                   | Sample Set Name:    | EZE 22 23 24 DESFLORO  |
| Vial:             | 1:A,4                     | Acq. Method Set:    | EZETIMIBE EZE_22       |
| Injection #:      | 1                         | Processing Method:  | desF Eze intermediates |
| Injection Volume: | 2.00 ul                   | Channel Name:       | ACQUITY TUV ChA        |
| Run Time:         | 33.0 Minutes              | Proc. Chnl. Descr.: | ACQUITY TUV ChA 220nm  |
| Date Acquired:    | 8/14/2014 6:01:04 PM EEST |                     |                        |
| Date Processed:   | 8/15/2014 8:32:39 AM EEST |                     |                        |

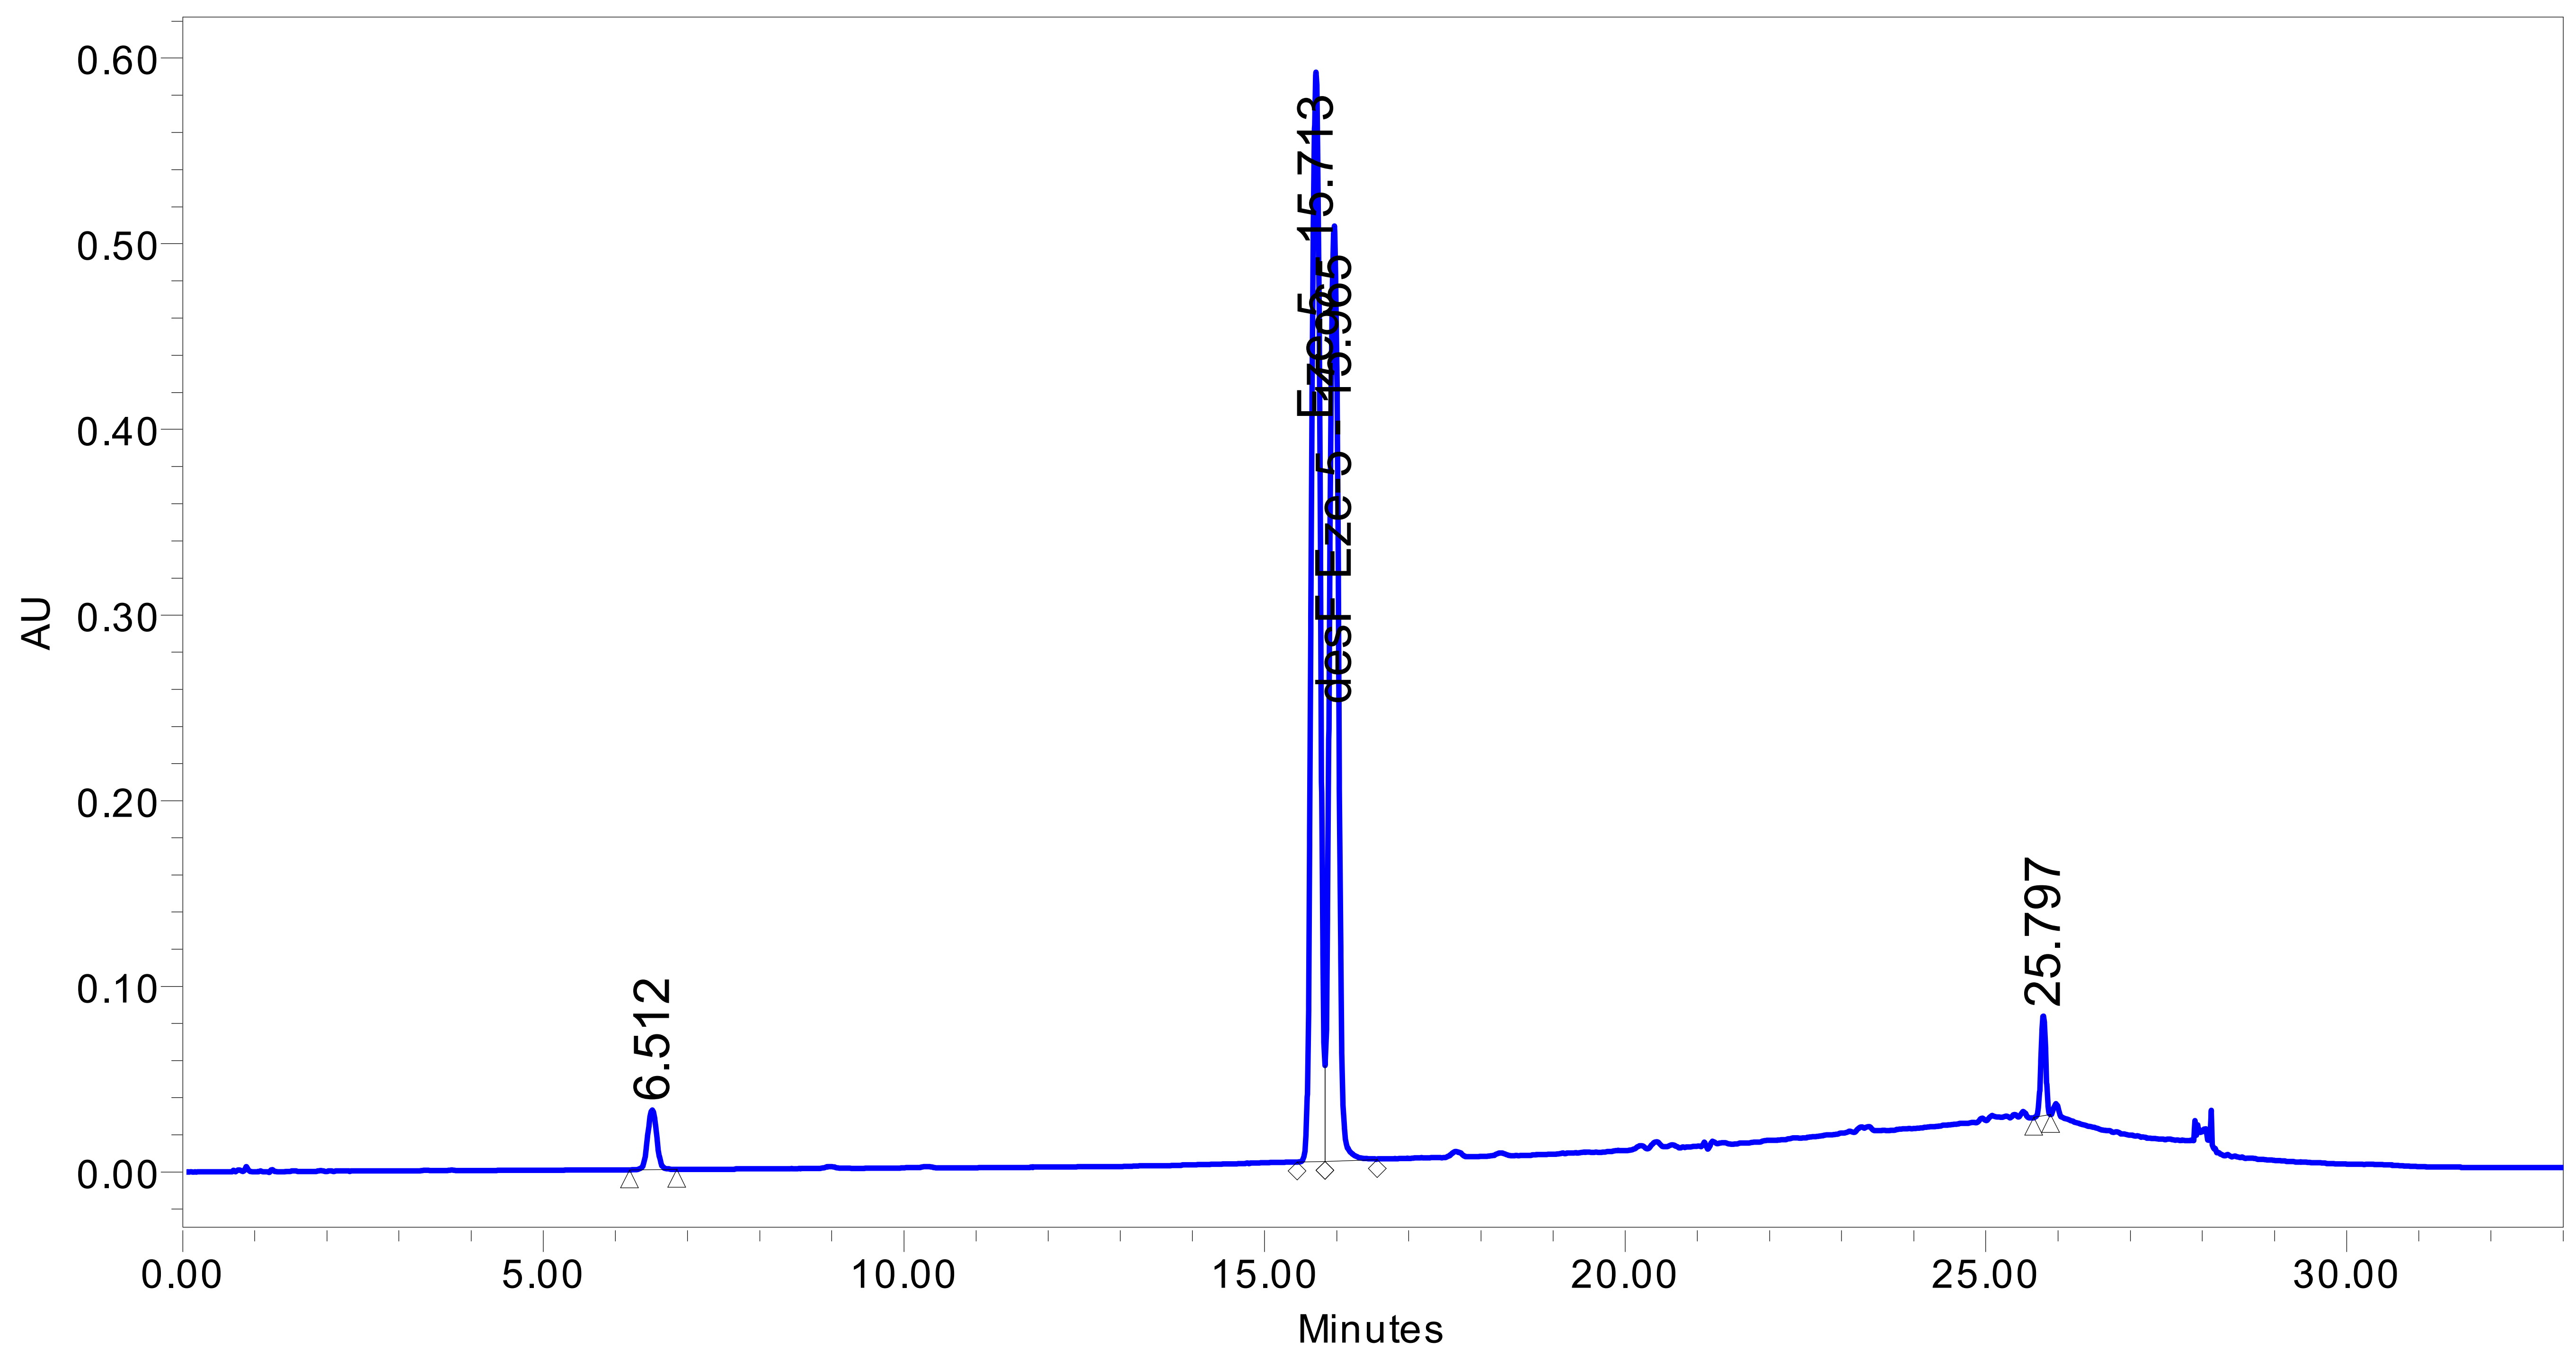

|   | Peak Name  | RT     | Area    | % Area | Height |
|---|------------|--------|---------|--------|--------|
| 1 |            | 6.512  | 282633  | 2.89   | 32216  |
| 2 | Eze-5      | 15.713 | 4906302 | 50.23  | 586872 |
| 3 | desF Eze-5 | 15.965 | 4323114 | 44.26  | 503542 |
| 4 |            | 25.797 | 255495  | 2.62   | 53777  |

SAMPLE INFORMATION

|                                           |              |                     |                        |
|-------------------------------------------|--------------|---------------------|------------------------|
| Sample Name:                              | Eze-6        | Acquired By:        | System                 |
| Sample Type:                              | Unknown      | Sample Set Name:    | EZE 22 23 24 DESFLORO  |
| Vial:                                     | 1:A,5        | Acq. Method Set:    | EZETIMIBE EZE_22       |
| Injection #:                              | 1            | Processing Method:  | desF Eze intermediates |
| Injection Volume:                         | 2.00 ul      | Channel Name:       | ACQUITY TUV ChA        |
| Run Time:                                 | 33.0 Minutes | Proc. Chnl. Descr.: | ACQUITY TUV ChA 220nm  |
| Date Acquired: 8/14/2014 7:09:28 PM EEST  |              |                     |                        |
| Date Processed: 8/15/2014 8:38:13 AM EEST |              |                     |                        |

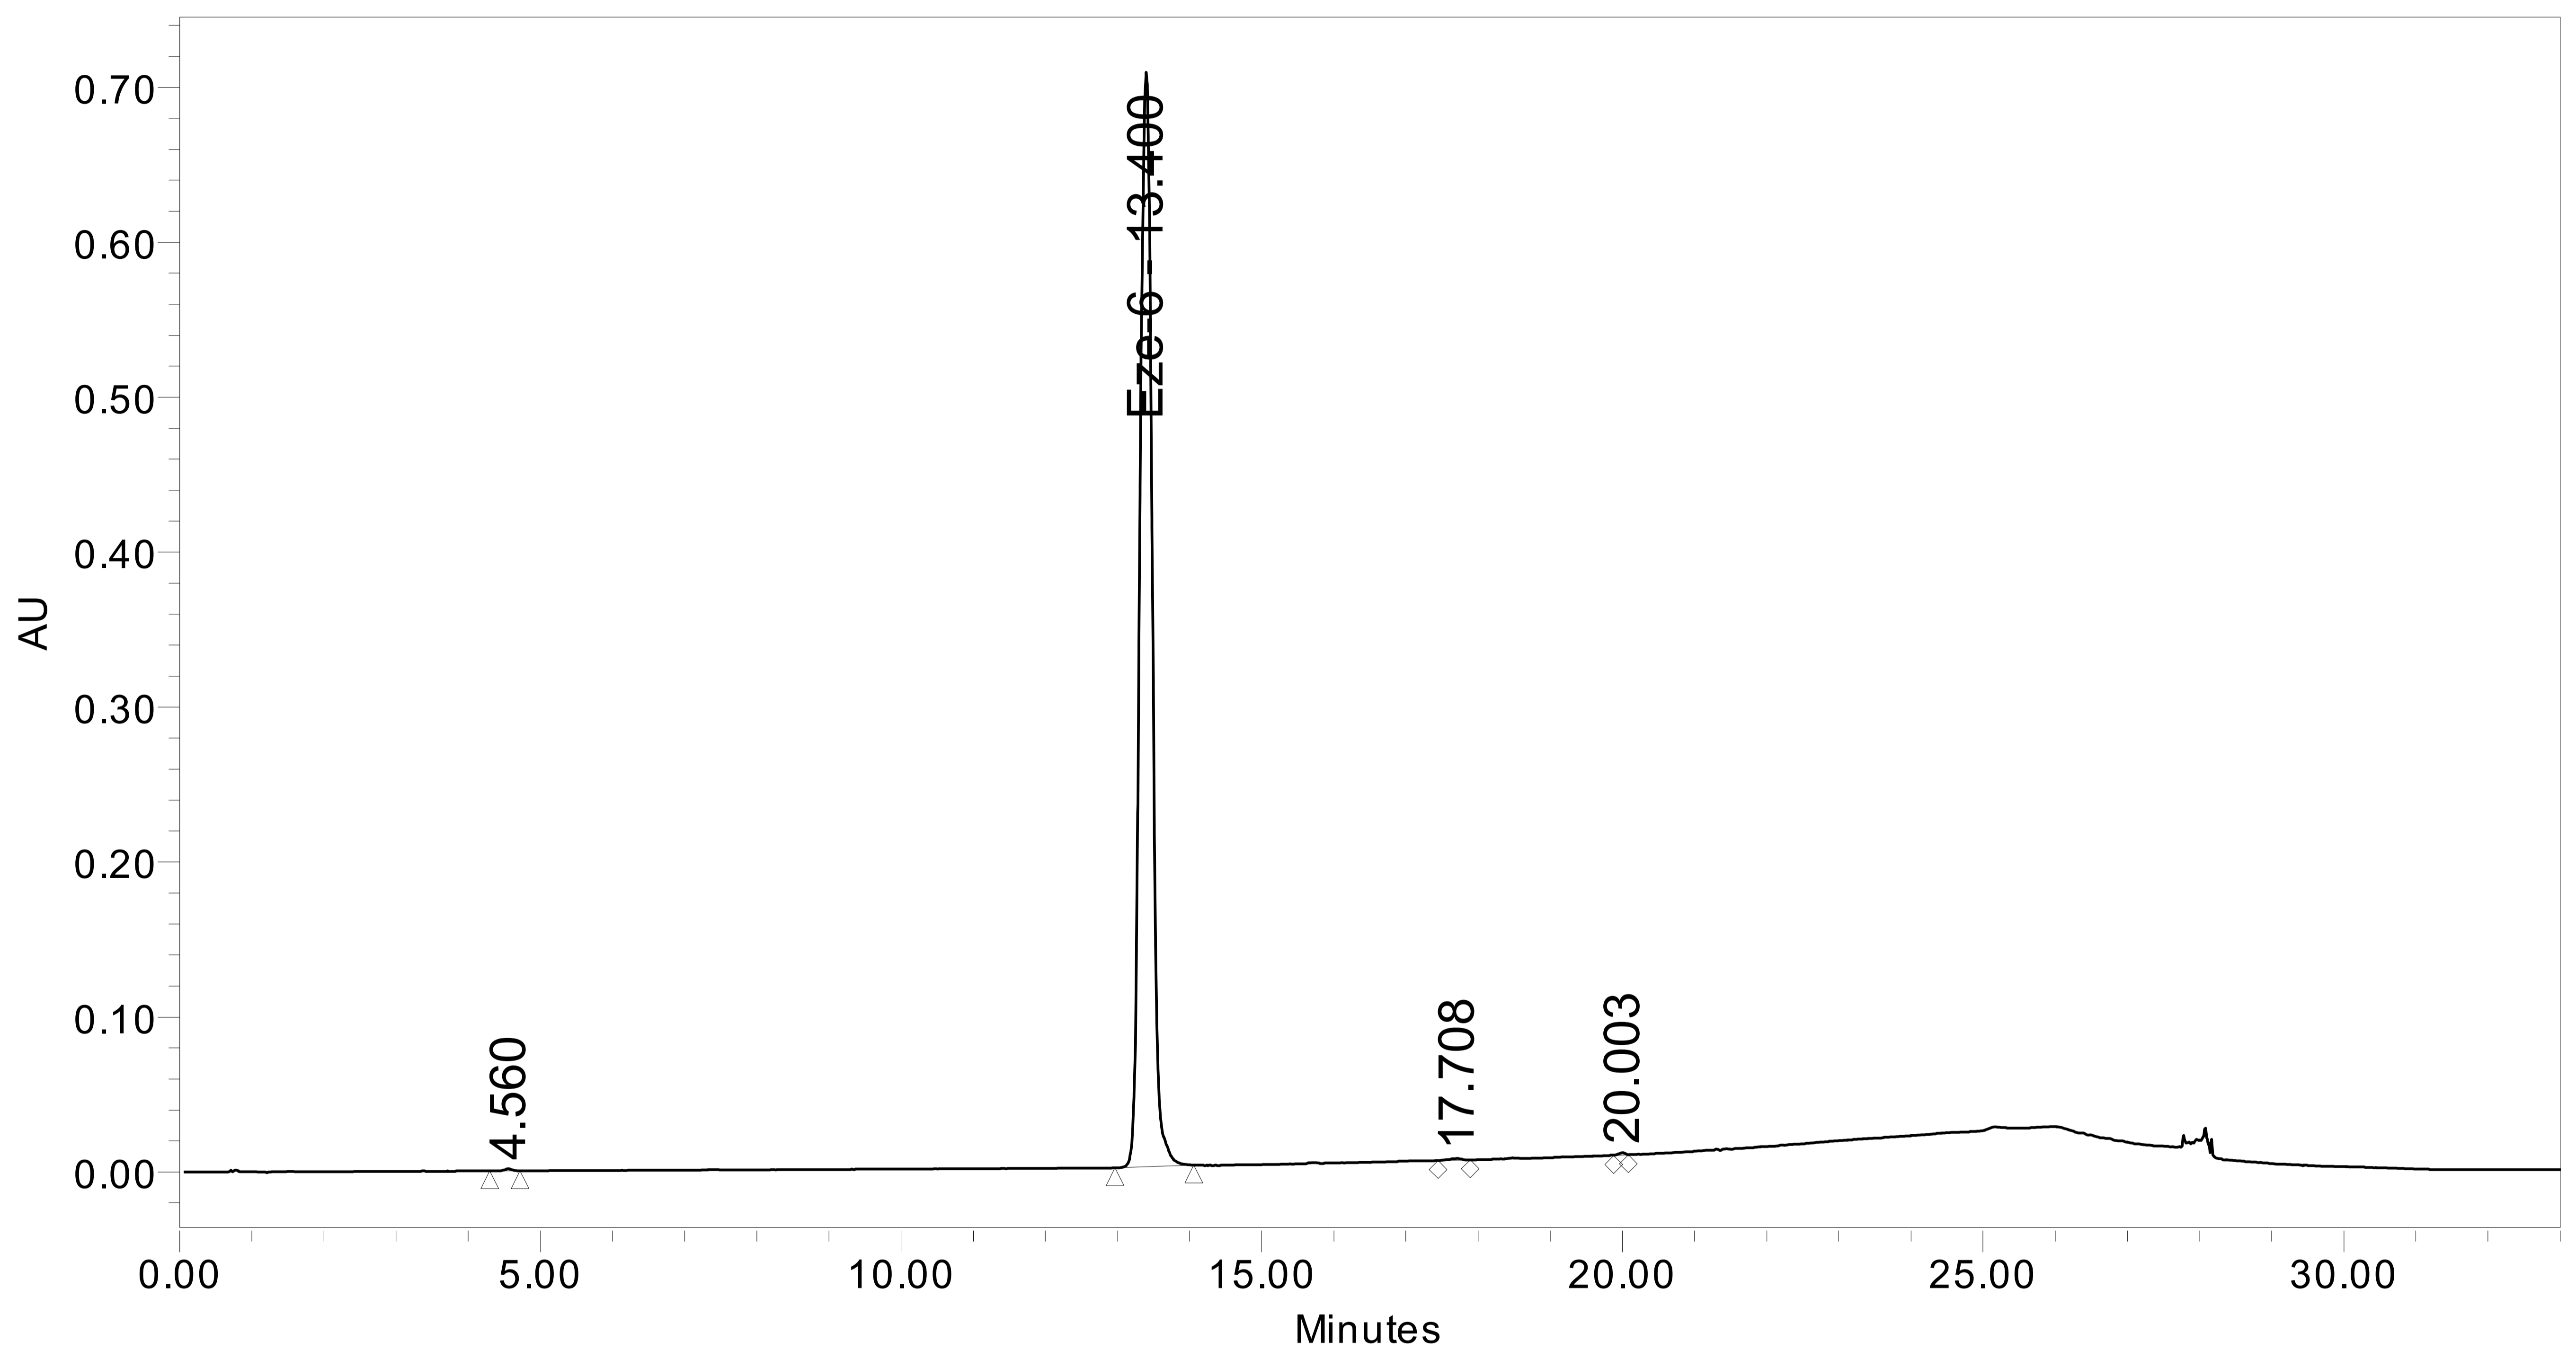

|   | Peak Name  | RT     | Area    | % Area | Height |
|---|------------|--------|---------|--------|--------|
| 1 |            | 4.560  | 9372    | 0.11   | 1297   |
| 2 | Eze-6      | 13.400 | 8373997 | 99.61  | 706384 |
| 3 | desF Eze-6 | 13.800 |         |        |        |
| 4 |            | 17.708 | 14197   | 0.17   | 1075   |
| 5 |            | 20.003 | 9587    | 0.11   | 1463   |

SAMPLE INFORMATION

|                                           |              |                     |                        |
|-------------------------------------------|--------------|---------------------|------------------------|
| Sample Name:                              | desF Eze-6   | Acquired By:        | System                 |
| Sample Type:                              | Unknown      | Sample Set Name:    | EZE 22 23 24 DESFLORO  |
| Vial:                                     | 1:A,6        | Acq. Method Set:    | EZETIMIBE EZE_22       |
| Injection #:                              | 1            | Processing Method:  | desF Eze intermediates |
| Injection Volume:                         | 2.00 ul      | Channel Name:       | ACQUITY TUV ChA        |
| Run Time:                                 | 33.0 Minutes | Proc. Chnl. Descr.: | ACQUITY TUV ChA 220nm  |
| Date Acquired: 8/14/2014 7:43:40 PM EEST  |              |                     |                        |
| Date Processed: 8/15/2014 8:40:56 AM EEST |              |                     |                        |

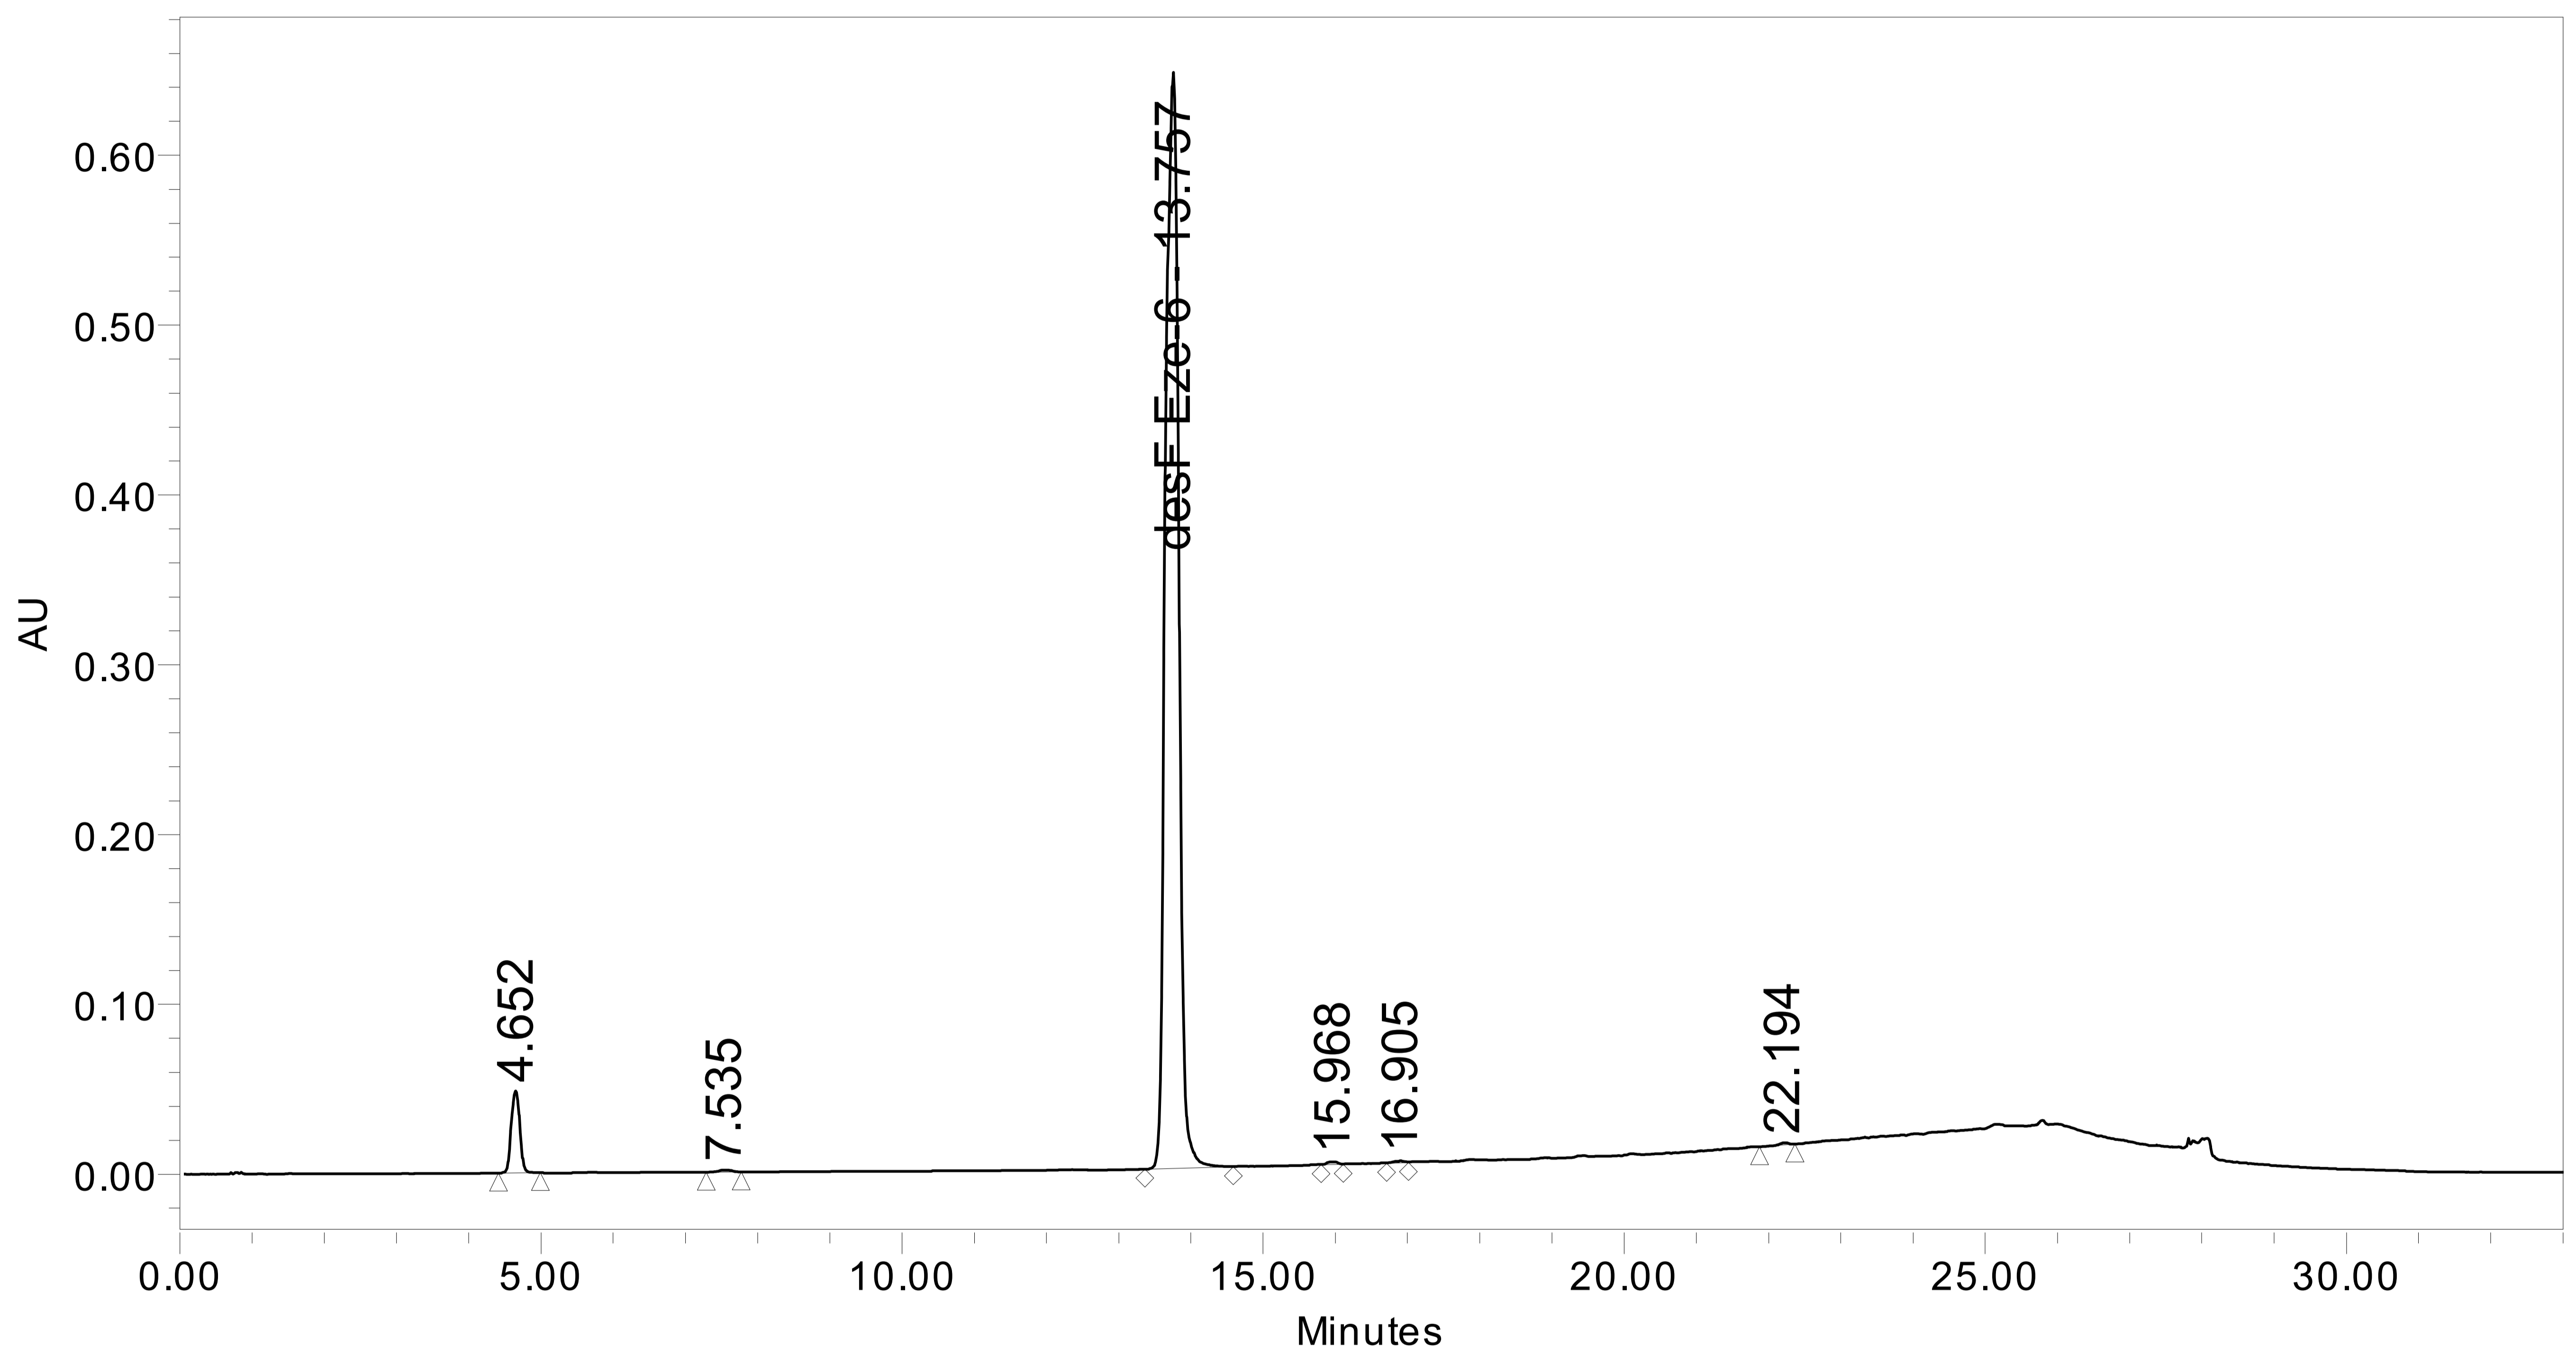

|   | Peak Name  | RT     | Area    | % Area | Height |
|---|------------|--------|---------|--------|--------|
| 1 |            | 4.652  | 400104  | 4.57   | 48282  |
| 2 |            | 7.535  | 14664   | 0.17   | 1168   |
| 3 | Eze-6      | 13.400 |         |        |        |
| 4 | desF Eze-6 | 13.757 | 8304438 | 94.81  | 645441 |
| 5 |            | 15.968 | 17220   | 0.20   | 1661   |
| 6 |            | 16.905 | 12484   | 0.14   | 1110   |
| 7 |            | 22.194 | 10351   | 0.12   | 1169   |



SAMPLE INFORMATION

|                                           |                  |                     |                        |
|-------------------------------------------|------------------|---------------------|------------------------|
| Sample Name:                              | Eze-6+desF Eze-6 | Acquired By:        | System                 |
| Sample Type:                              | Unknown          | Sample Set Name:    | EZE 22 23 24 DESFLORO  |
| Vial:                                     | 1:A,7            | Acq. Method Set:    | EZETIMIBE EZE_22       |
| Injection #:                              | 1                | Processing Method:  | desF Eze intermediates |
| Injection Volume:                         | 2.00 ul          | Channel Name:       | ACQUITY TUV ChA        |
| Run Time:                                 | 33.0 Minutes     | Proc. Chnl. Descr.: | ACQUITY TUV ChA 220nm  |
| Date Acquired: 8/14/2014 8:17:52 PM EEST  |                  |                     |                        |
| Date Processed: 8/15/2014 8:41:33 AM EEST |                  |                     |                        |

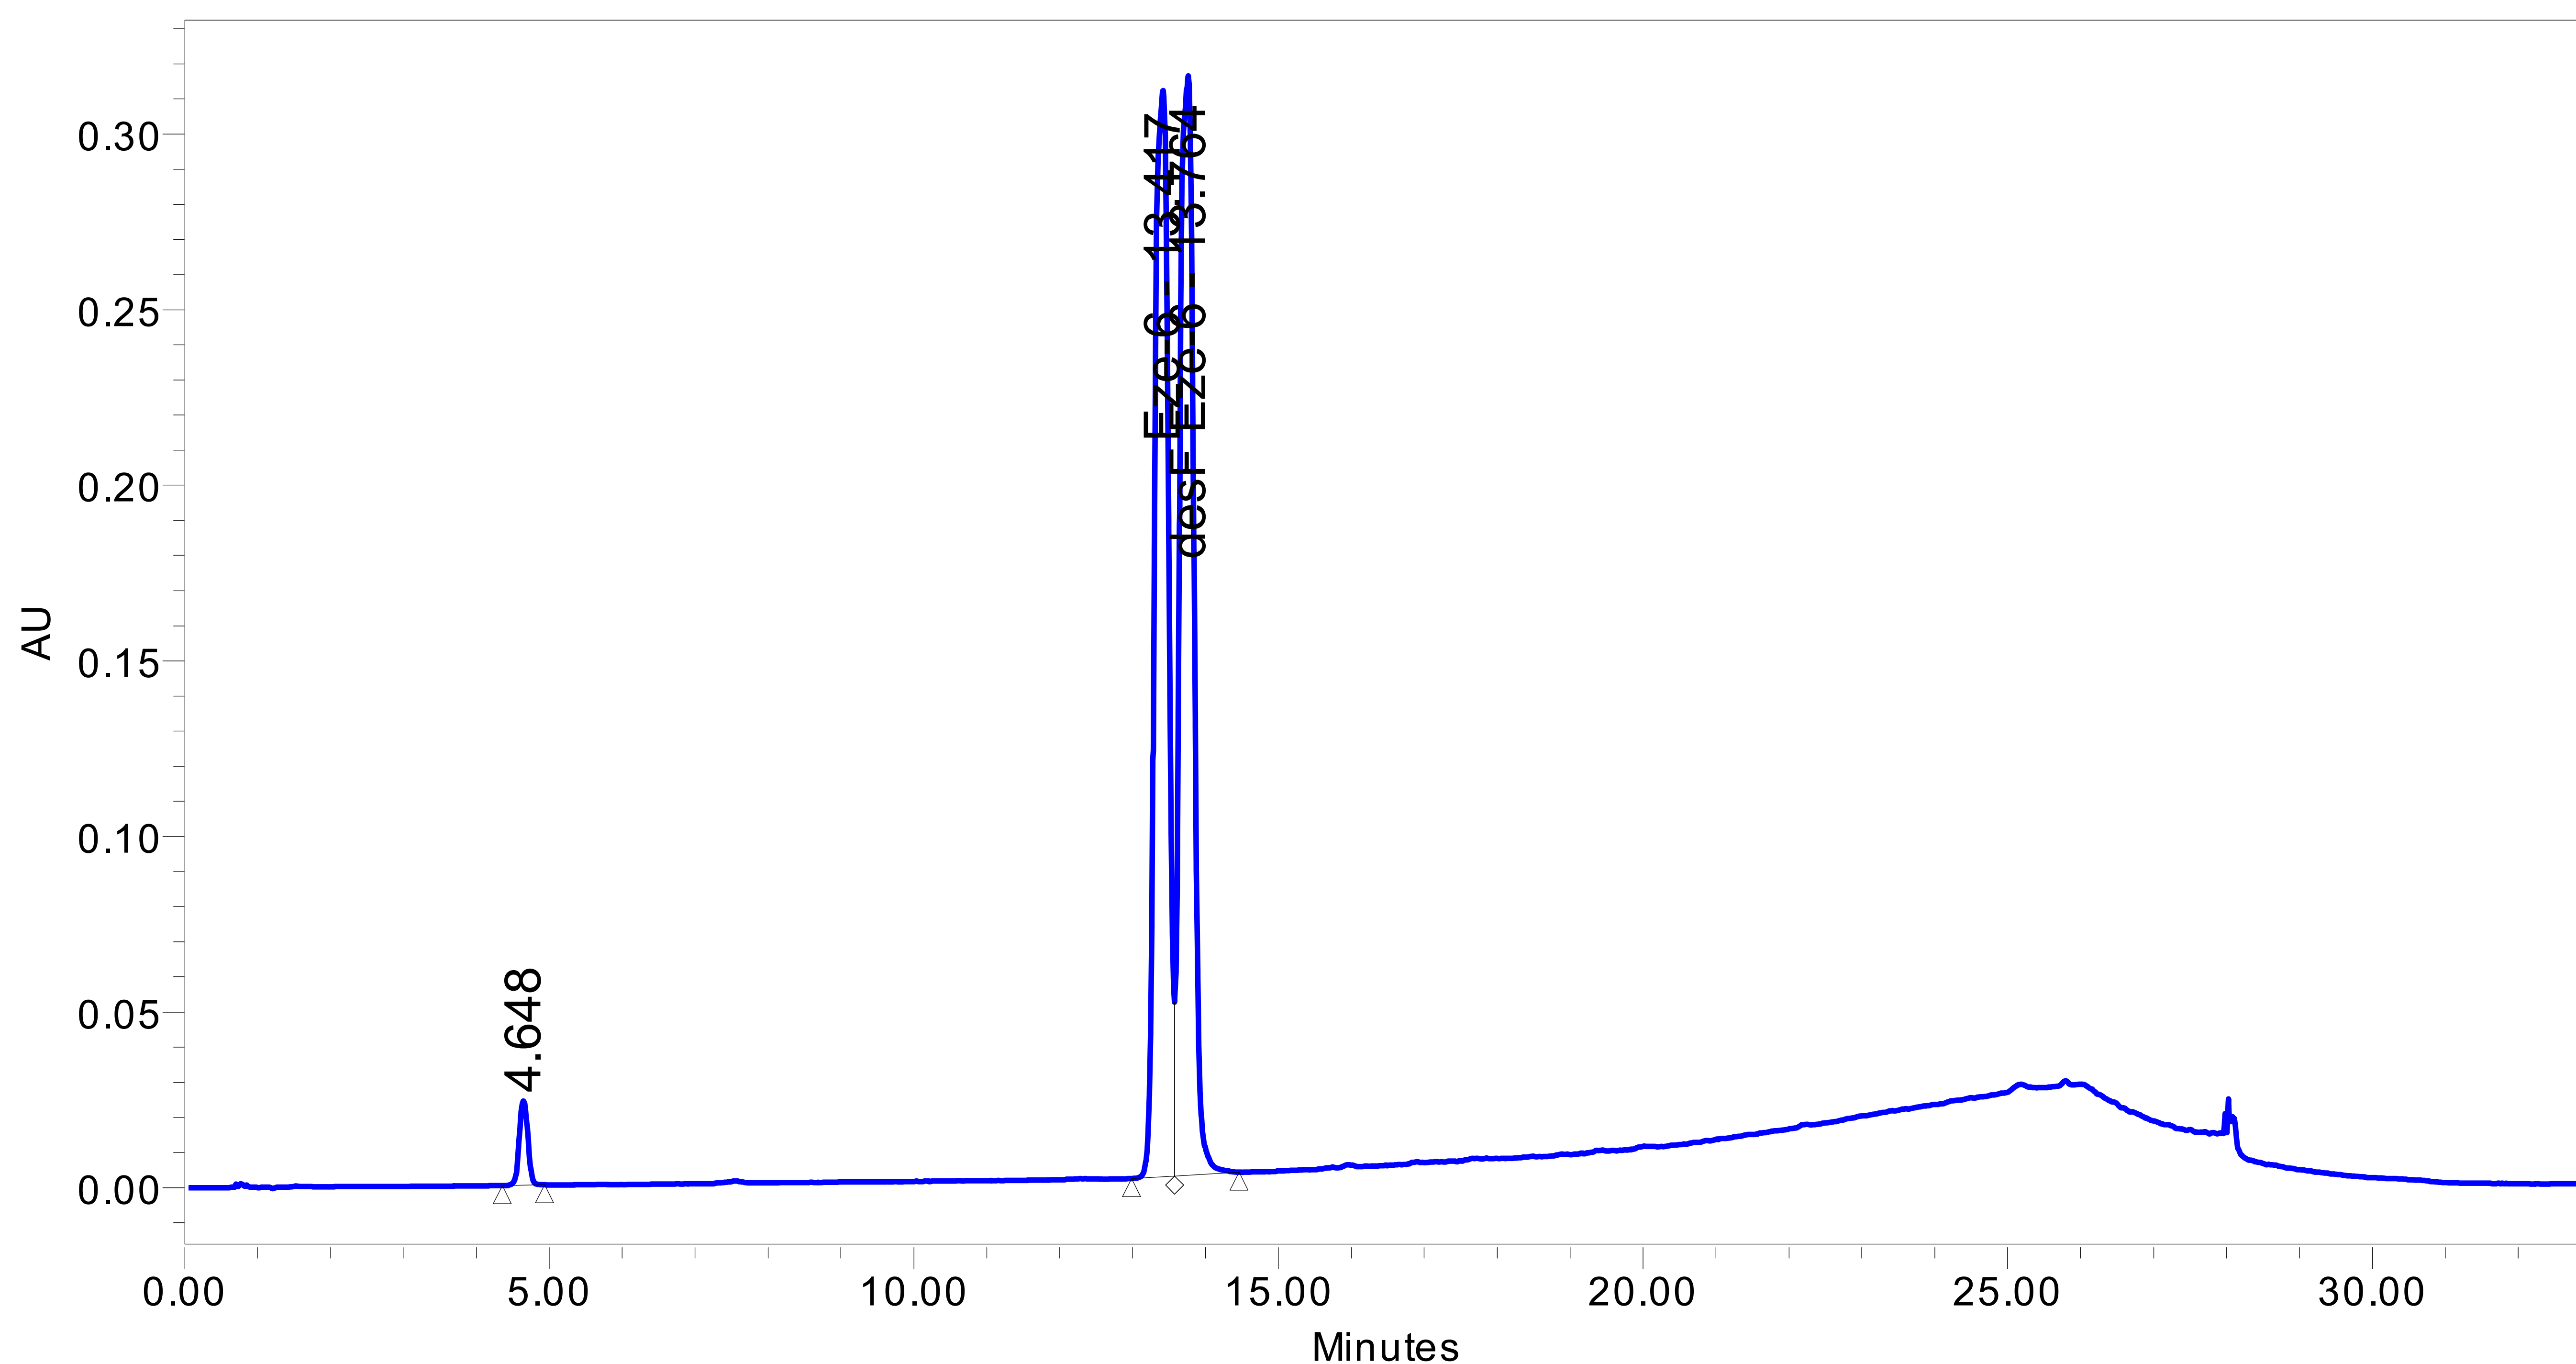

|   | Peak Name  | RT     | Area    | % Area | Height |
|---|------------|--------|---------|--------|--------|
| 1 |            | 4.648  | 200525  | 2.36   | 23982  |
| 2 | Eze-6      | 13.417 | 4102778 | 48.26  | 309299 |
| 3 | desF Eze-6 | 13.764 | 4198150 | 49.38  | 313047 |

SAMPLE INFORMATION

|                                           |              |                     |                        |
|-------------------------------------------|--------------|---------------------|------------------------|
| Sample Name:                              | Eze-7        | Acquired By:        | System                 |
| Sample Type:                              | Unknown      | Sample Set Name:    | EZE 22 23 24 DESFLORO  |
| Vial:                                     | 1:A,8        | Acq. Method Set:    | EZETIMIBE EZE_22       |
| Injection #:                              | 1            | Processing Method:  | desF Eze intermediates |
| Injection Volume:                         | 2.00 ul      | Channel Name:       | ACQUITY TUV ChA        |
| Run Time:                                 | 33.0 Minutes | Proc. Chnl. Descr.: | ACQUITY TUV ChA 220nm  |
| Date Acquired: 8/14/2014 9:26:19 PM EEST  |              |                     |                        |
| Date Processed: 8/15/2014 8:45:23 AM EEST |              |                     |                        |

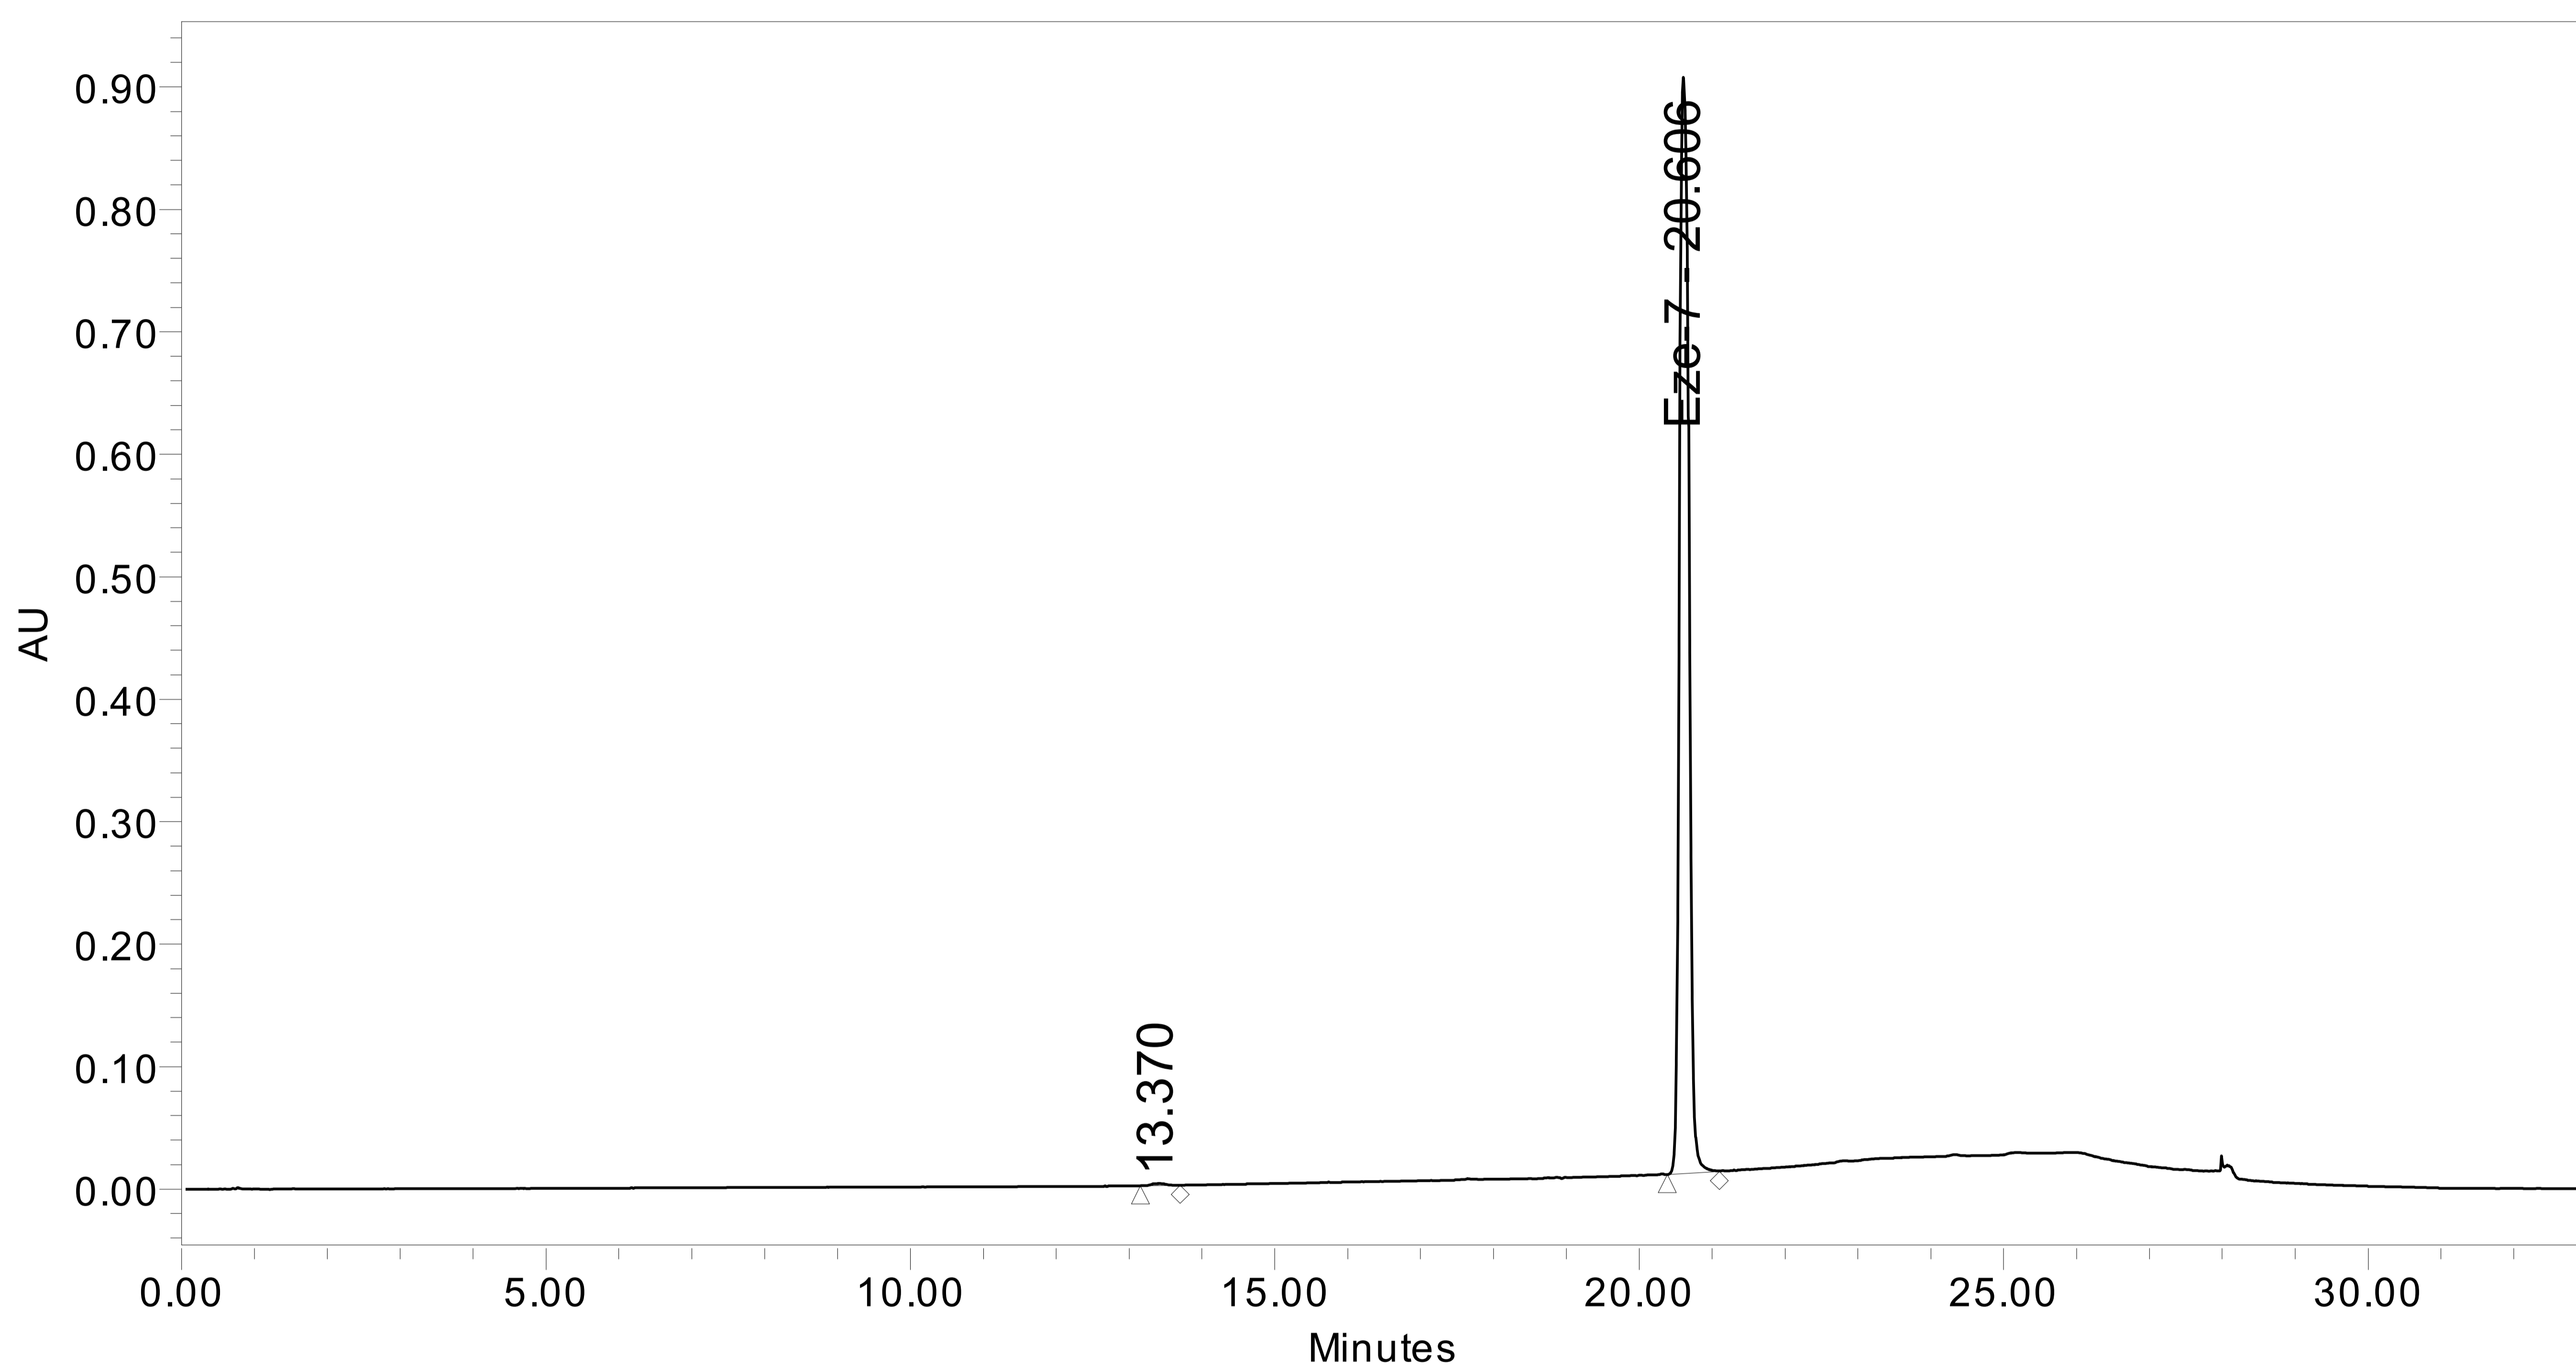

|   | Peak Name  | RT     | Area    | % Area | Height |
|---|------------|--------|---------|--------|--------|
| 1 |            | 13.370 | 21890   | 0.27   | 1563   |
| 2 | Eze-7      | 20.606 | 8122363 | 99.73  | 895164 |
| 3 | desF Eze-7 | 20.900 |         |        |        |

SAMPLE INFORMATION

|                                           |              |                     |                        |
|-------------------------------------------|--------------|---------------------|------------------------|
| Sample Name:                              | desF Eze-7   | Acquired By:        | System                 |
| Sample Type:                              | Unknown      | Sample Set Name:    | EZE 22 23 24 DESFLORO  |
| Vial:                                     | 1:B,1        | Acq. Method Set:    | EZETIMIBE EZE_22       |
| Injection #:                              | 1            | Processing Method:  | desF Eze intermediates |
| Injection Volume:                         | 2.00 ul      | Channel Name:       | ACQUITY TUV ChA        |
| Run Time:                                 | 33.0 Minutes | Proc. Chnl. Descr.: | ACQUITY TUV ChA 220nm  |
| Date Acquired: 8/14/2014 10:00:31 PM EEST |              |                     |                        |
| Date Processed: 8/15/2014 8:45:54 AM EEST |              |                     |                        |

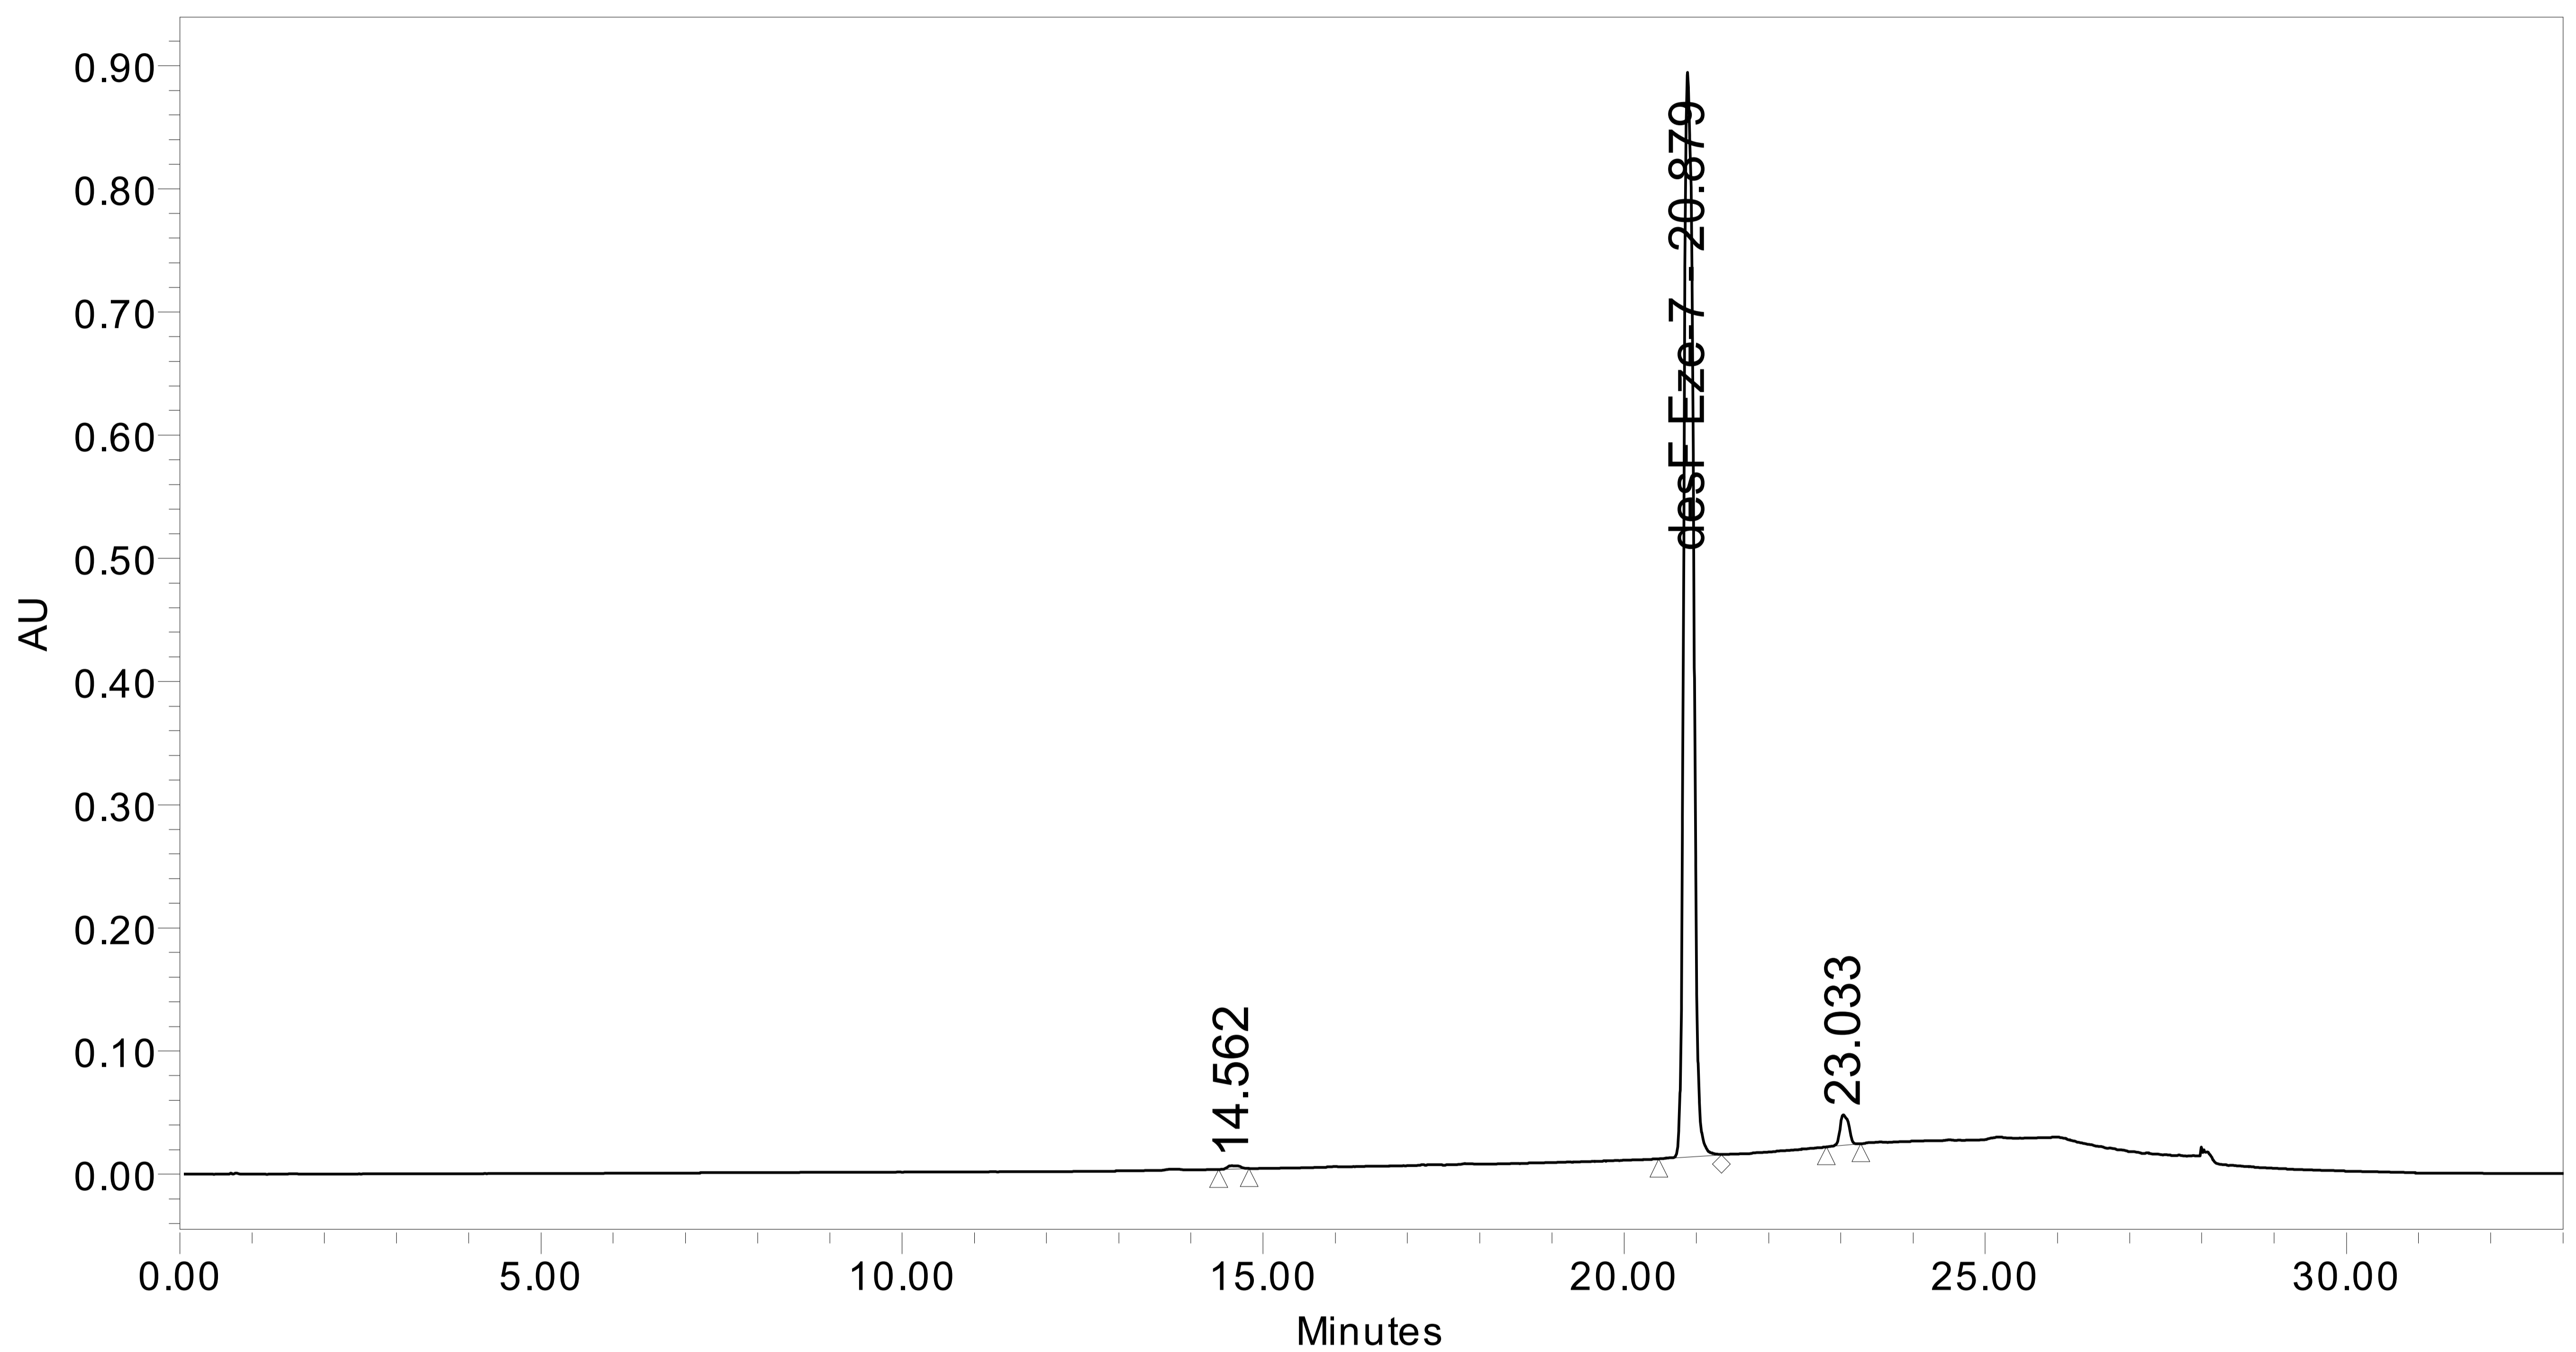

|   | Peak Name  | RT     | Area    | % Area | Height |
|---|------------|--------|---------|--------|--------|
| 1 |            | 14.562 | 32275   | 0.39   | 2731   |
| 2 | Eze-7      | 20.600 |         |        |        |
| 3 | desF Eze-7 | 20.879 | 8099125 | 97.10  | 880831 |
| 4 |            | 23.033 | 209447  | 2.51   | 24775  |



SAMPLE INFORMATION

|                                           |                  |                     |                        |
|-------------------------------------------|------------------|---------------------|------------------------|
| Sample Name:                              | Eze-7+desF Eze-7 | Acquired By:        | System                 |
| Sample Type:                              | Unknown          | Sample Set Name:    | EZE 22 23 24 DESFLORO  |
| Vial:                                     | 1:B,2            | Acq. Method Set:    | EZETIMIBE EZE_22       |
| Injection #:                              | 1                | Processing Method:  | desF Eze intermediates |
| Injection Volume:                         | 2.00 ul          | Channel Name:       | ACQUITY TUV ChA        |
| Run Time:                                 | 33.0 Minutes     | Proc. Chnl. Descr.: | ACQUITY TUV ChA 220nm  |
| Date Acquired: 8/14/2014 10:34:44 PM EEST |                  |                     |                        |
| Date Processed: 8/15/2014 8:44:17 AM EEST |                  |                     |                        |

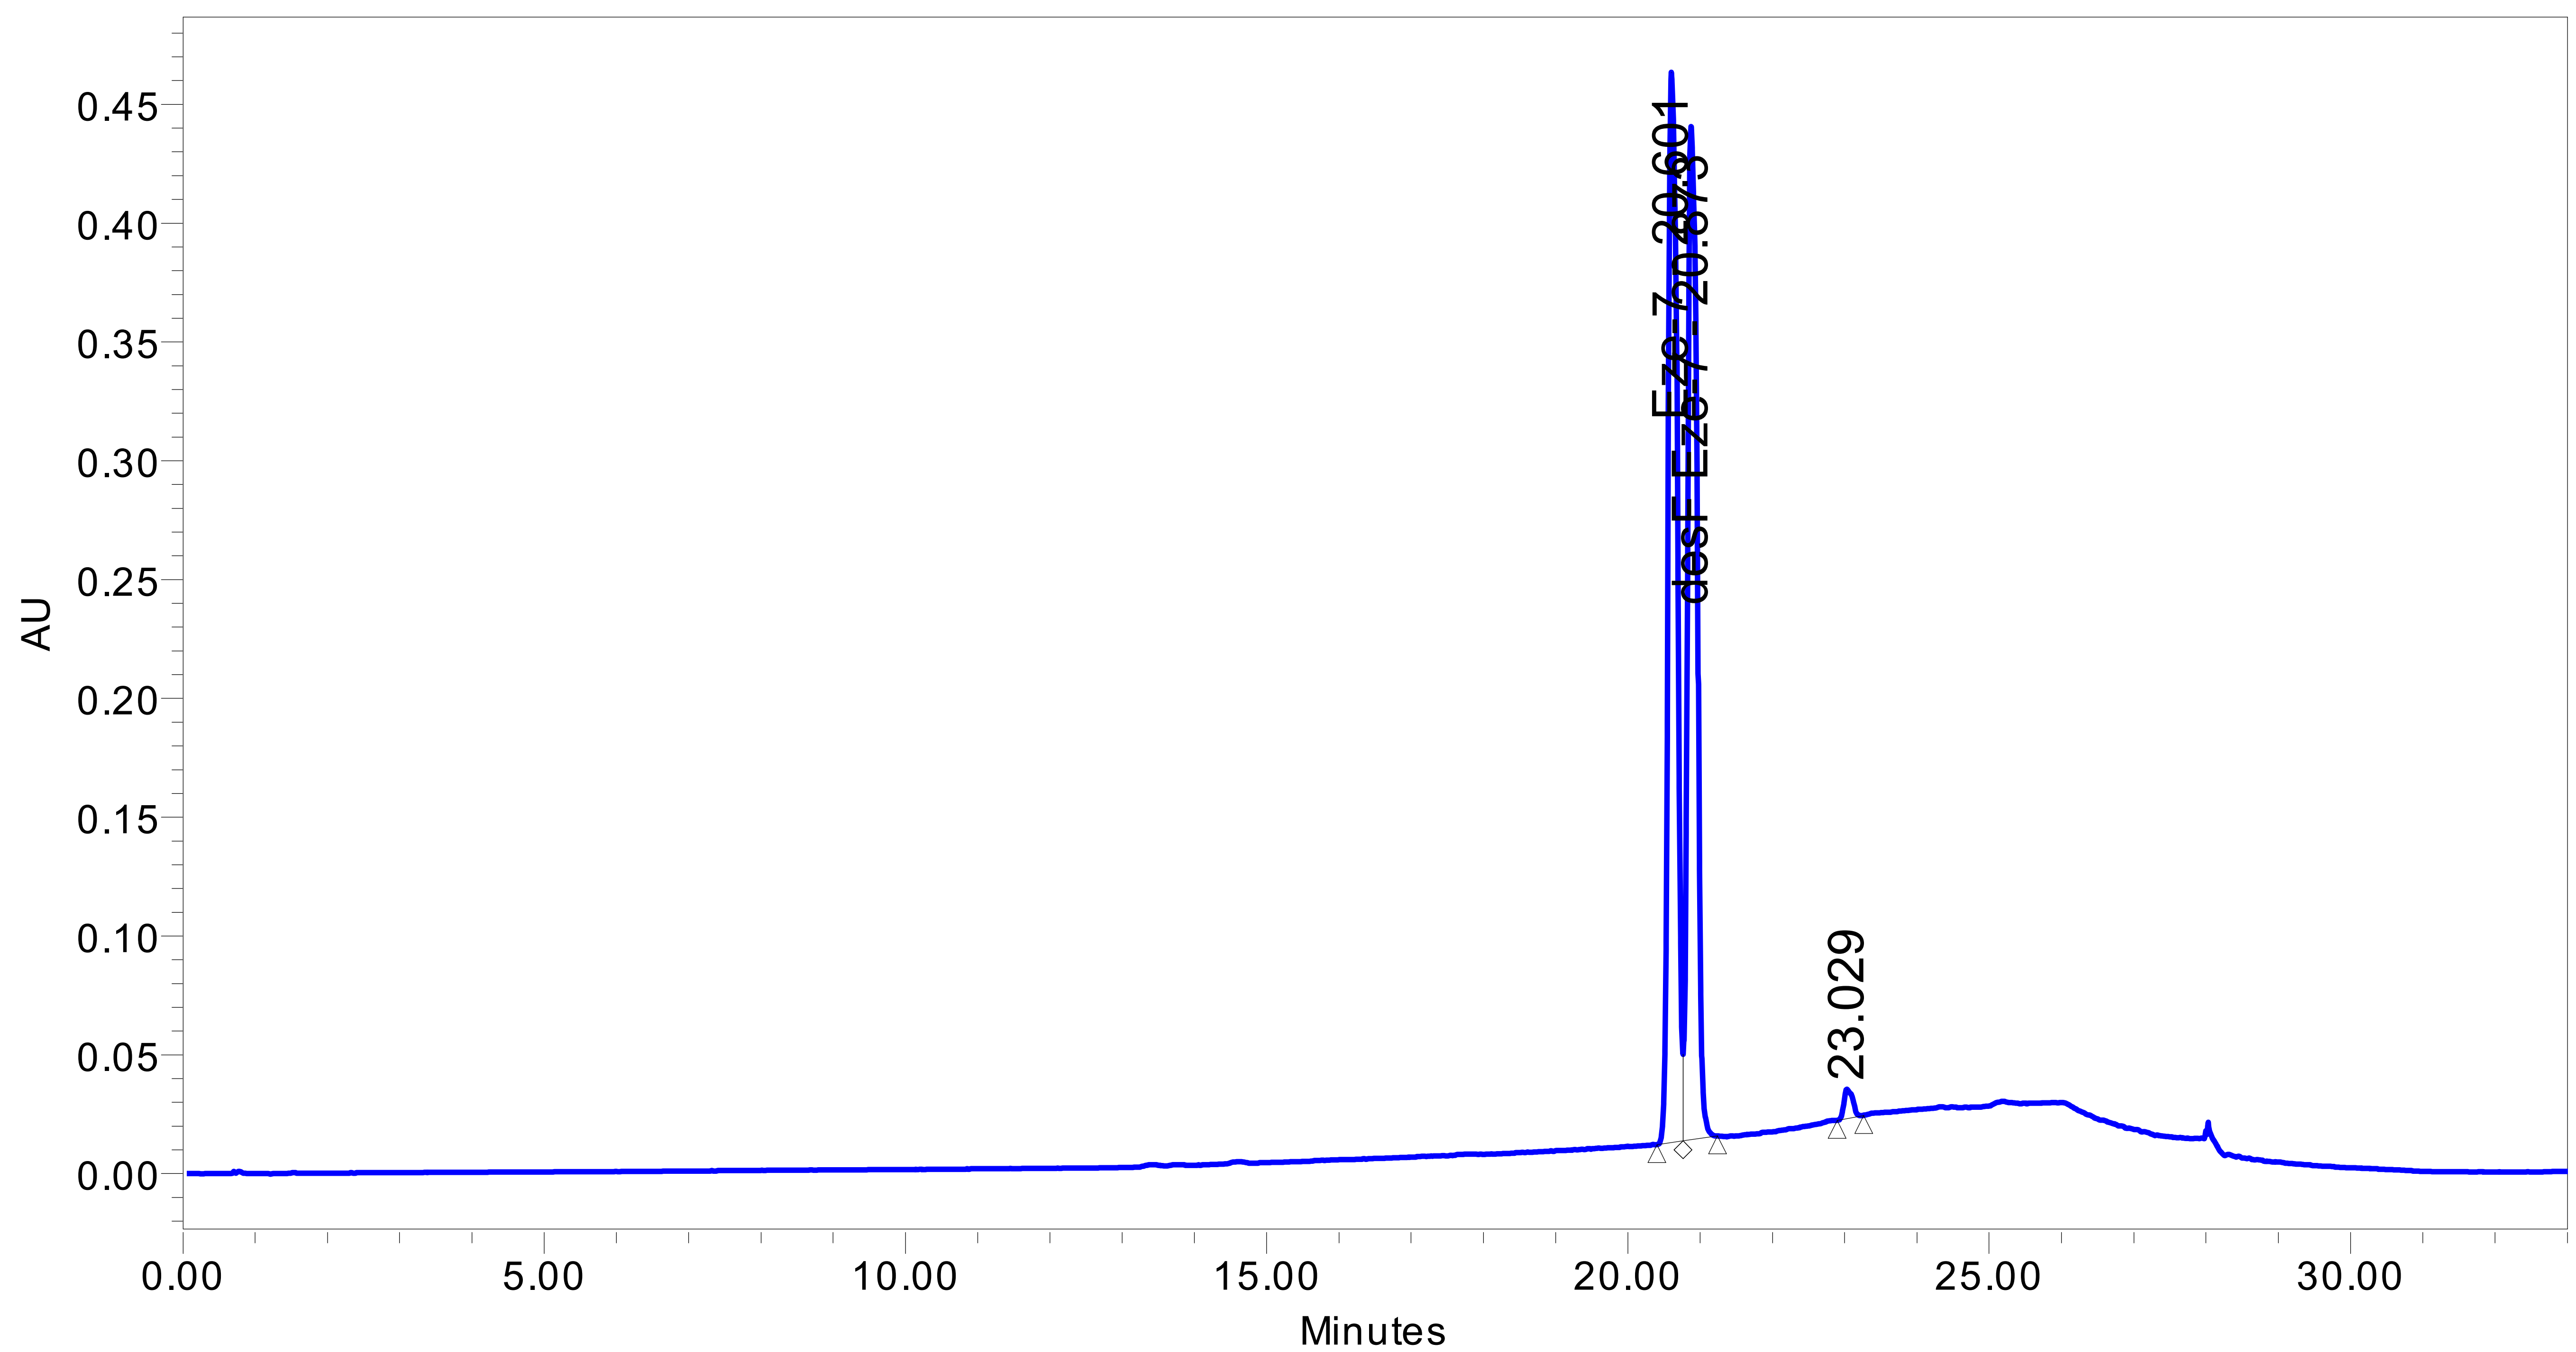

|   | Peak Name  | RT     | Area    | % Area | Height |
|---|------------|--------|---------|--------|--------|
| 1 | Eze-7      | 20.601 | 3992463 | 49.81  | 450456 |
| 2 | desF Eze-7 | 20.873 | 3919906 | 48.91  | 426300 |
| 3 |            | 23.029 | 102276  | 1.28   | 12319  |
